# Supplementary material
Source: PubMed Central journal article supplement (PMC7458070)

# Mass Number: 2

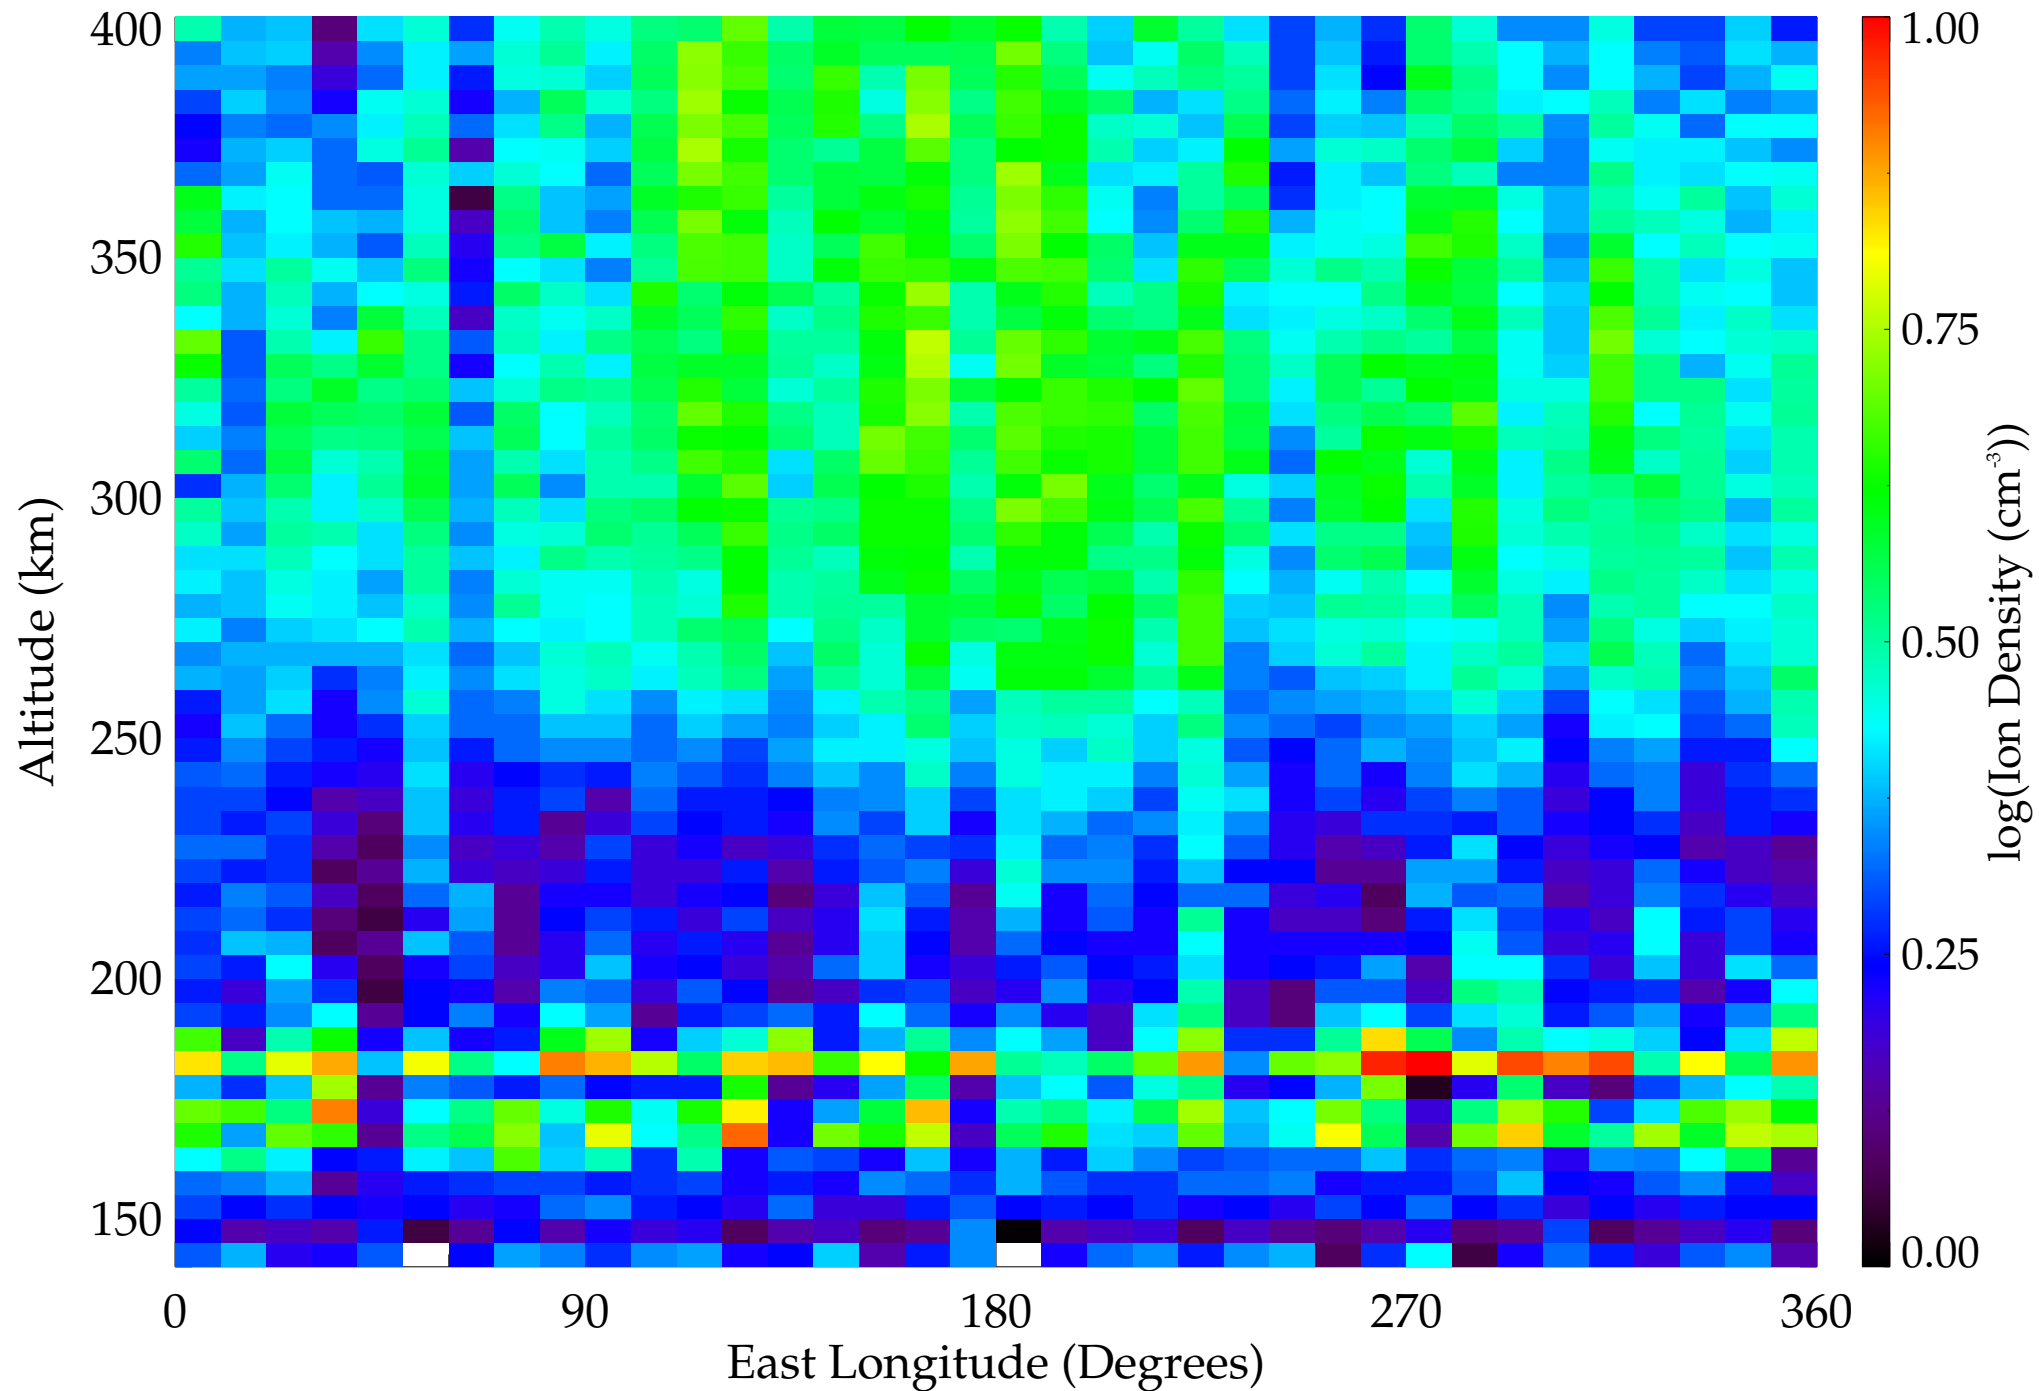

# Mass Number: 3

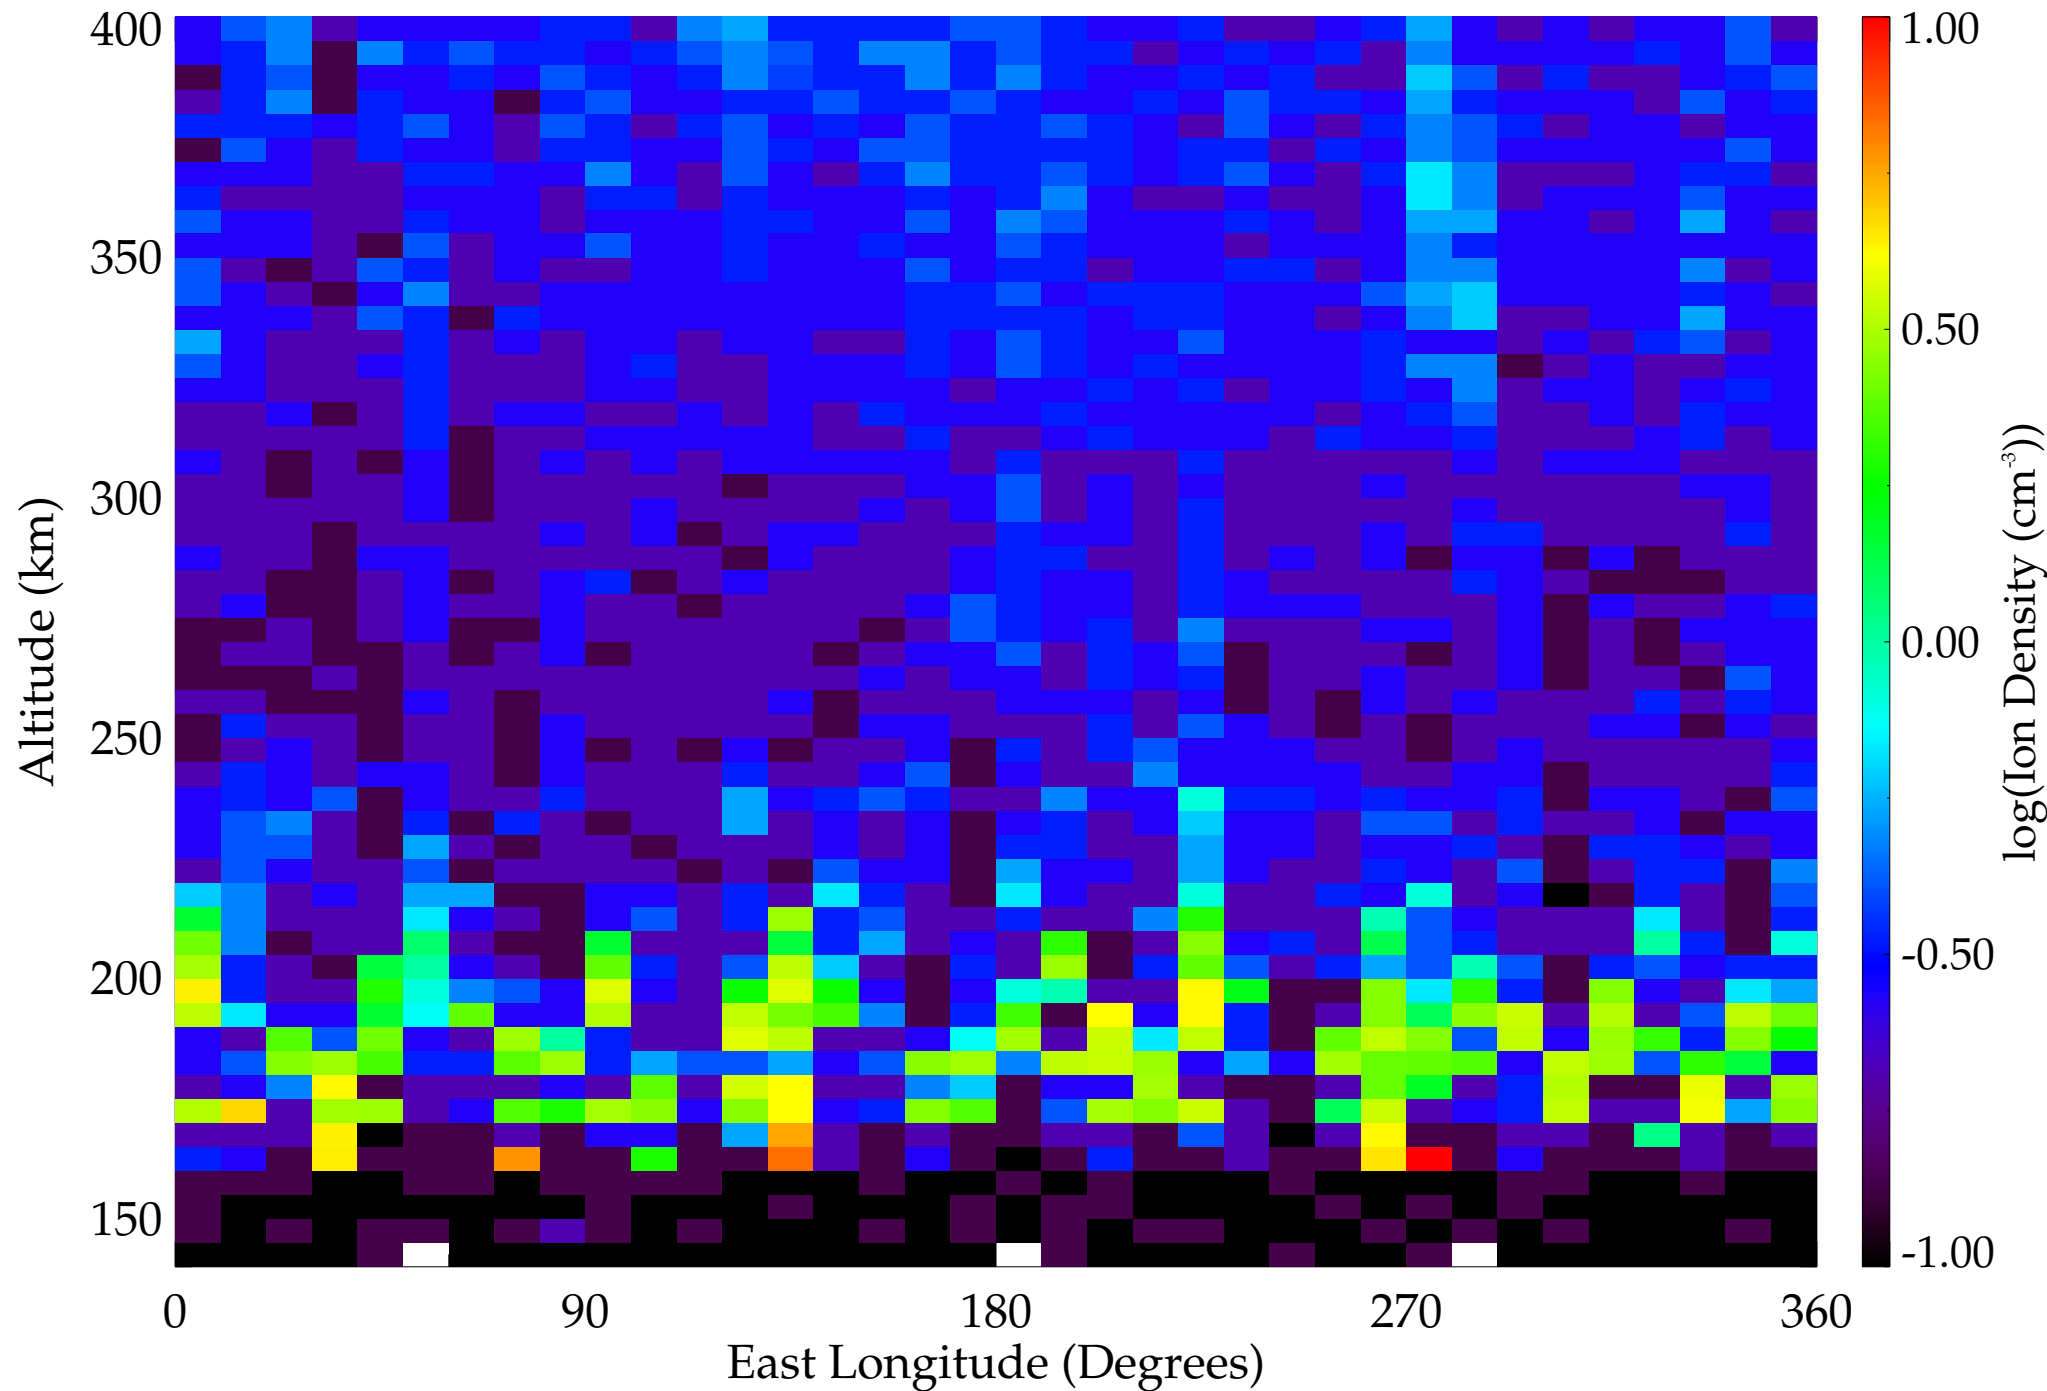

# Mass Number: 4

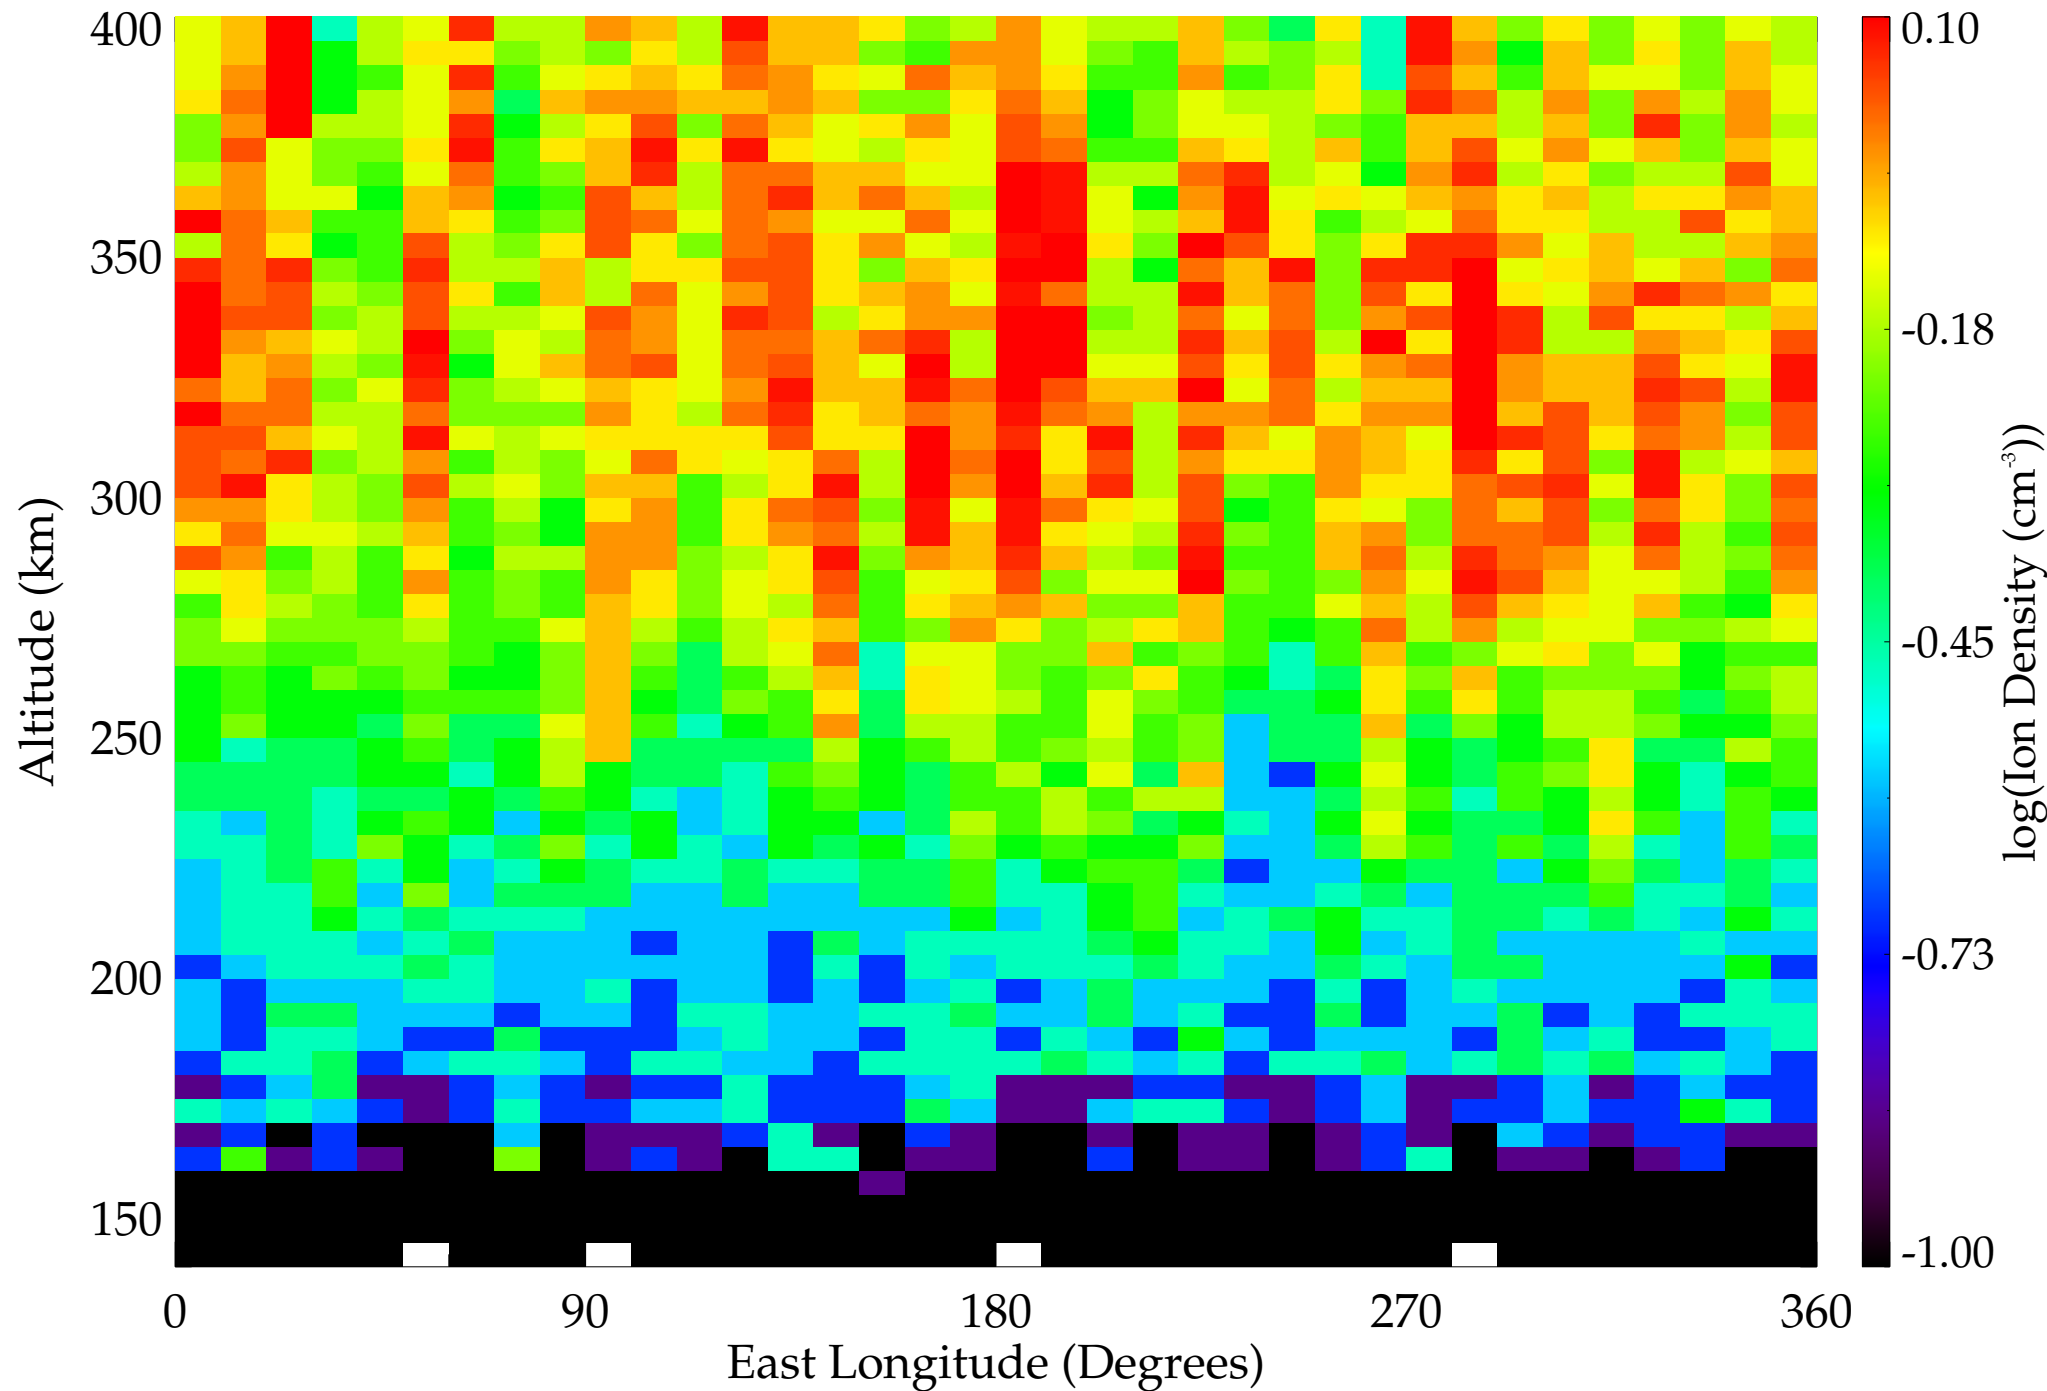

# Mass Number: 6

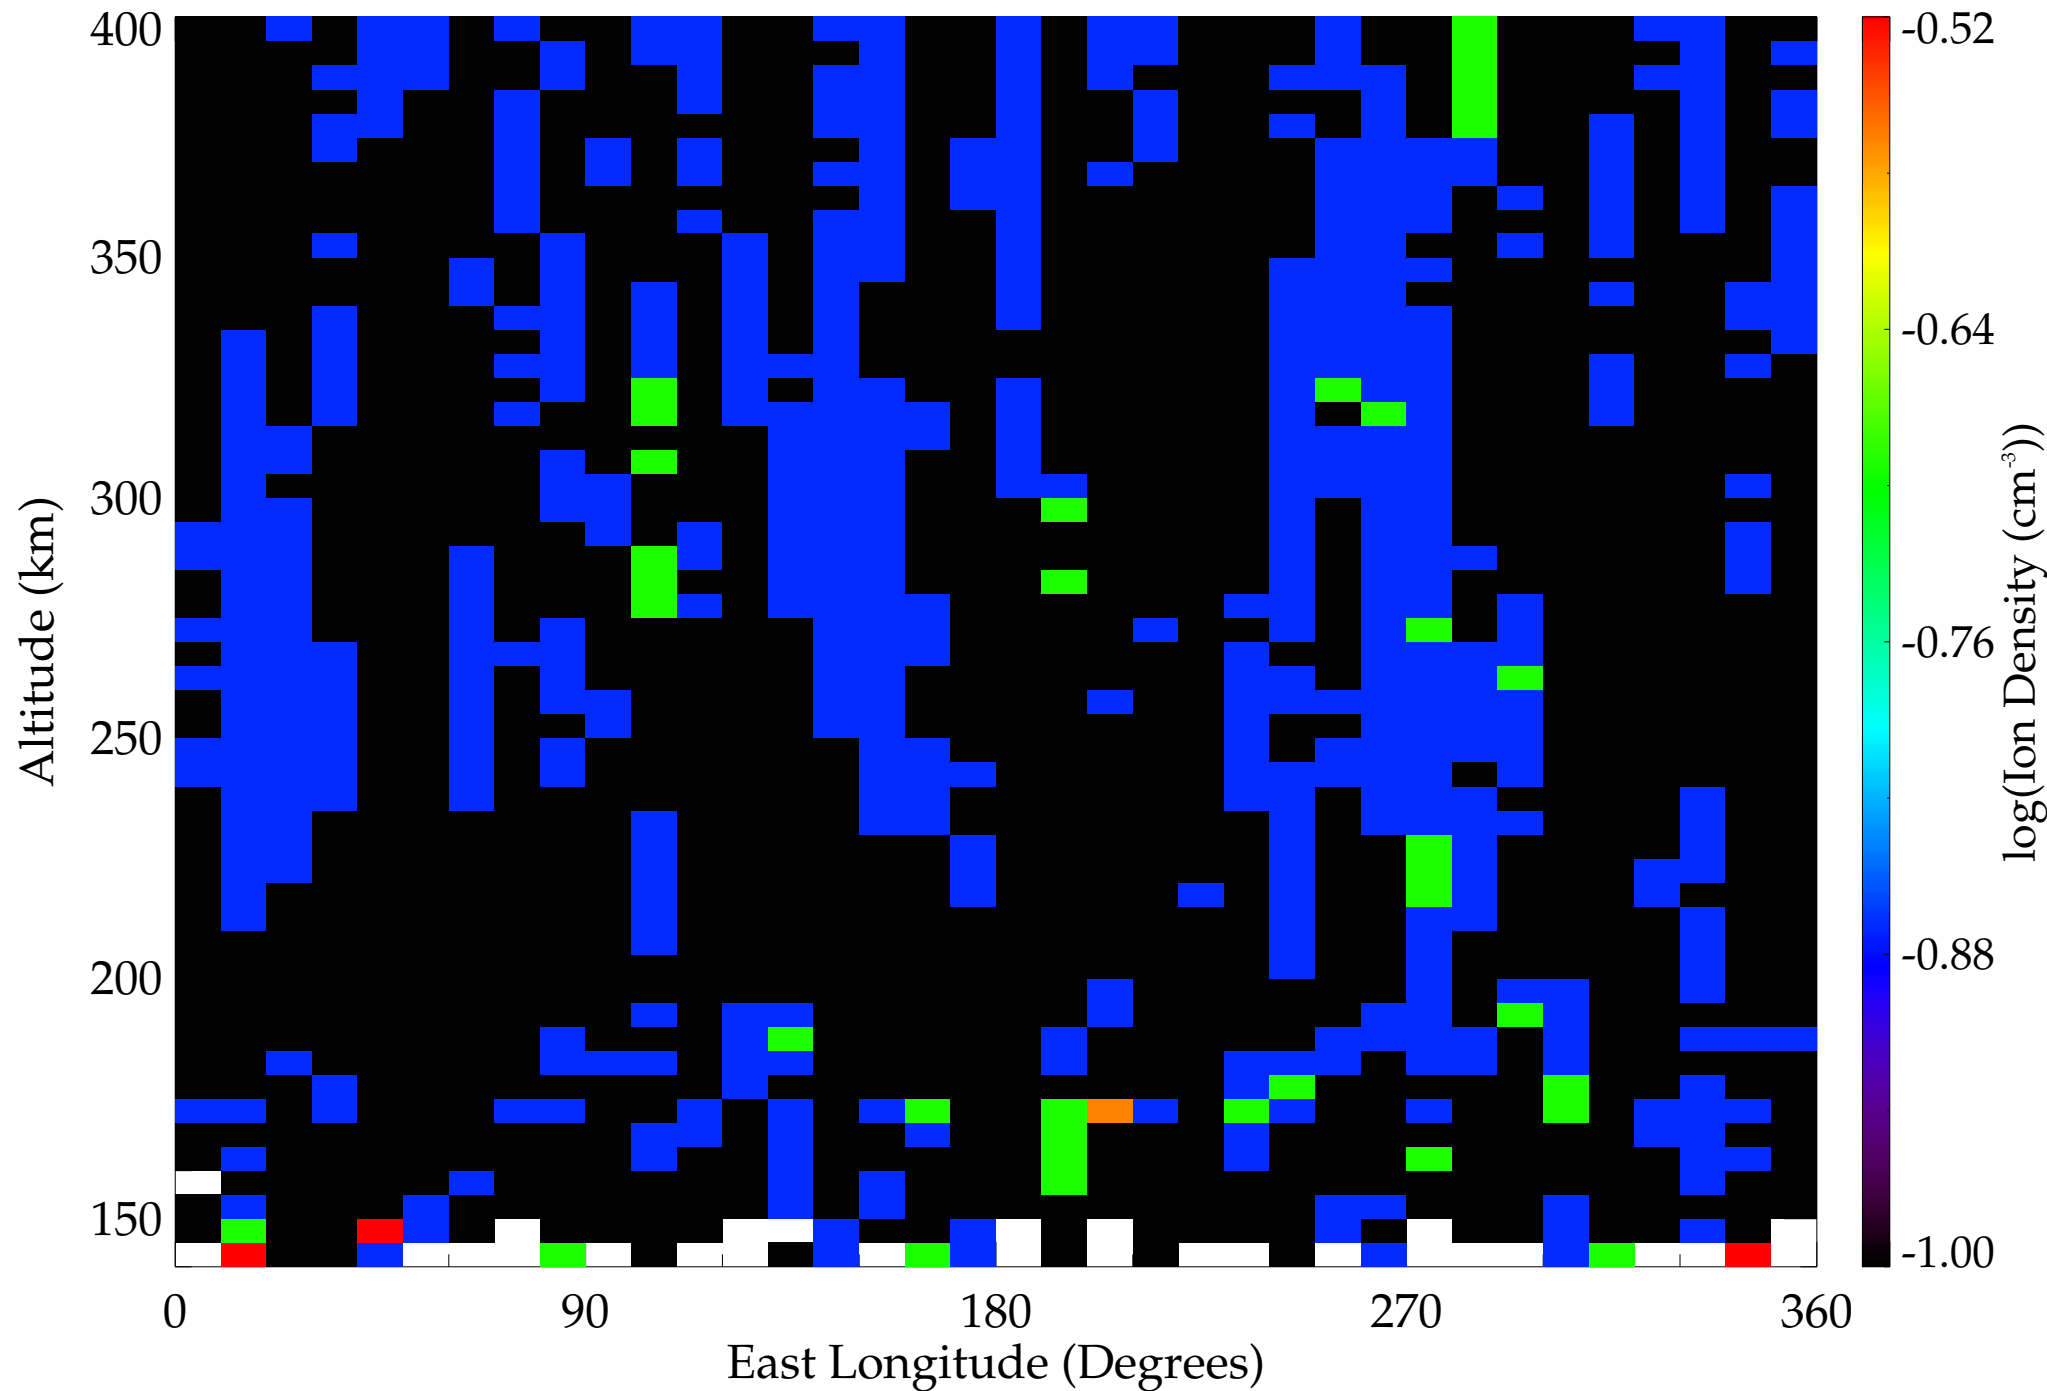

# Mass Number: 8

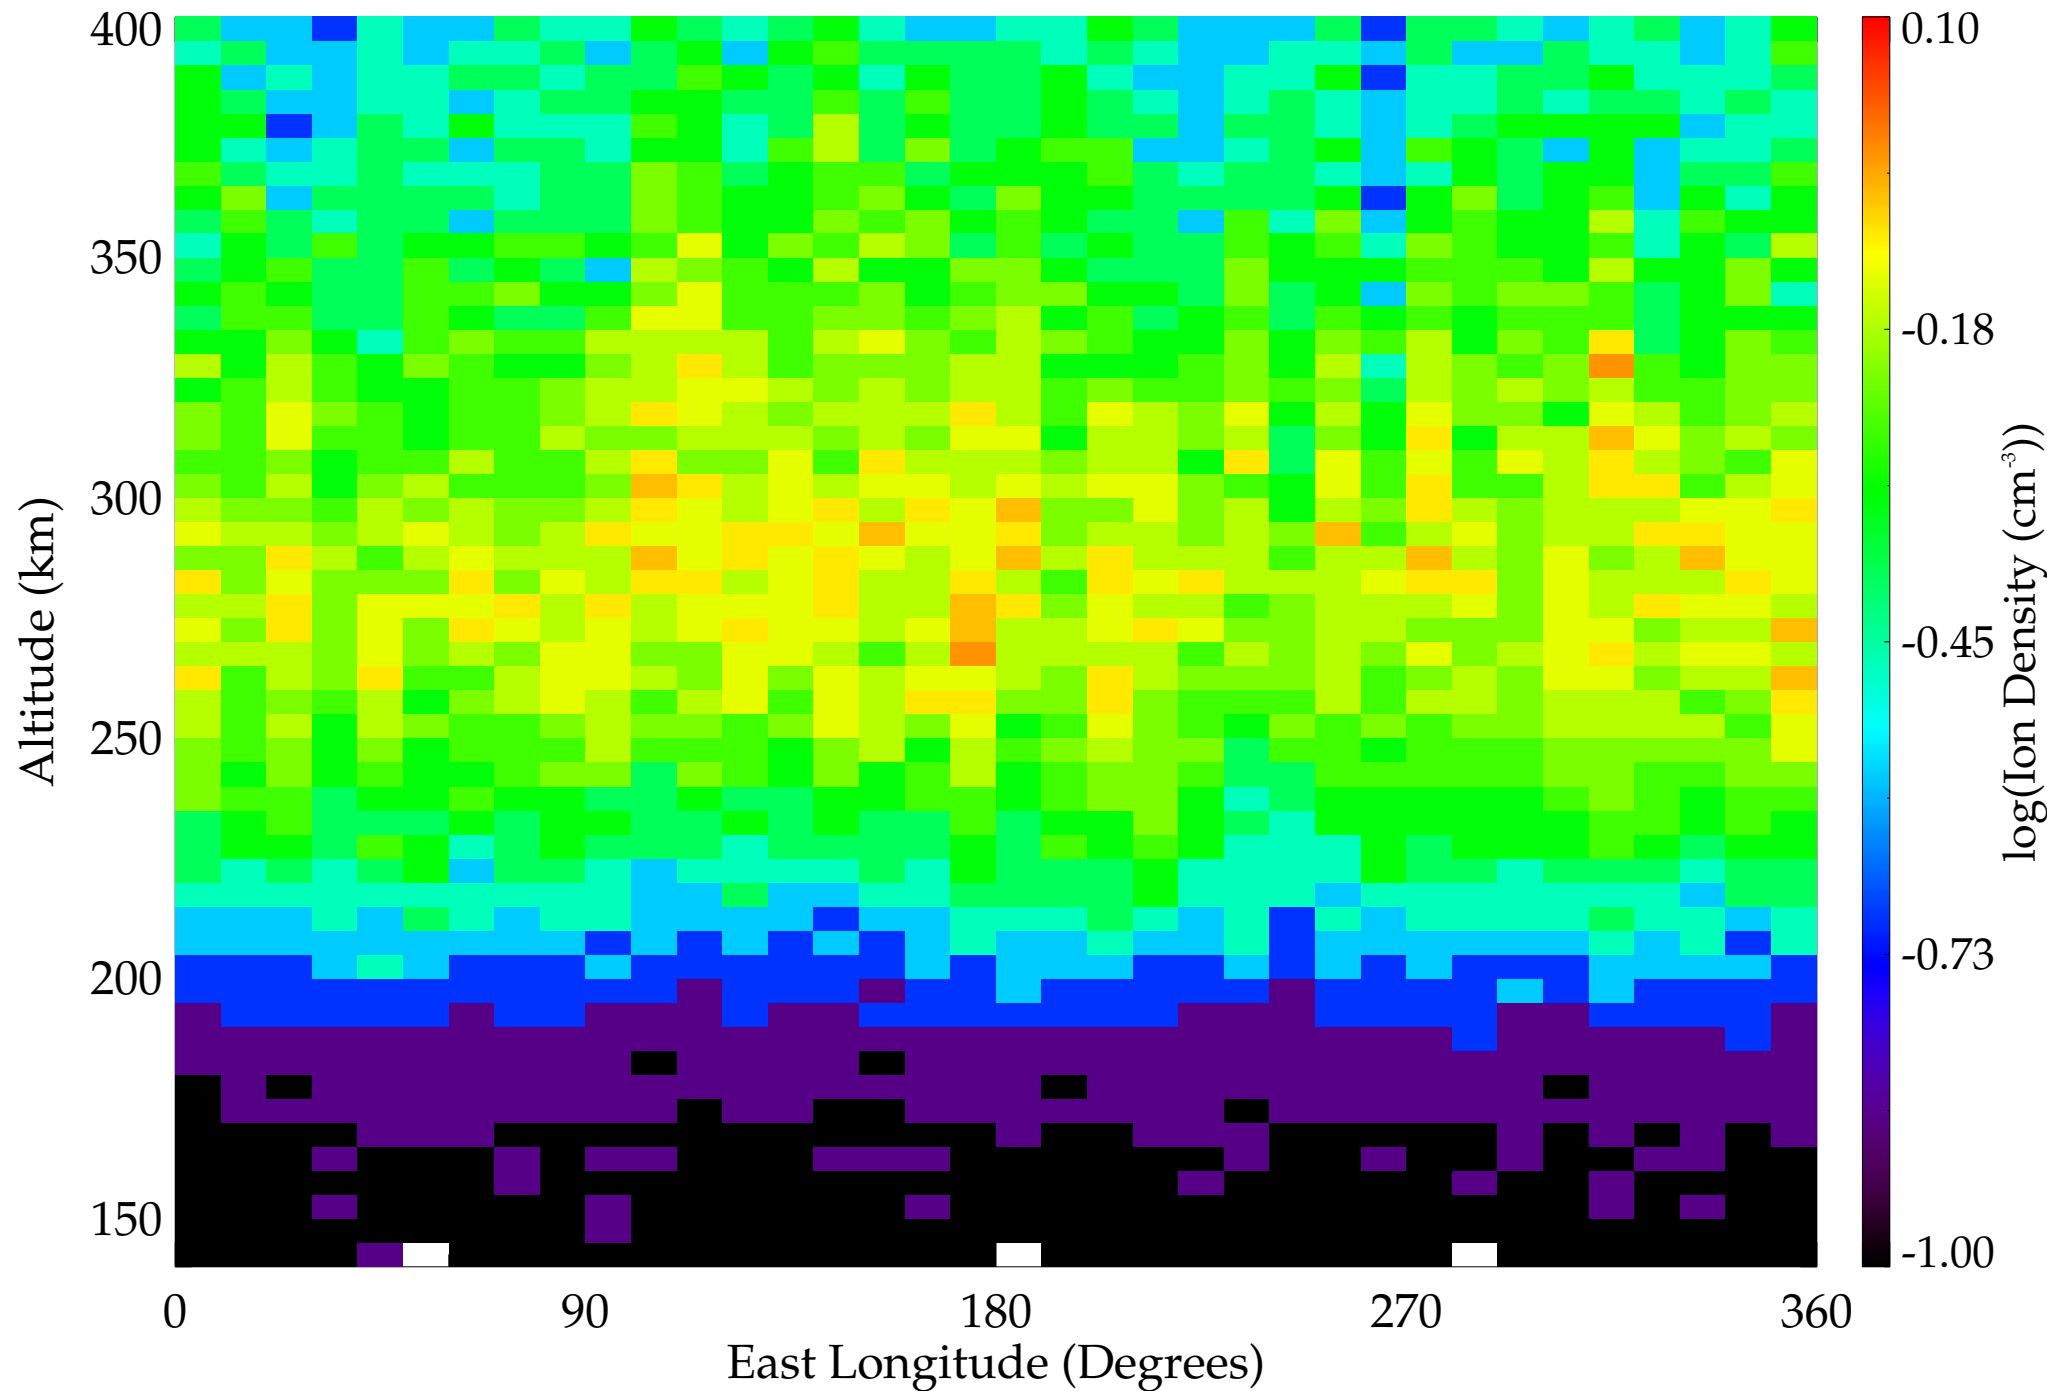

# Mass Number: 12

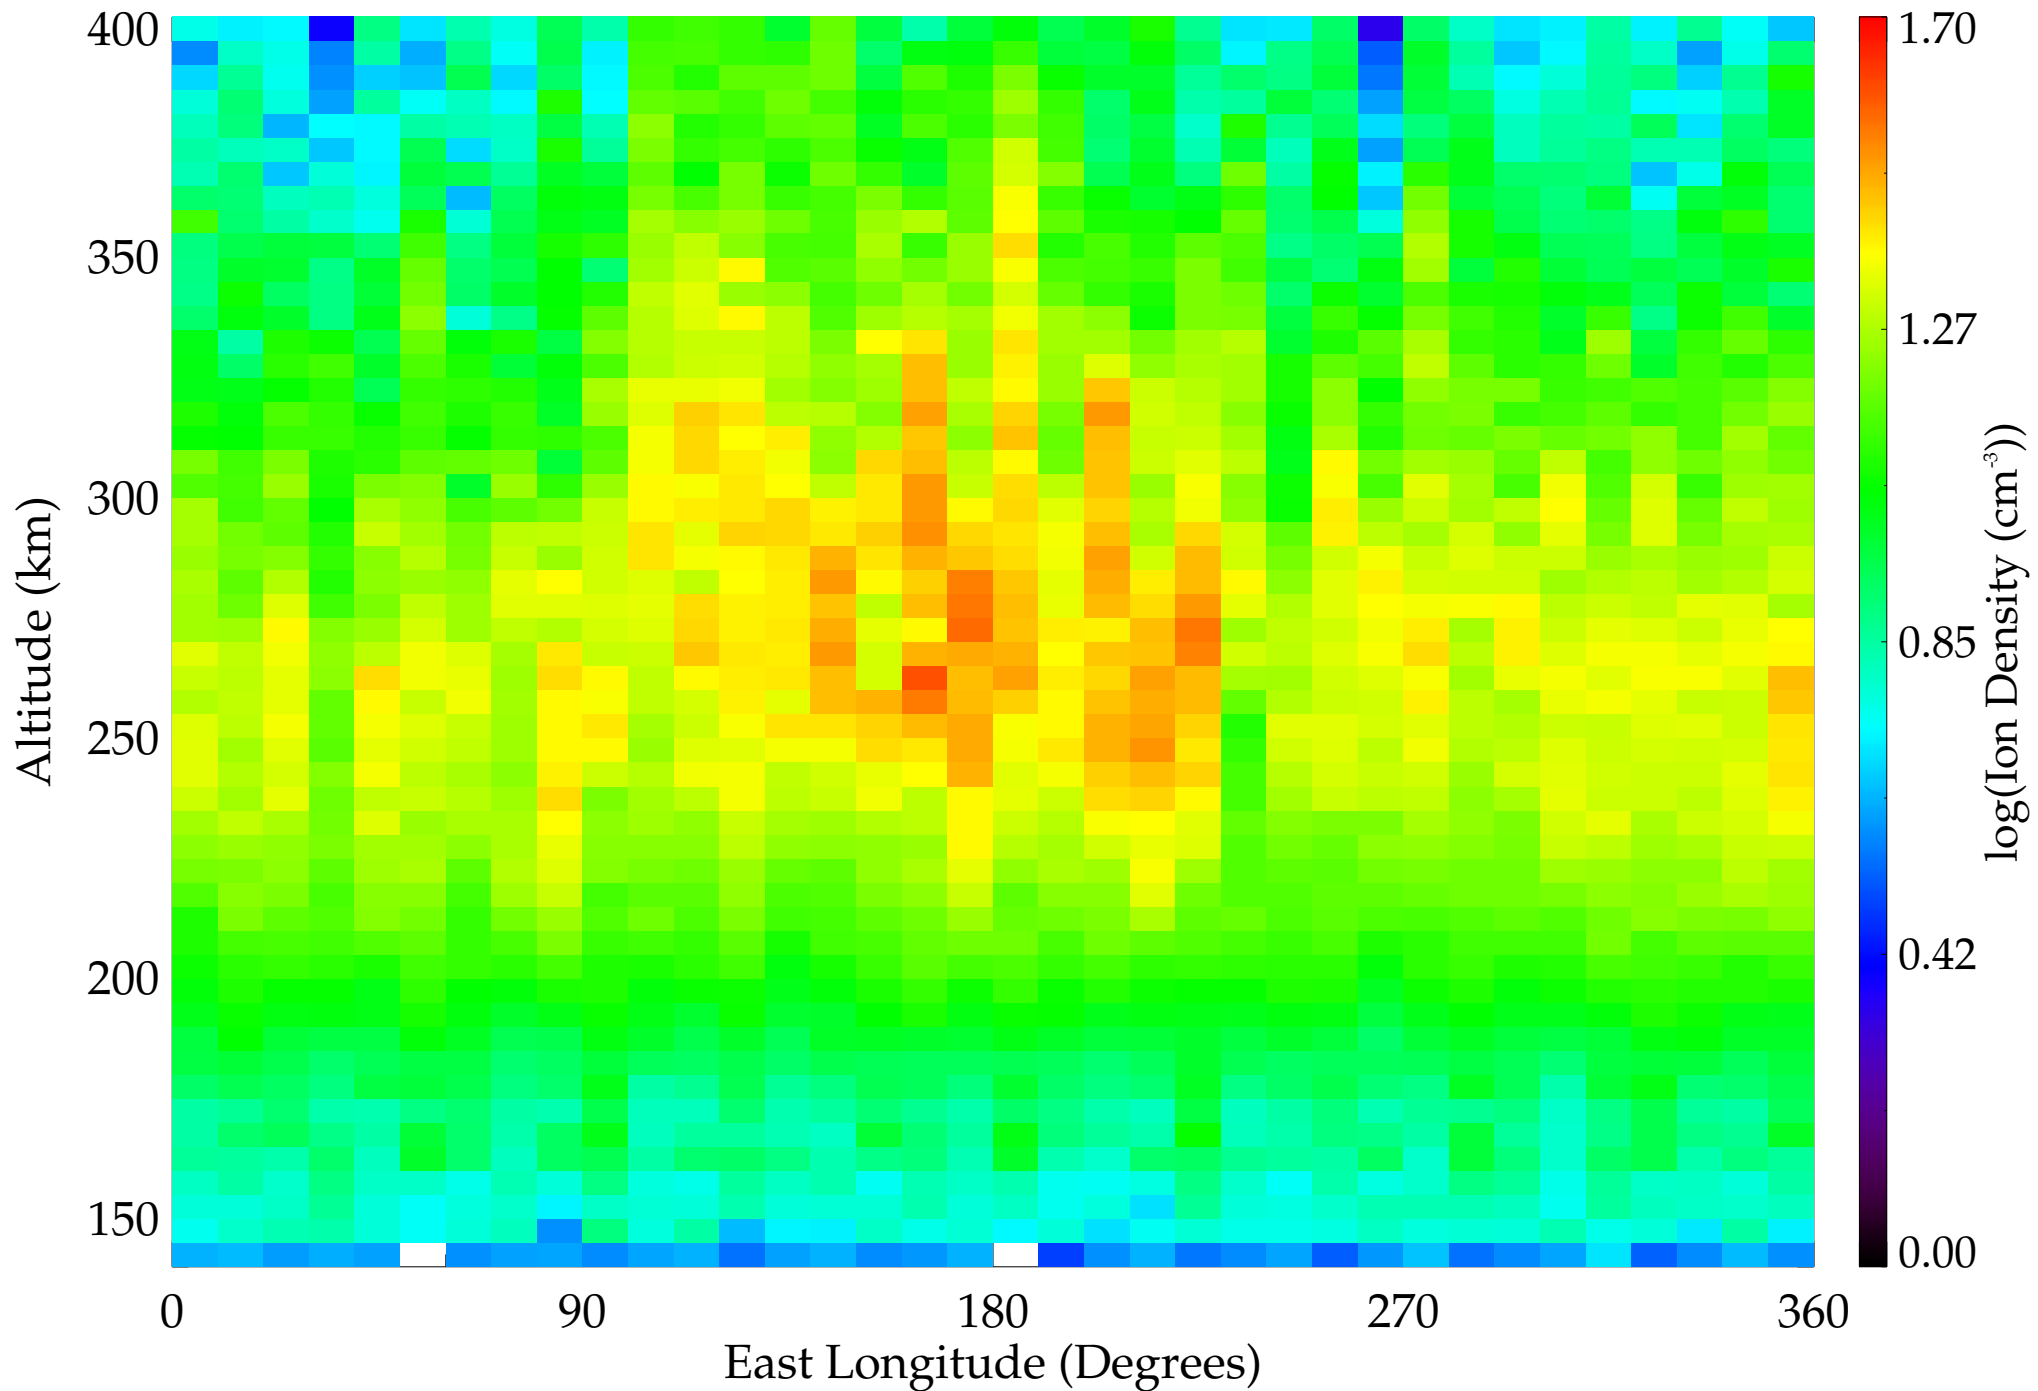

# Mass Number: 13

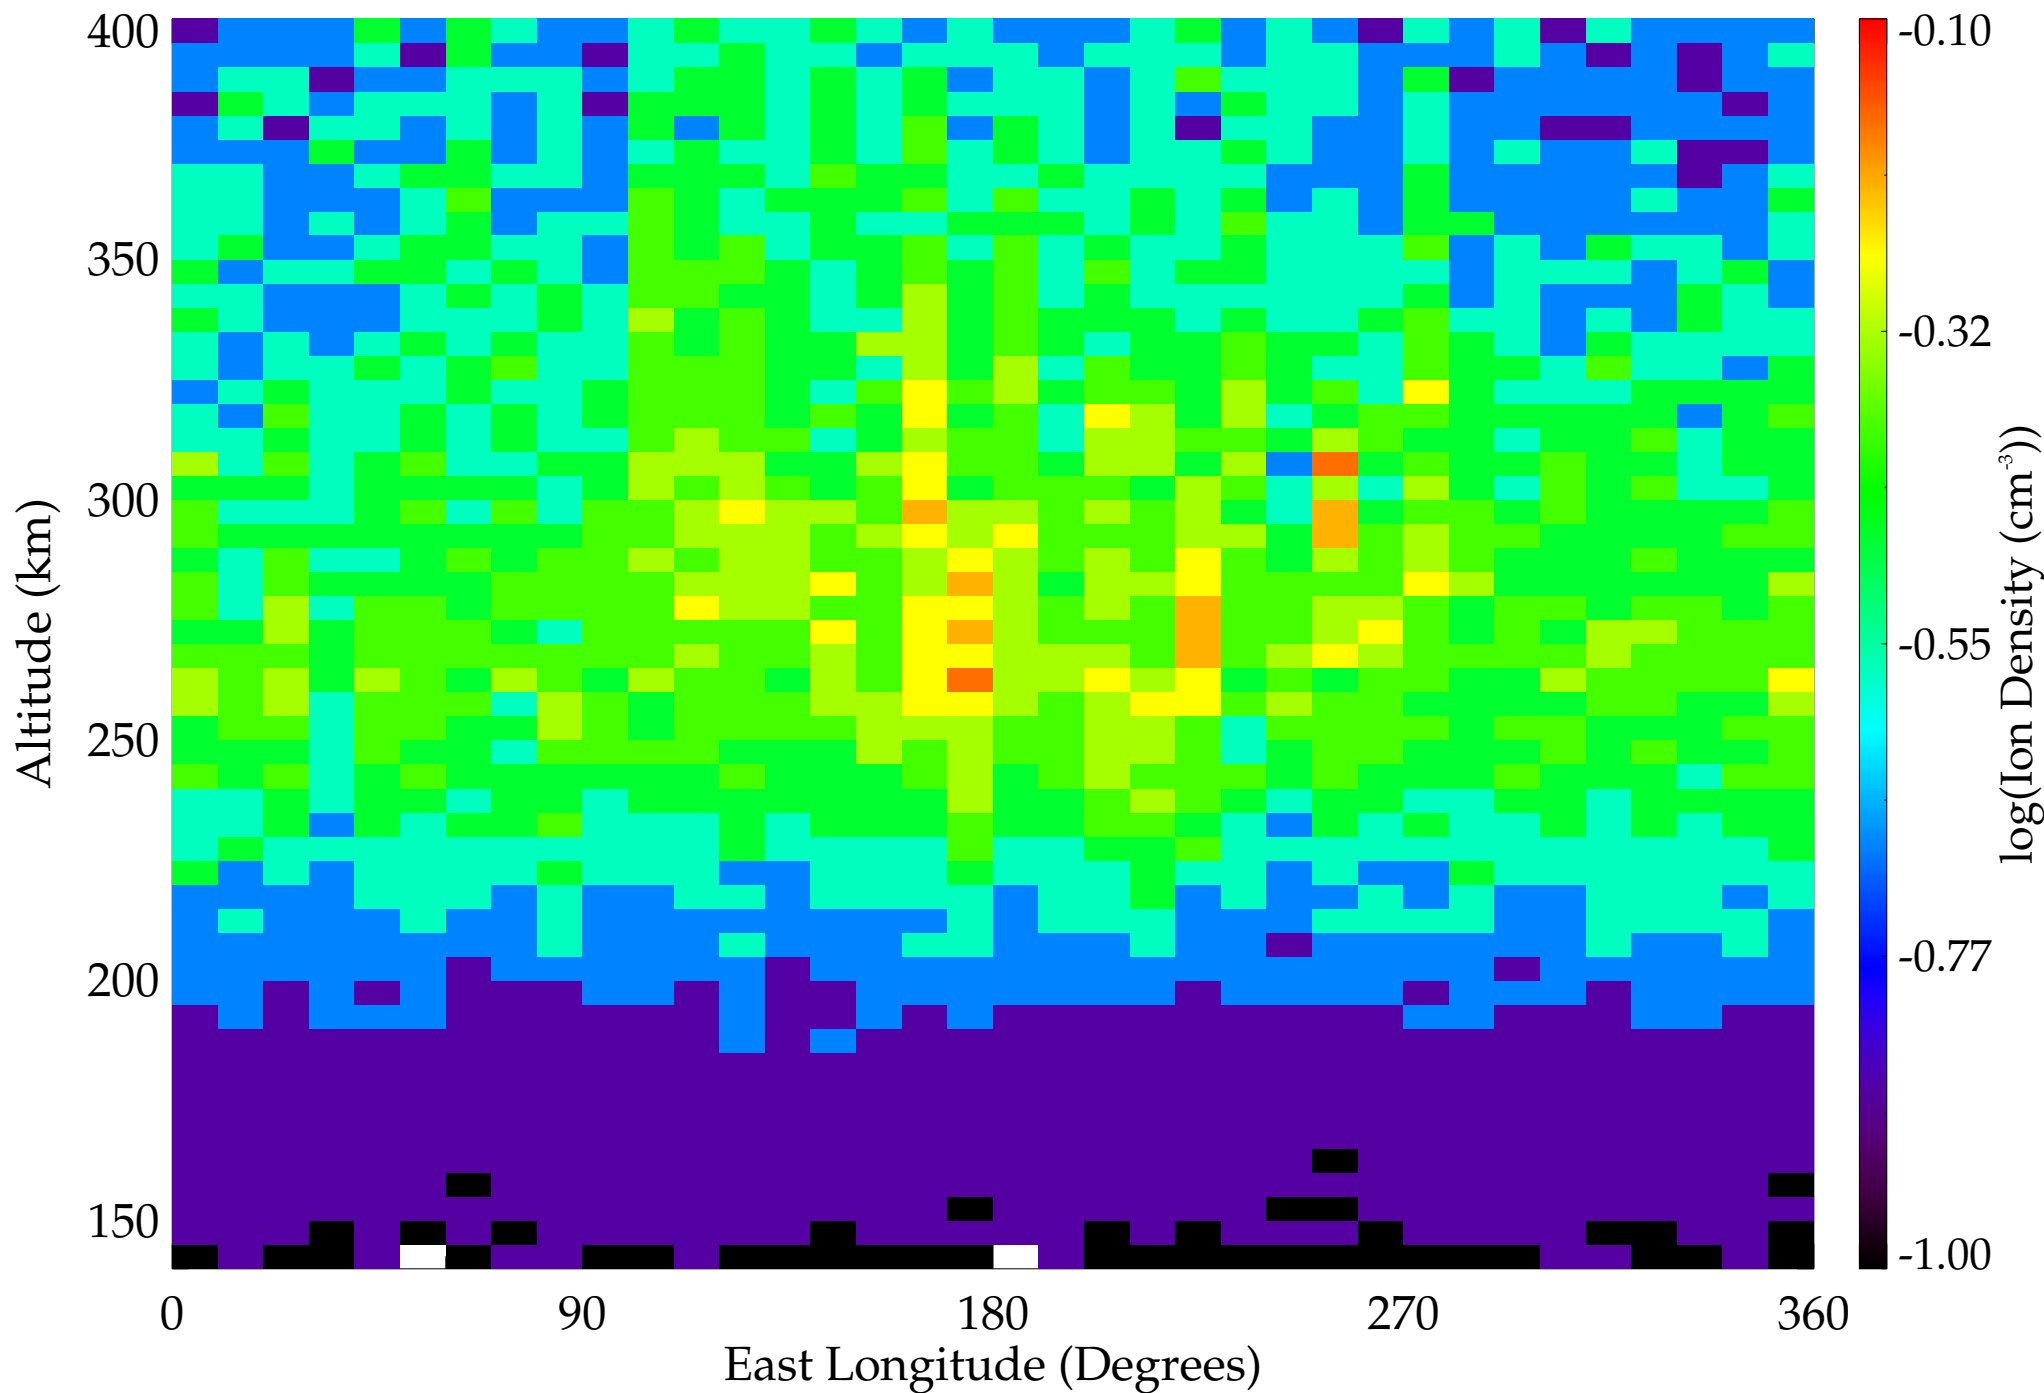

# Mass Number: 14

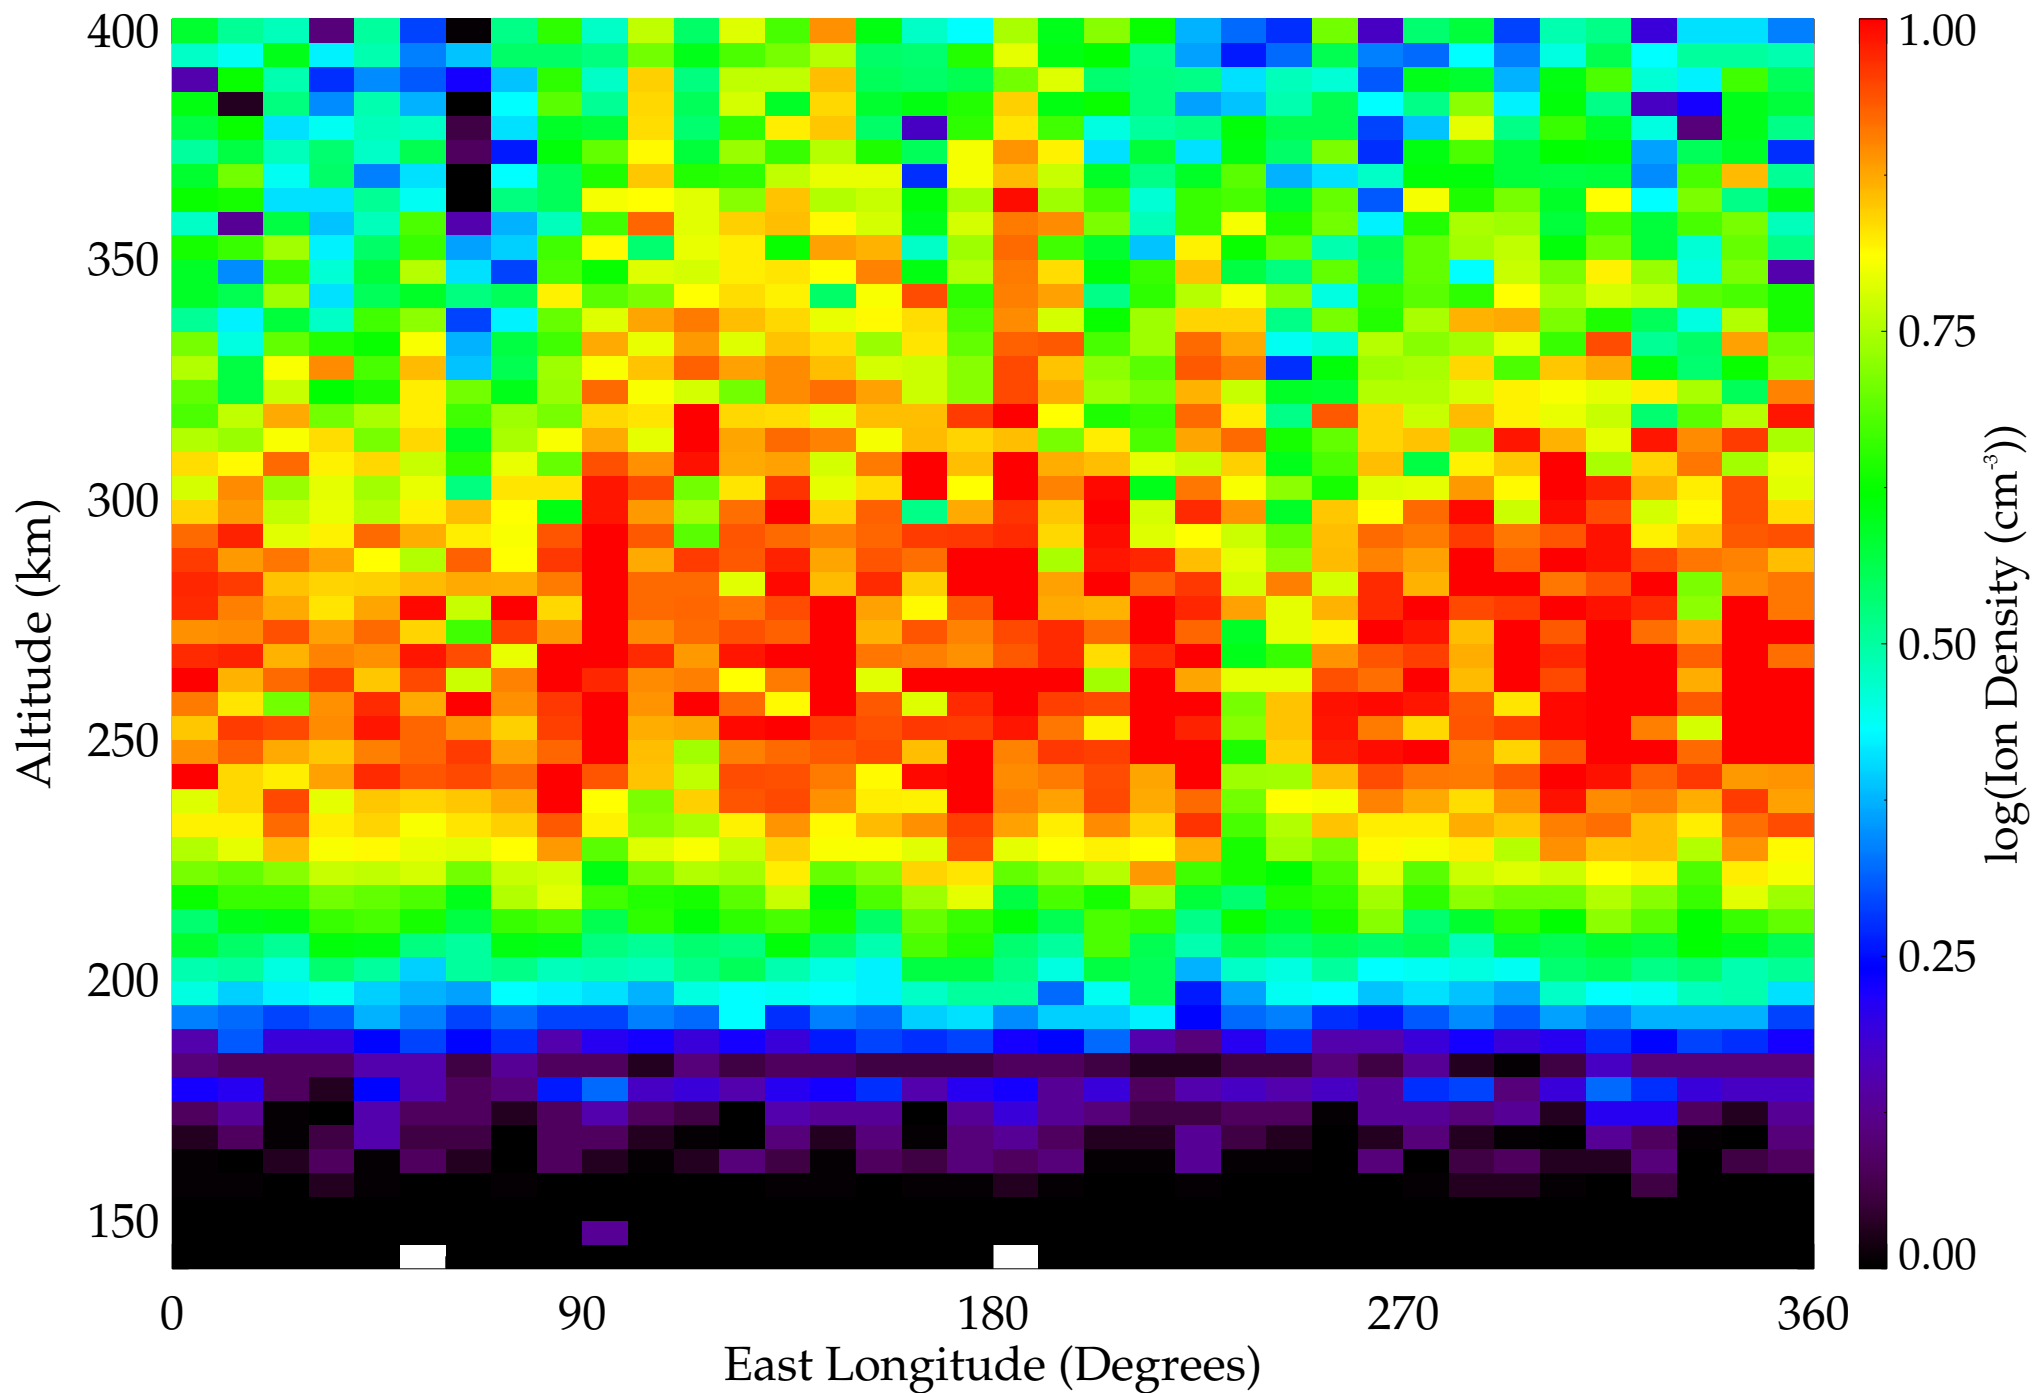



# Mass Number: 15

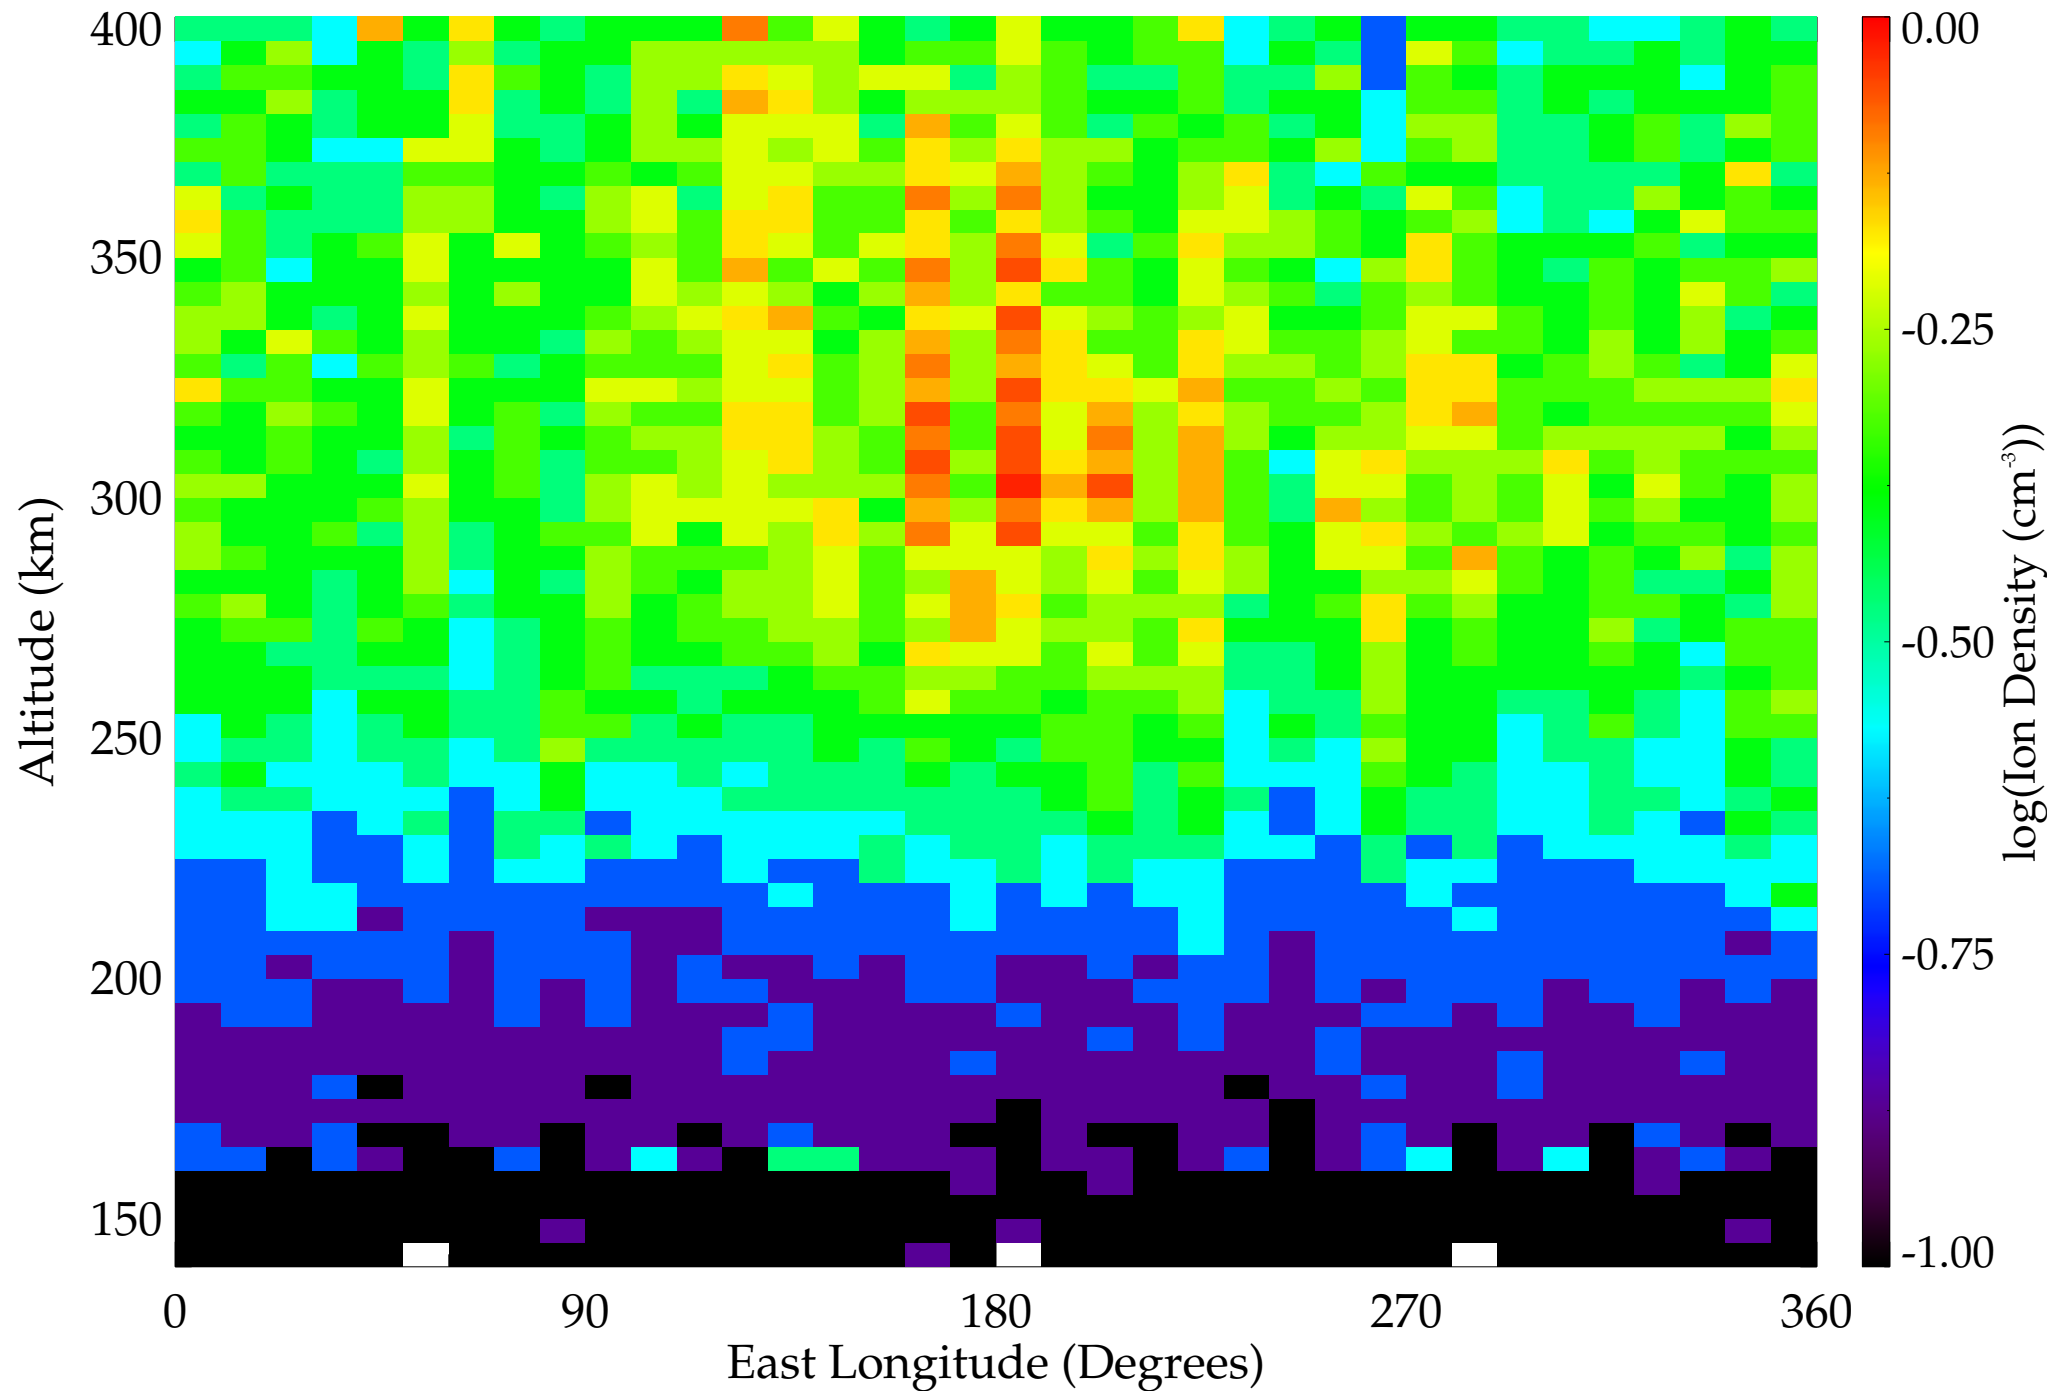

# Mass Number: 16

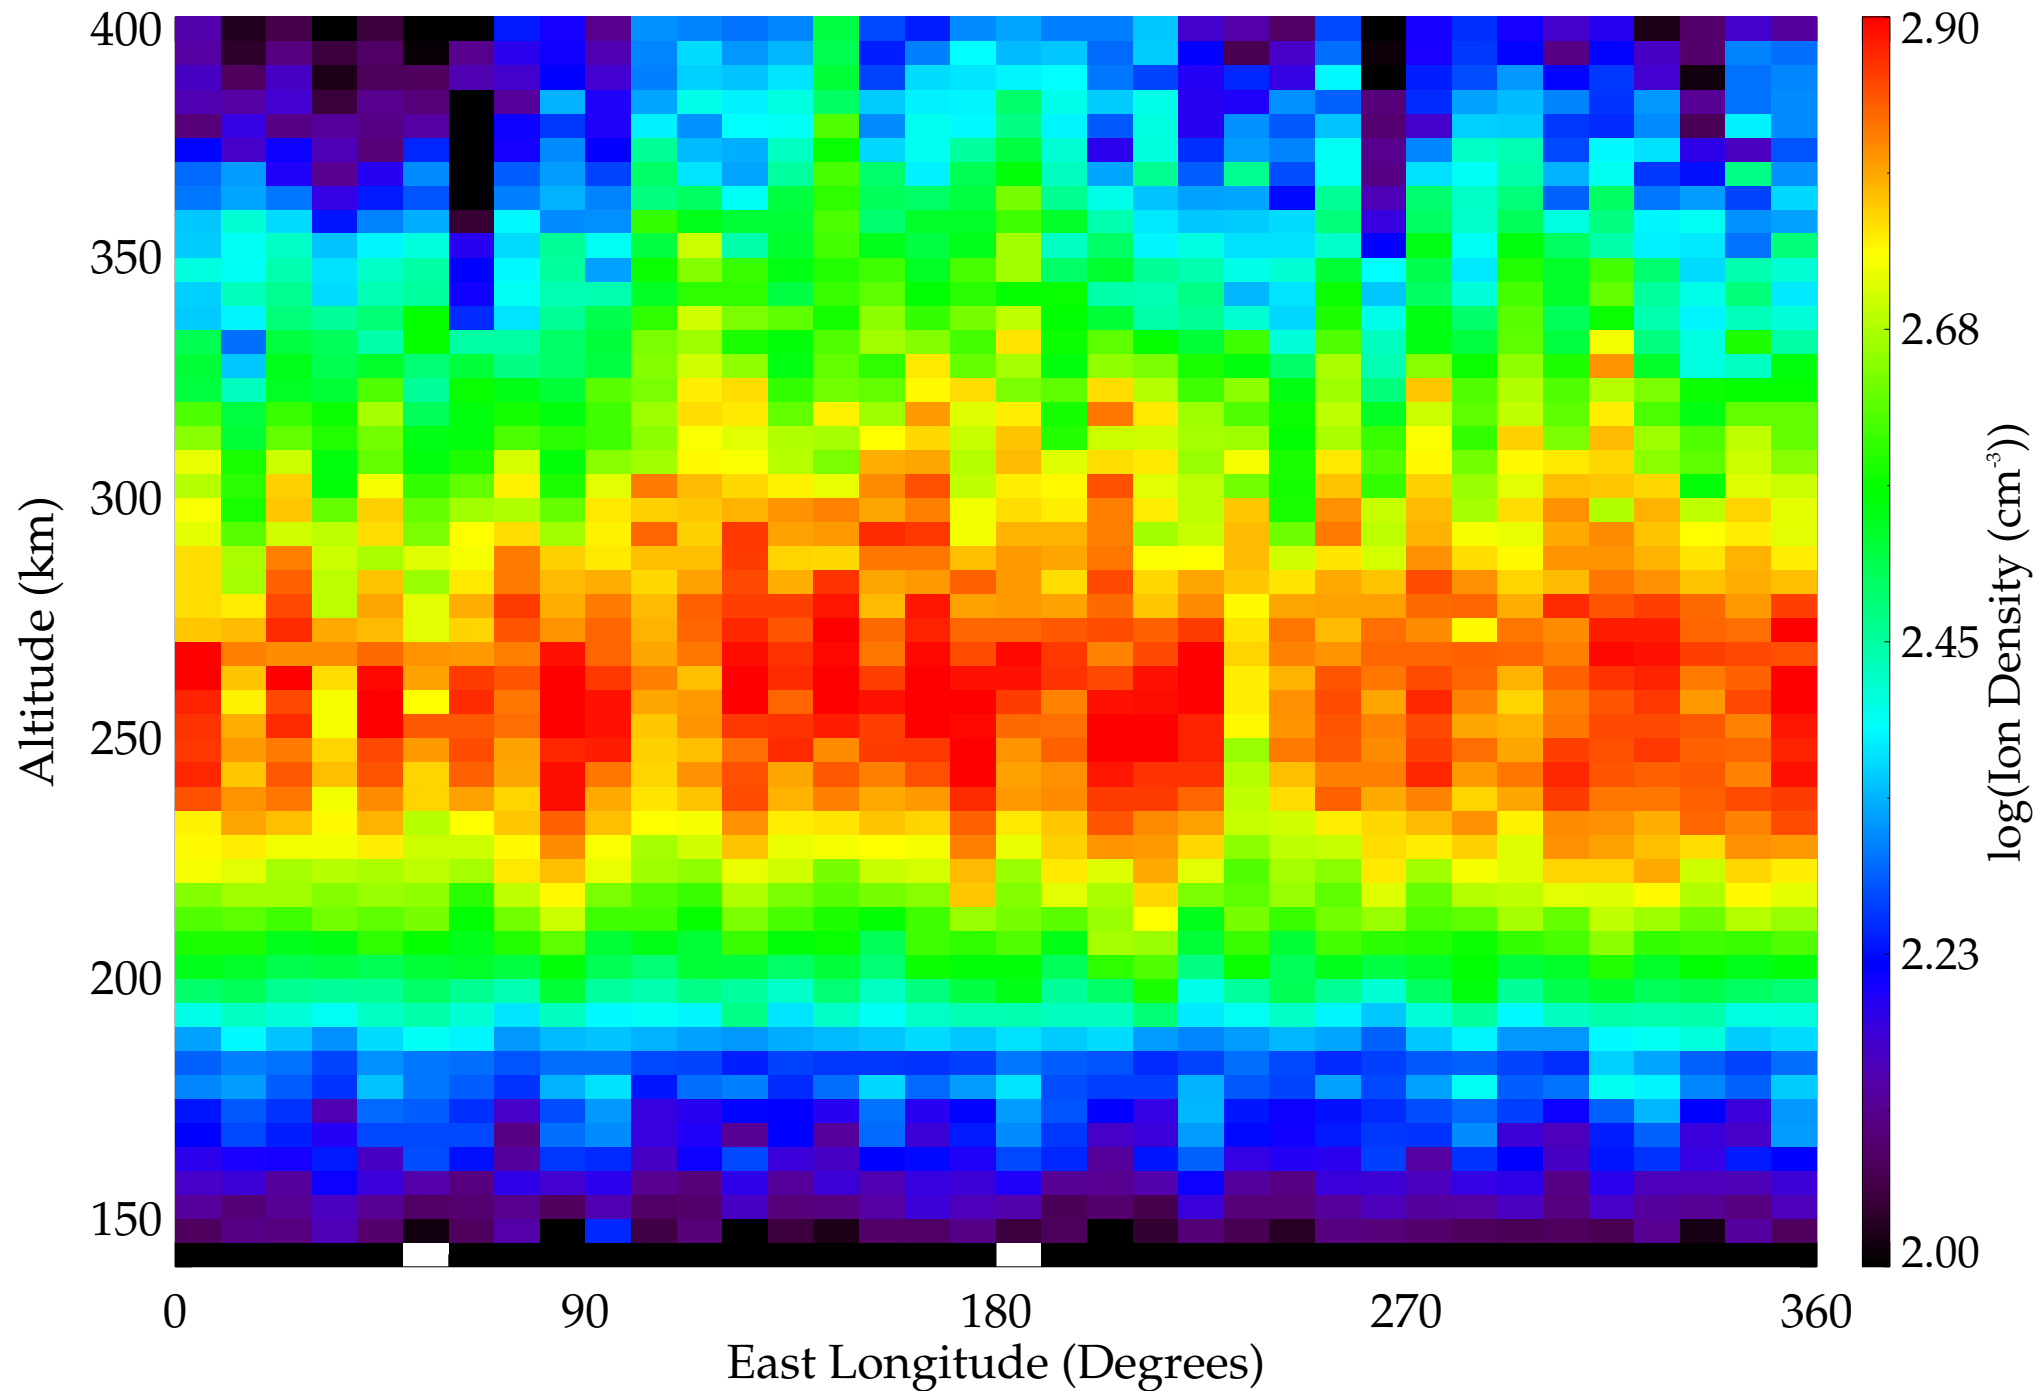

# Mass Number: 17

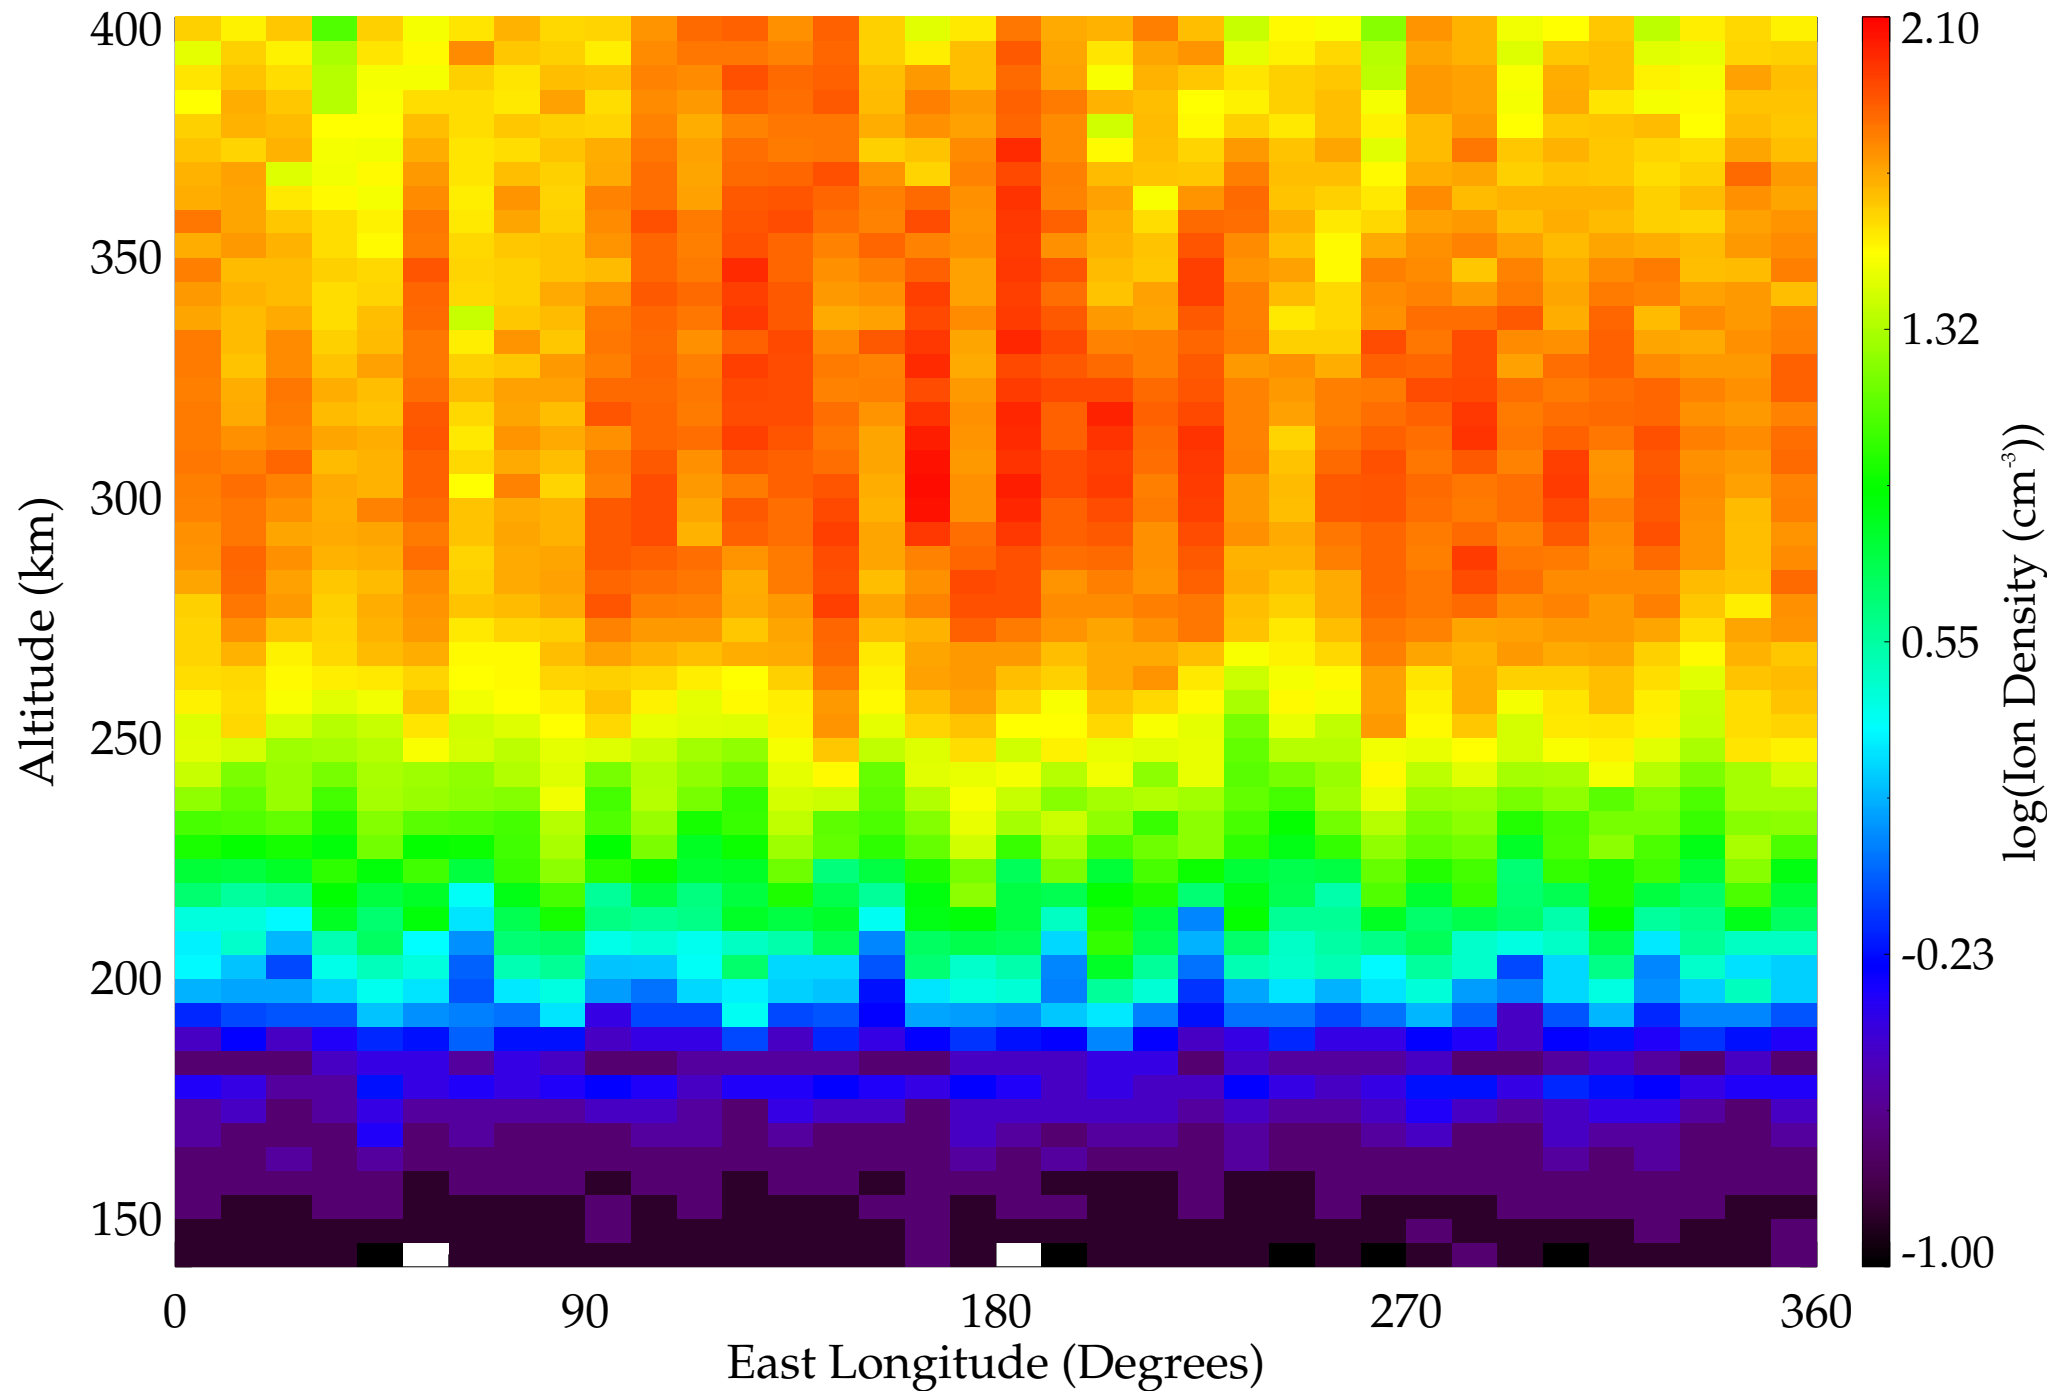

# Mass Number: 18

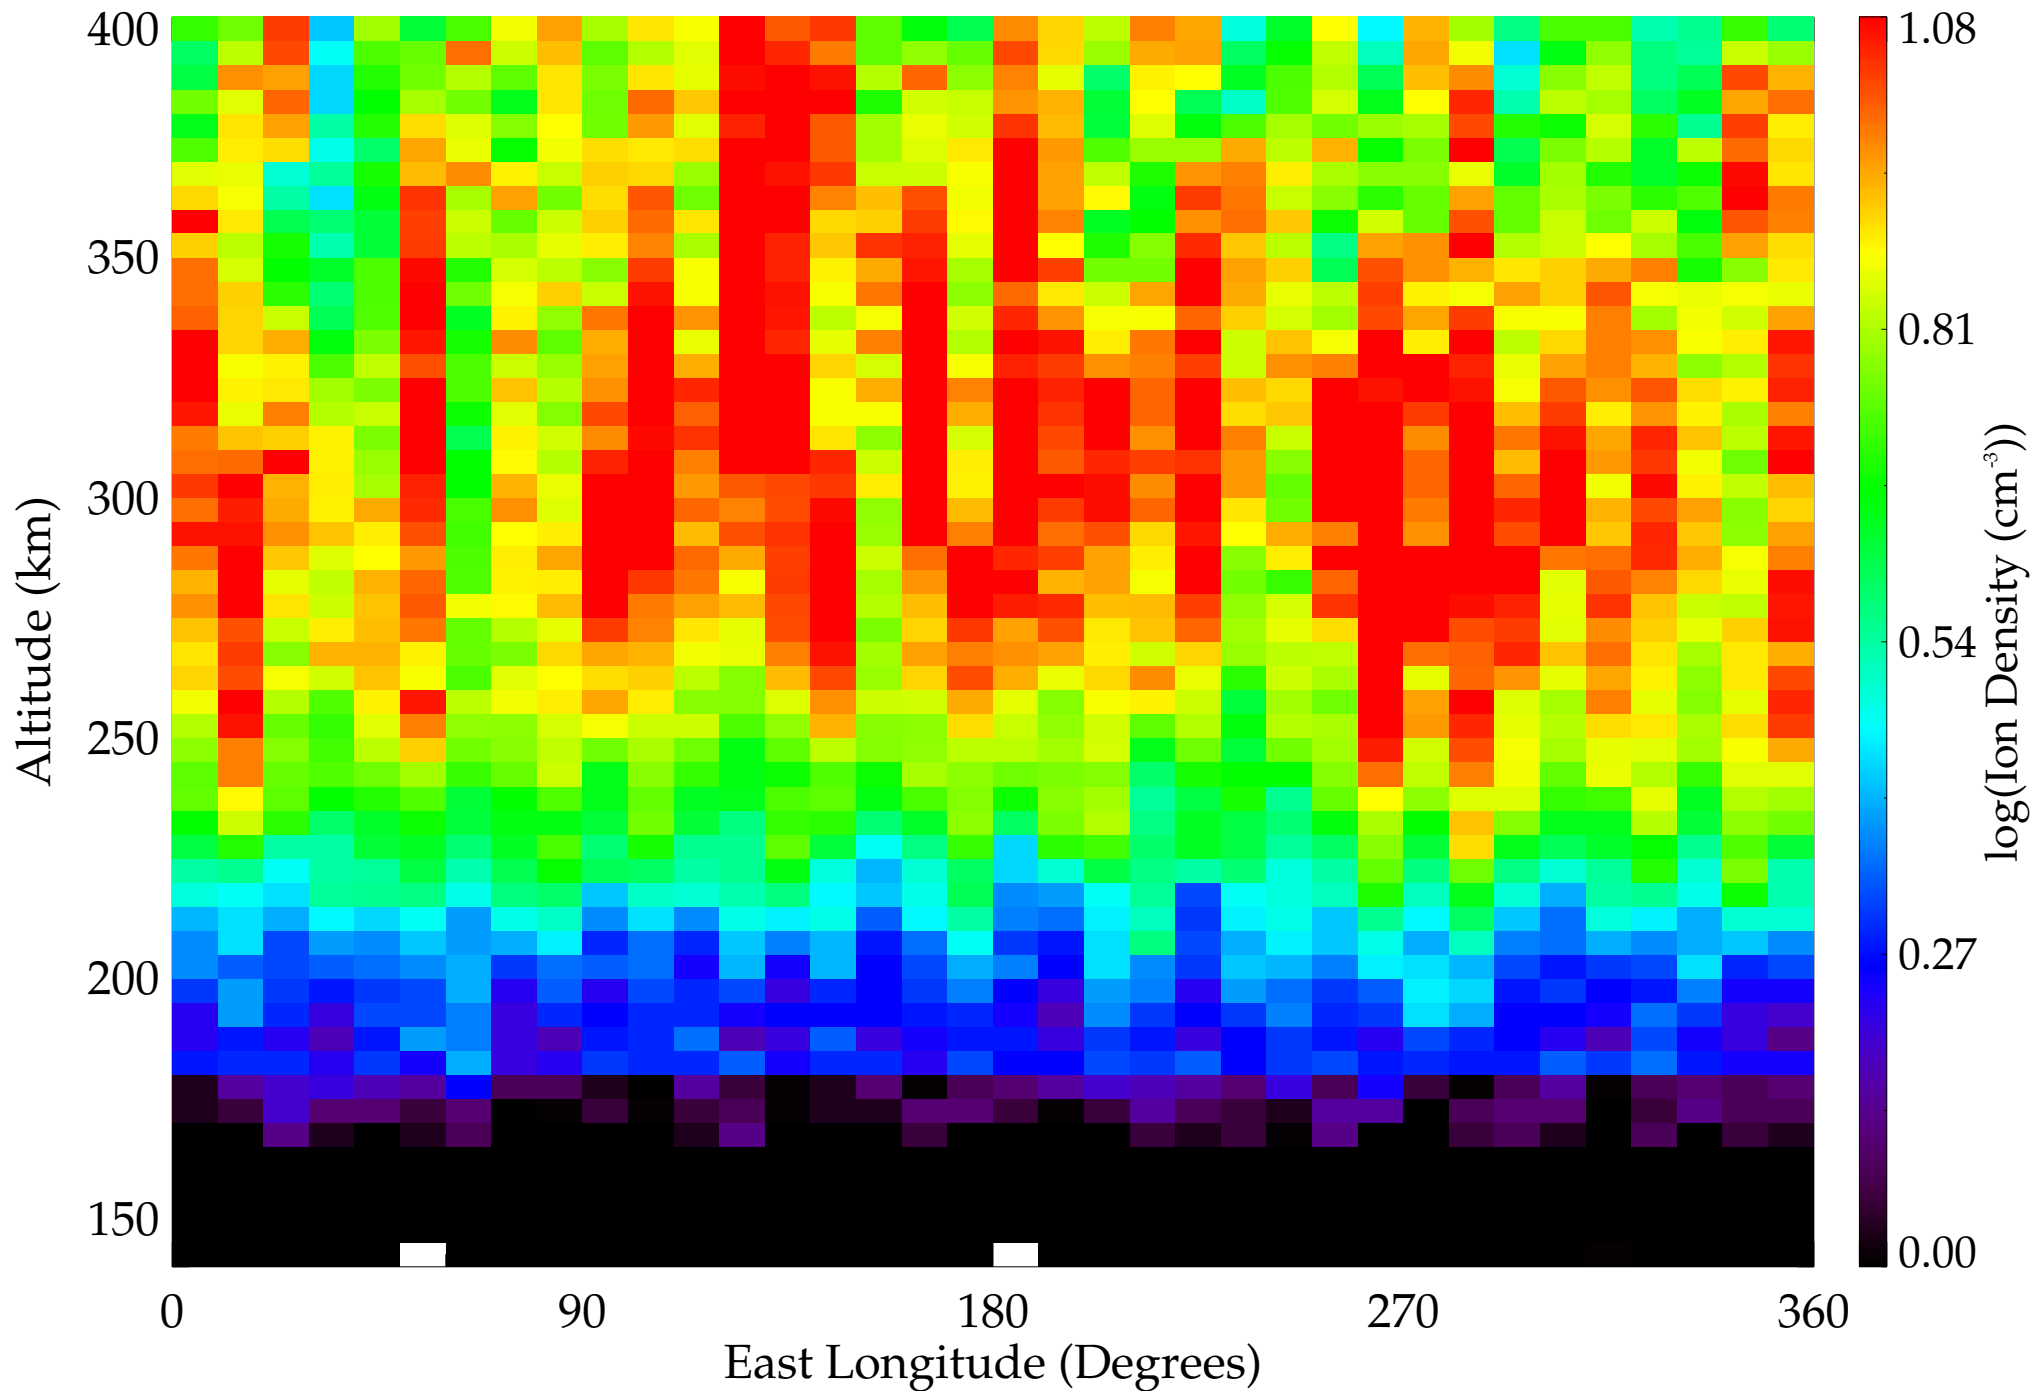

# Mass Number: 19

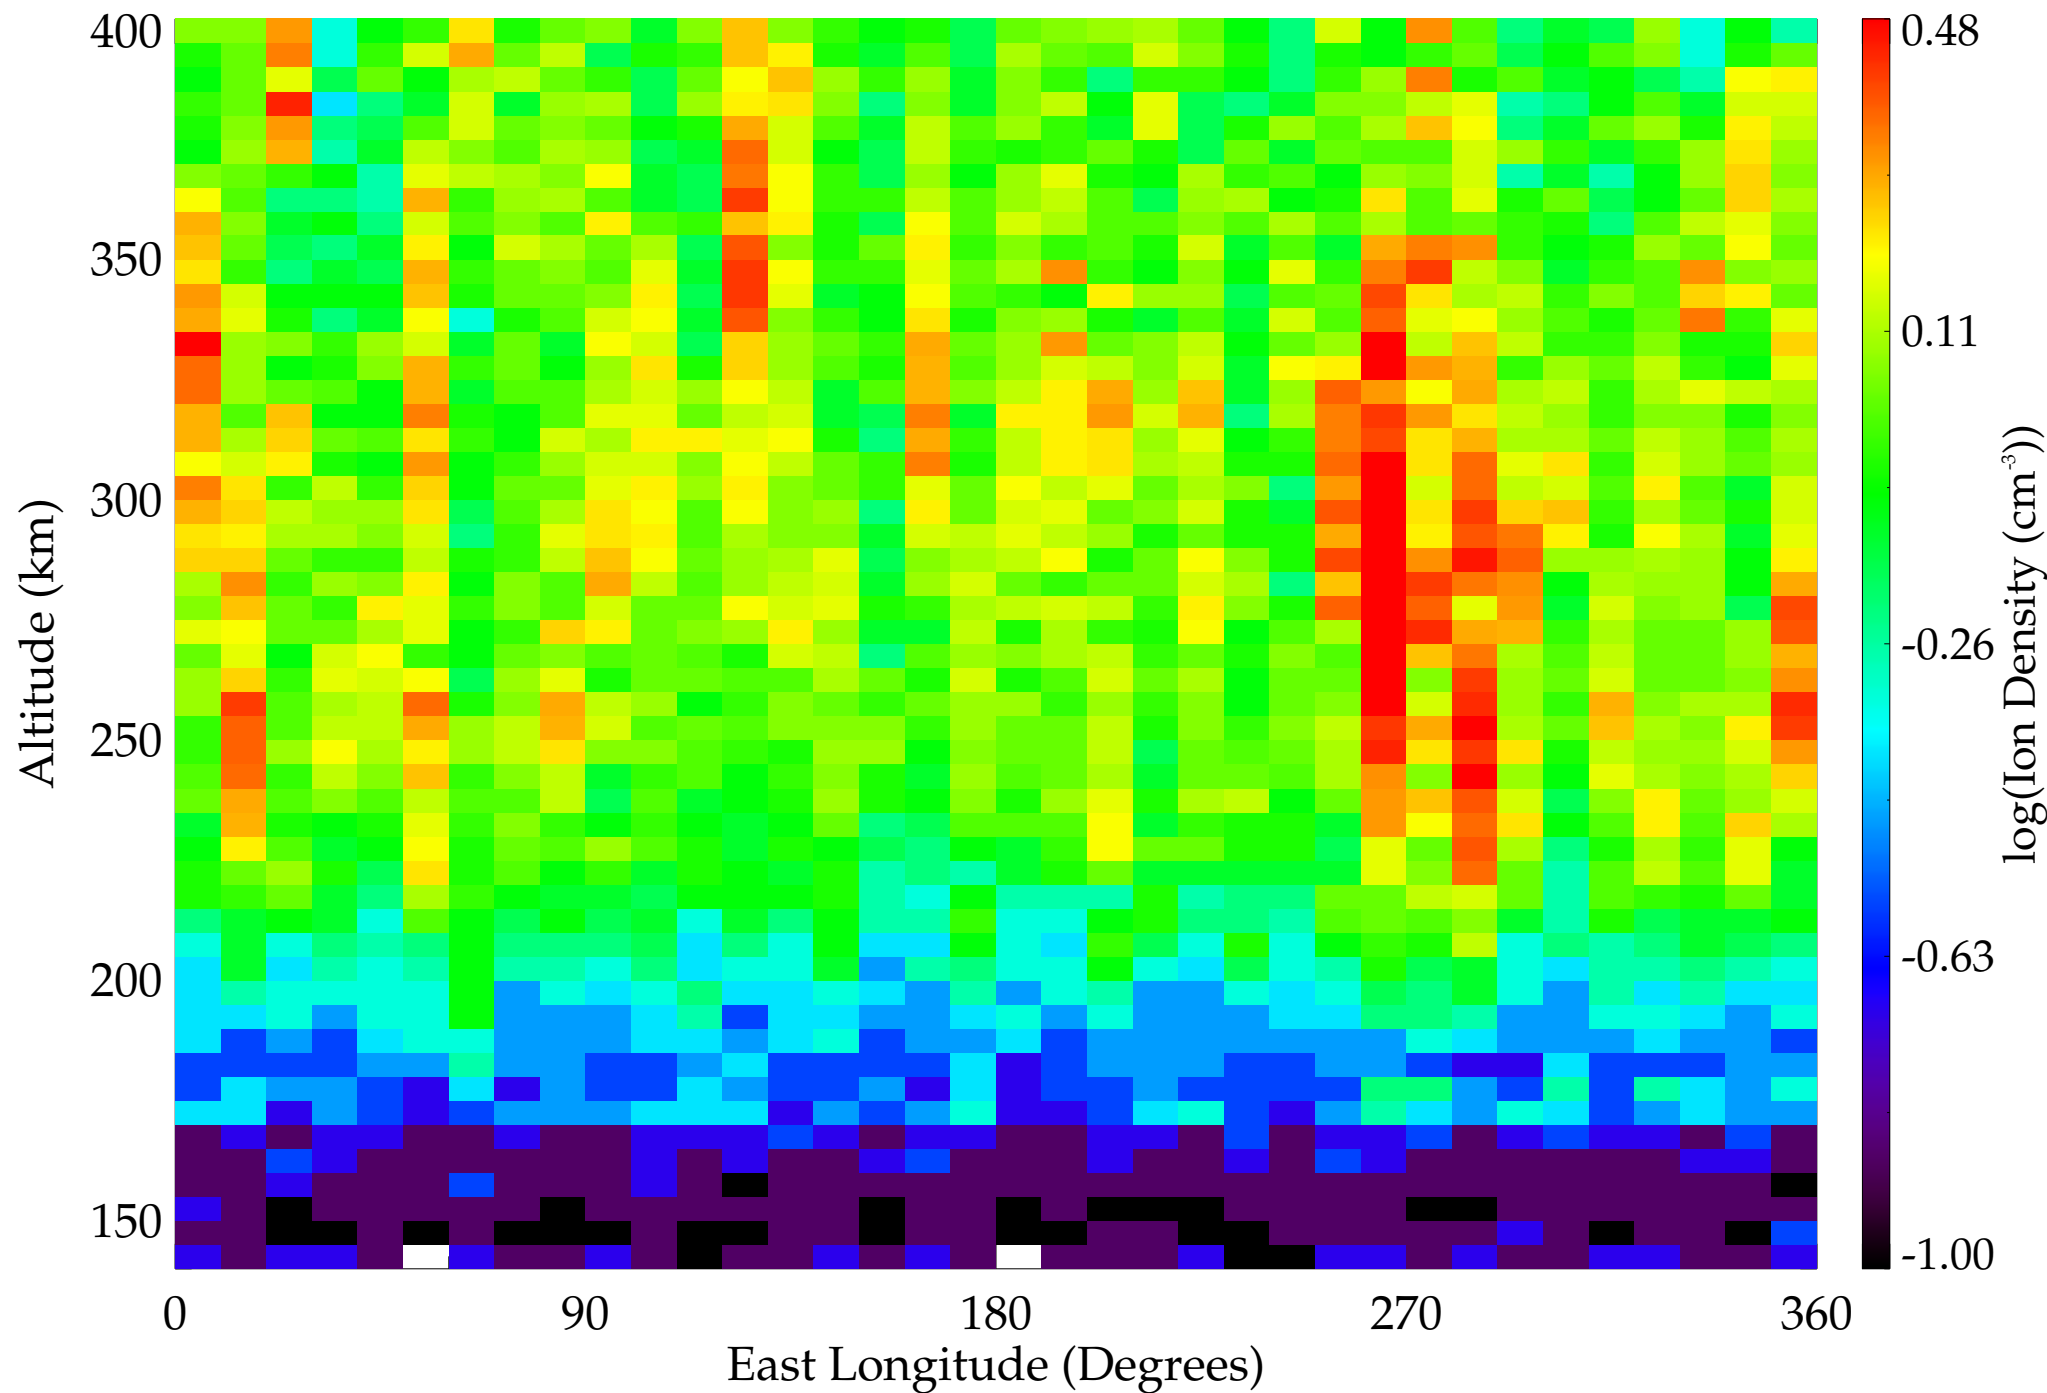

# Mass Number: 20

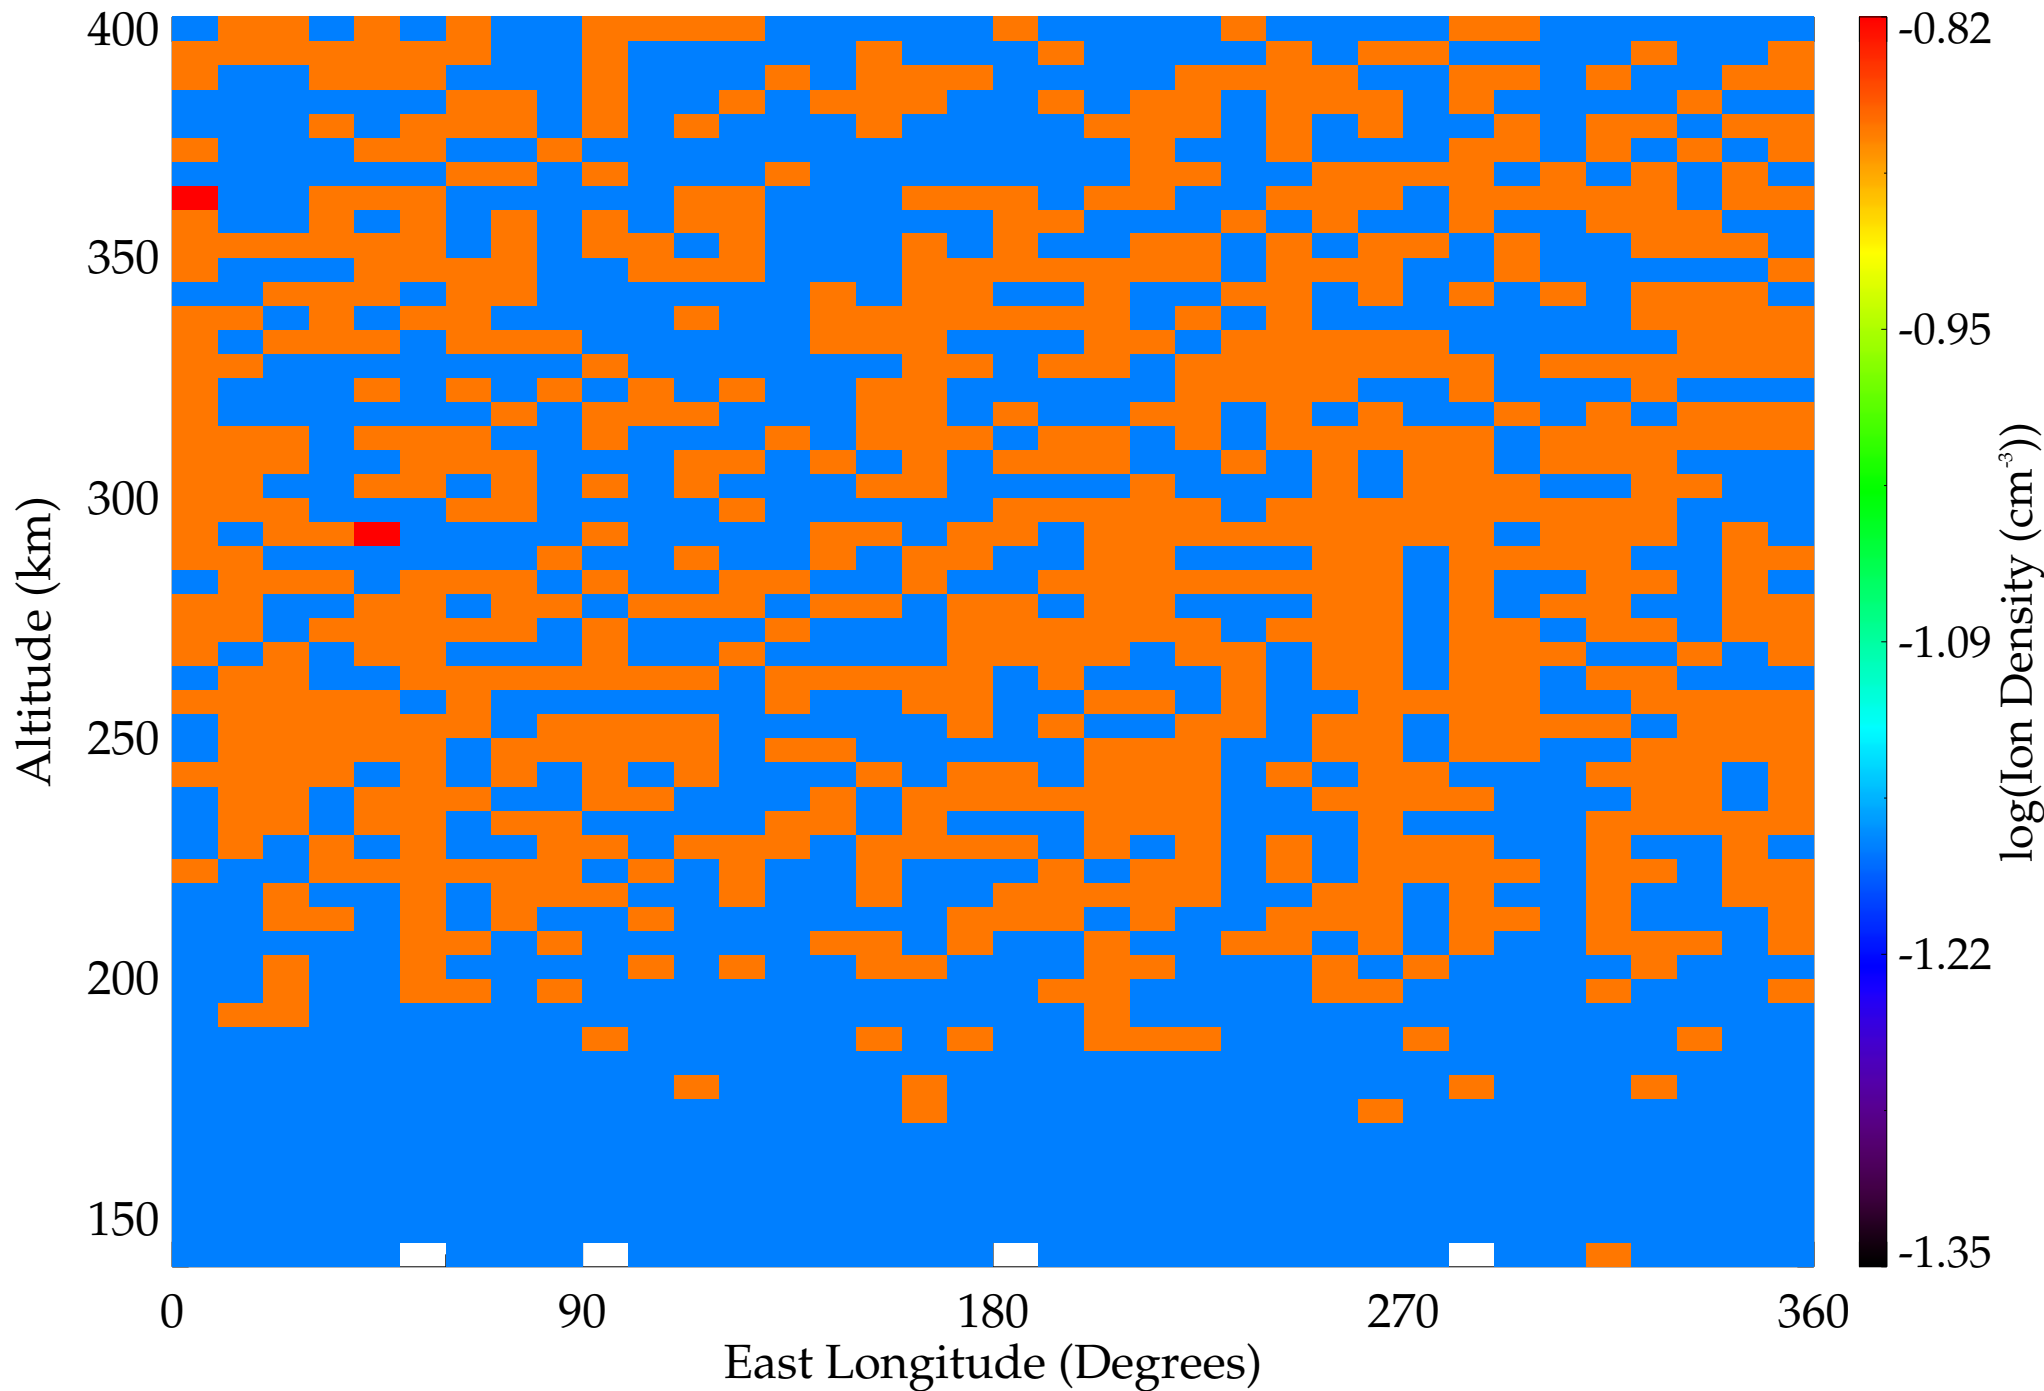

# Mass Number: 21

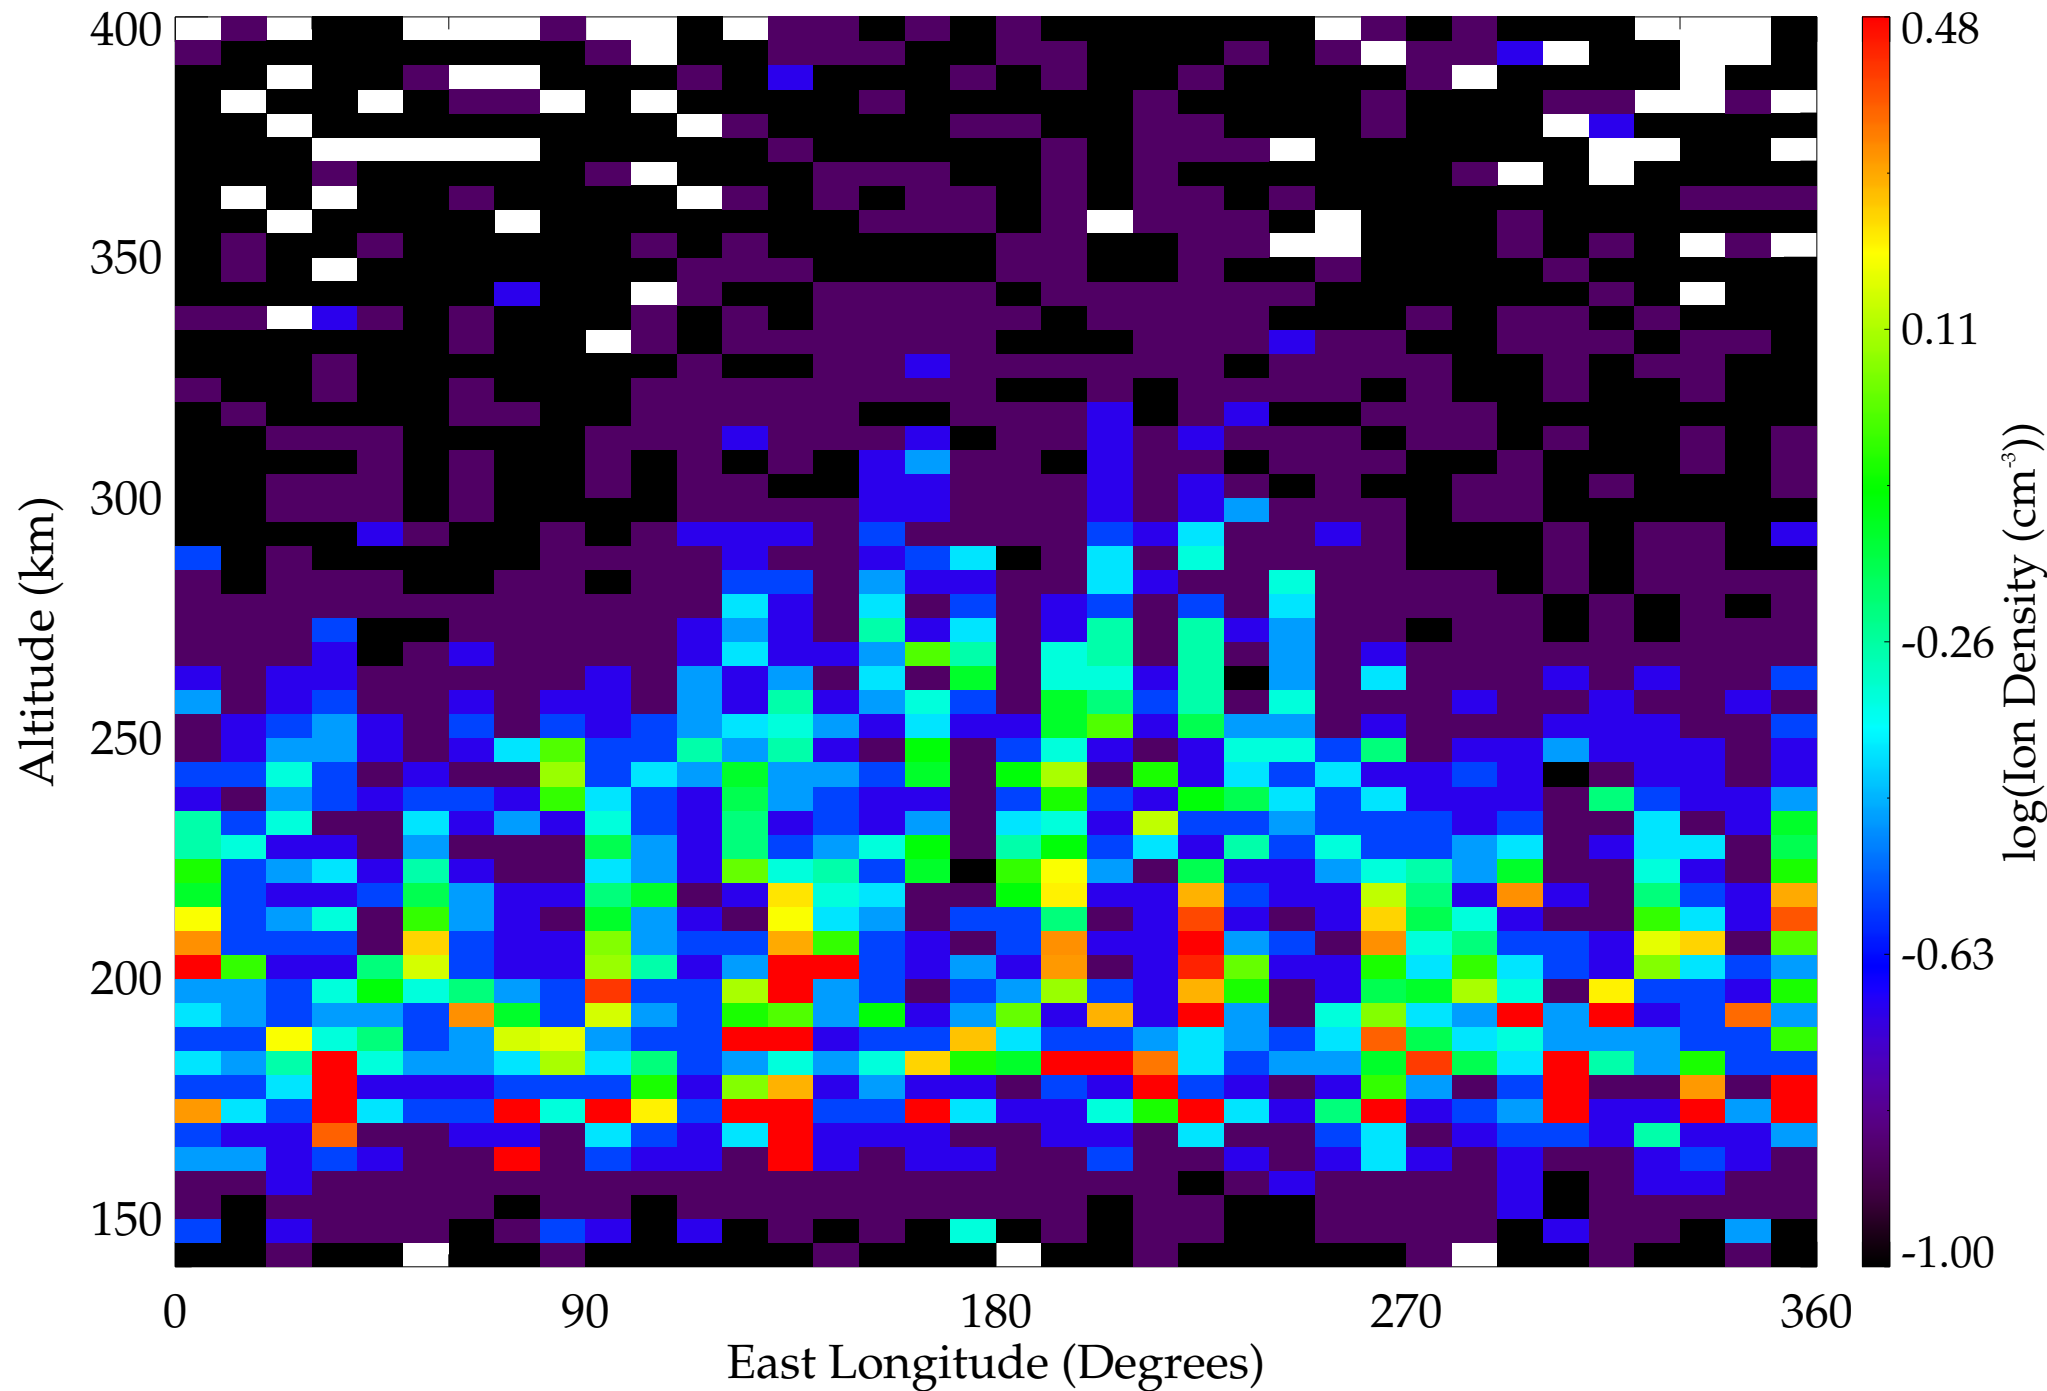

# Mass Number: 22

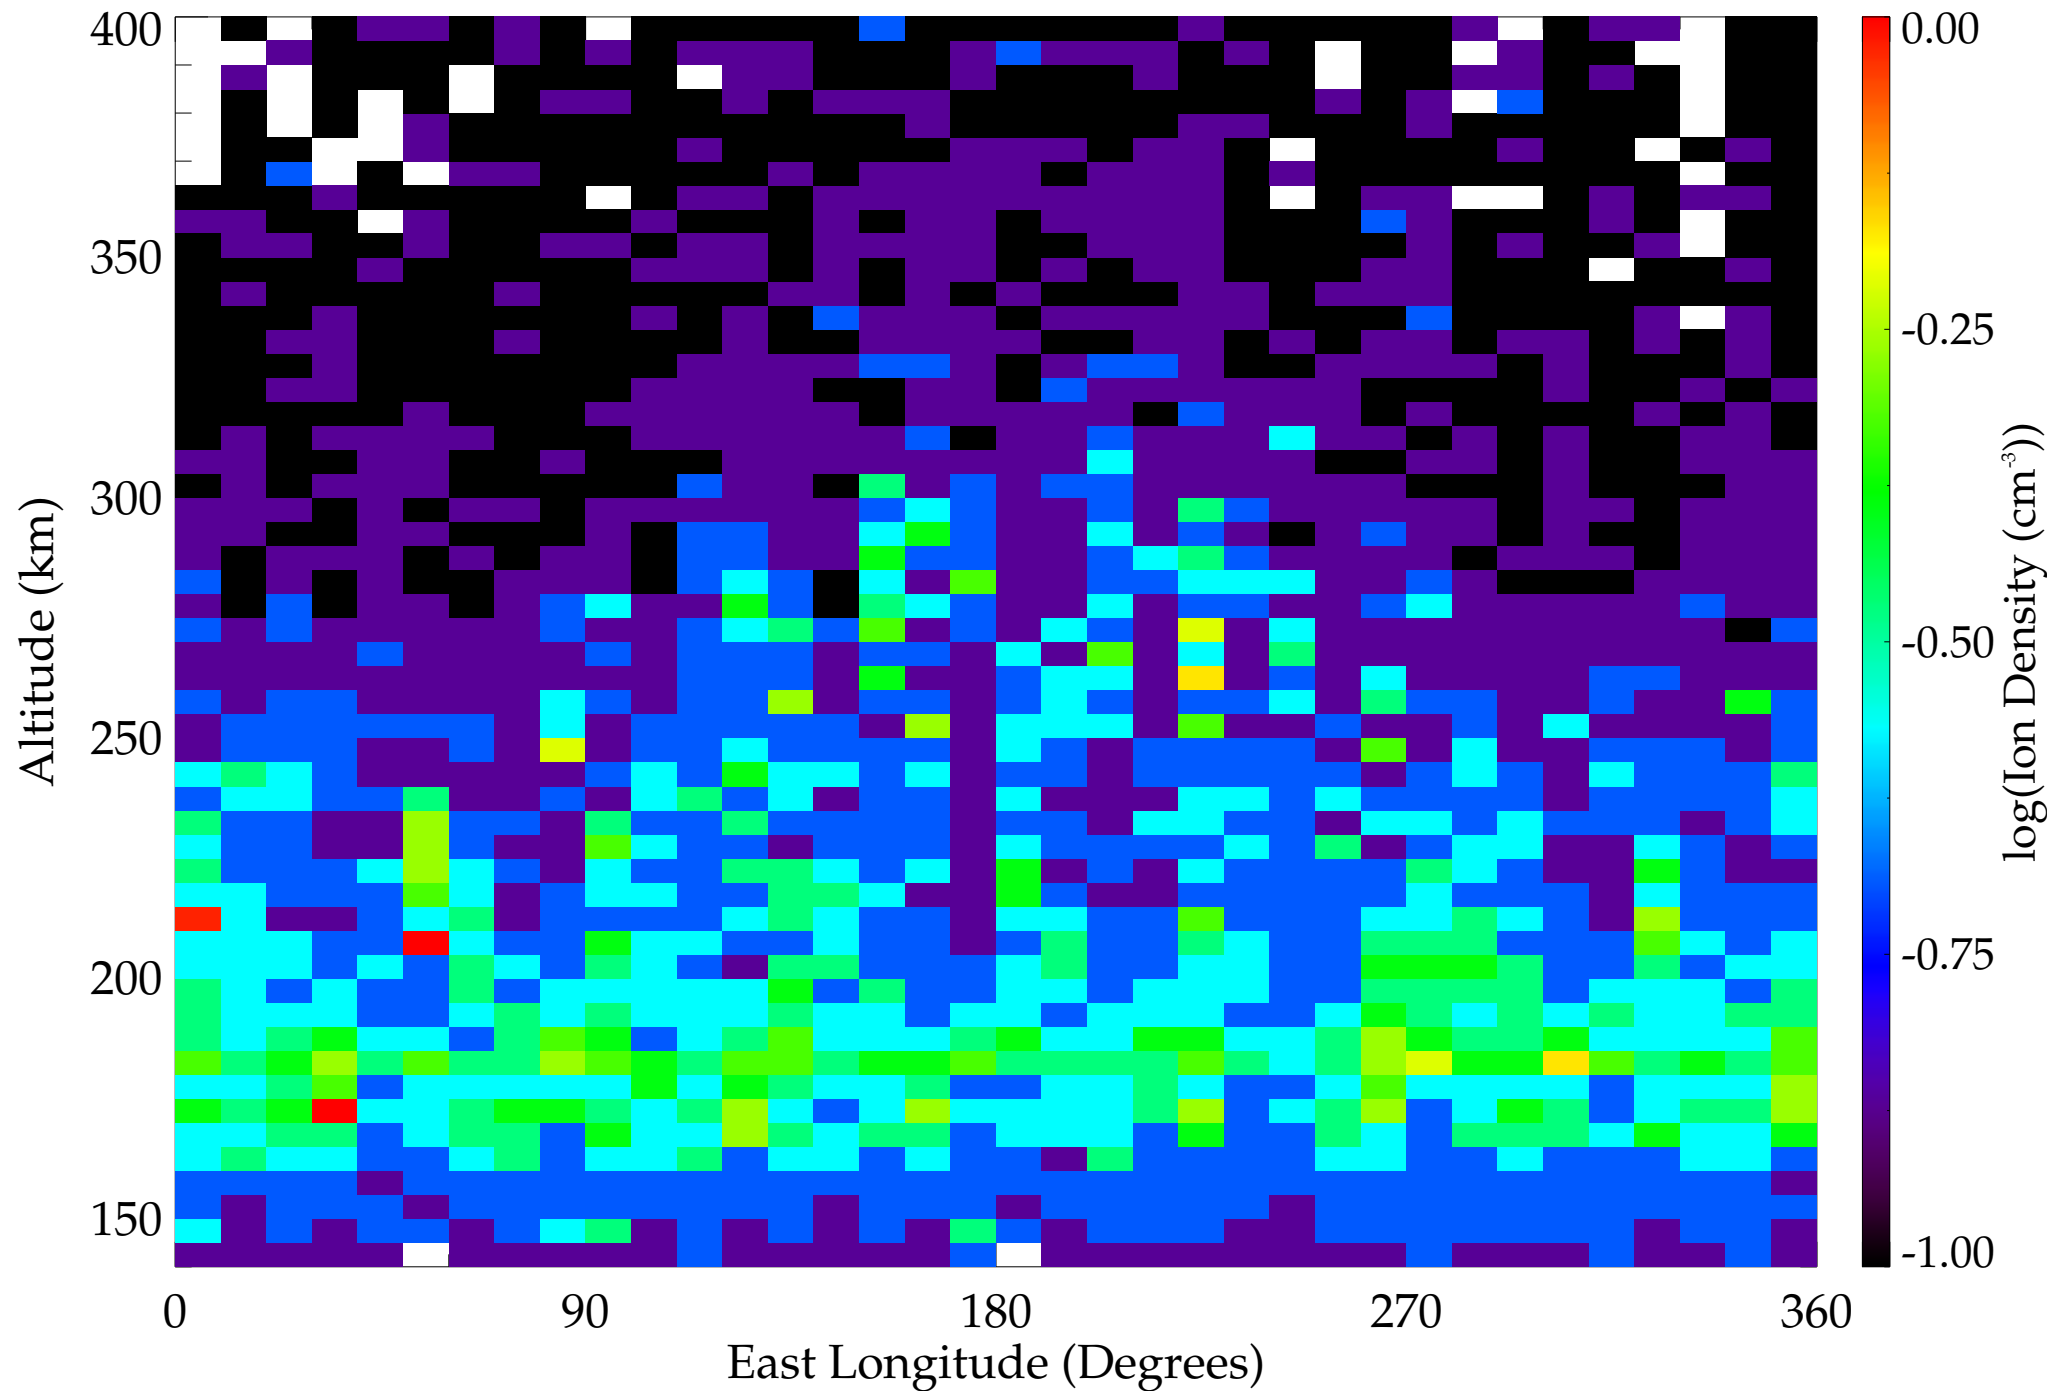



# Mass Number: 23

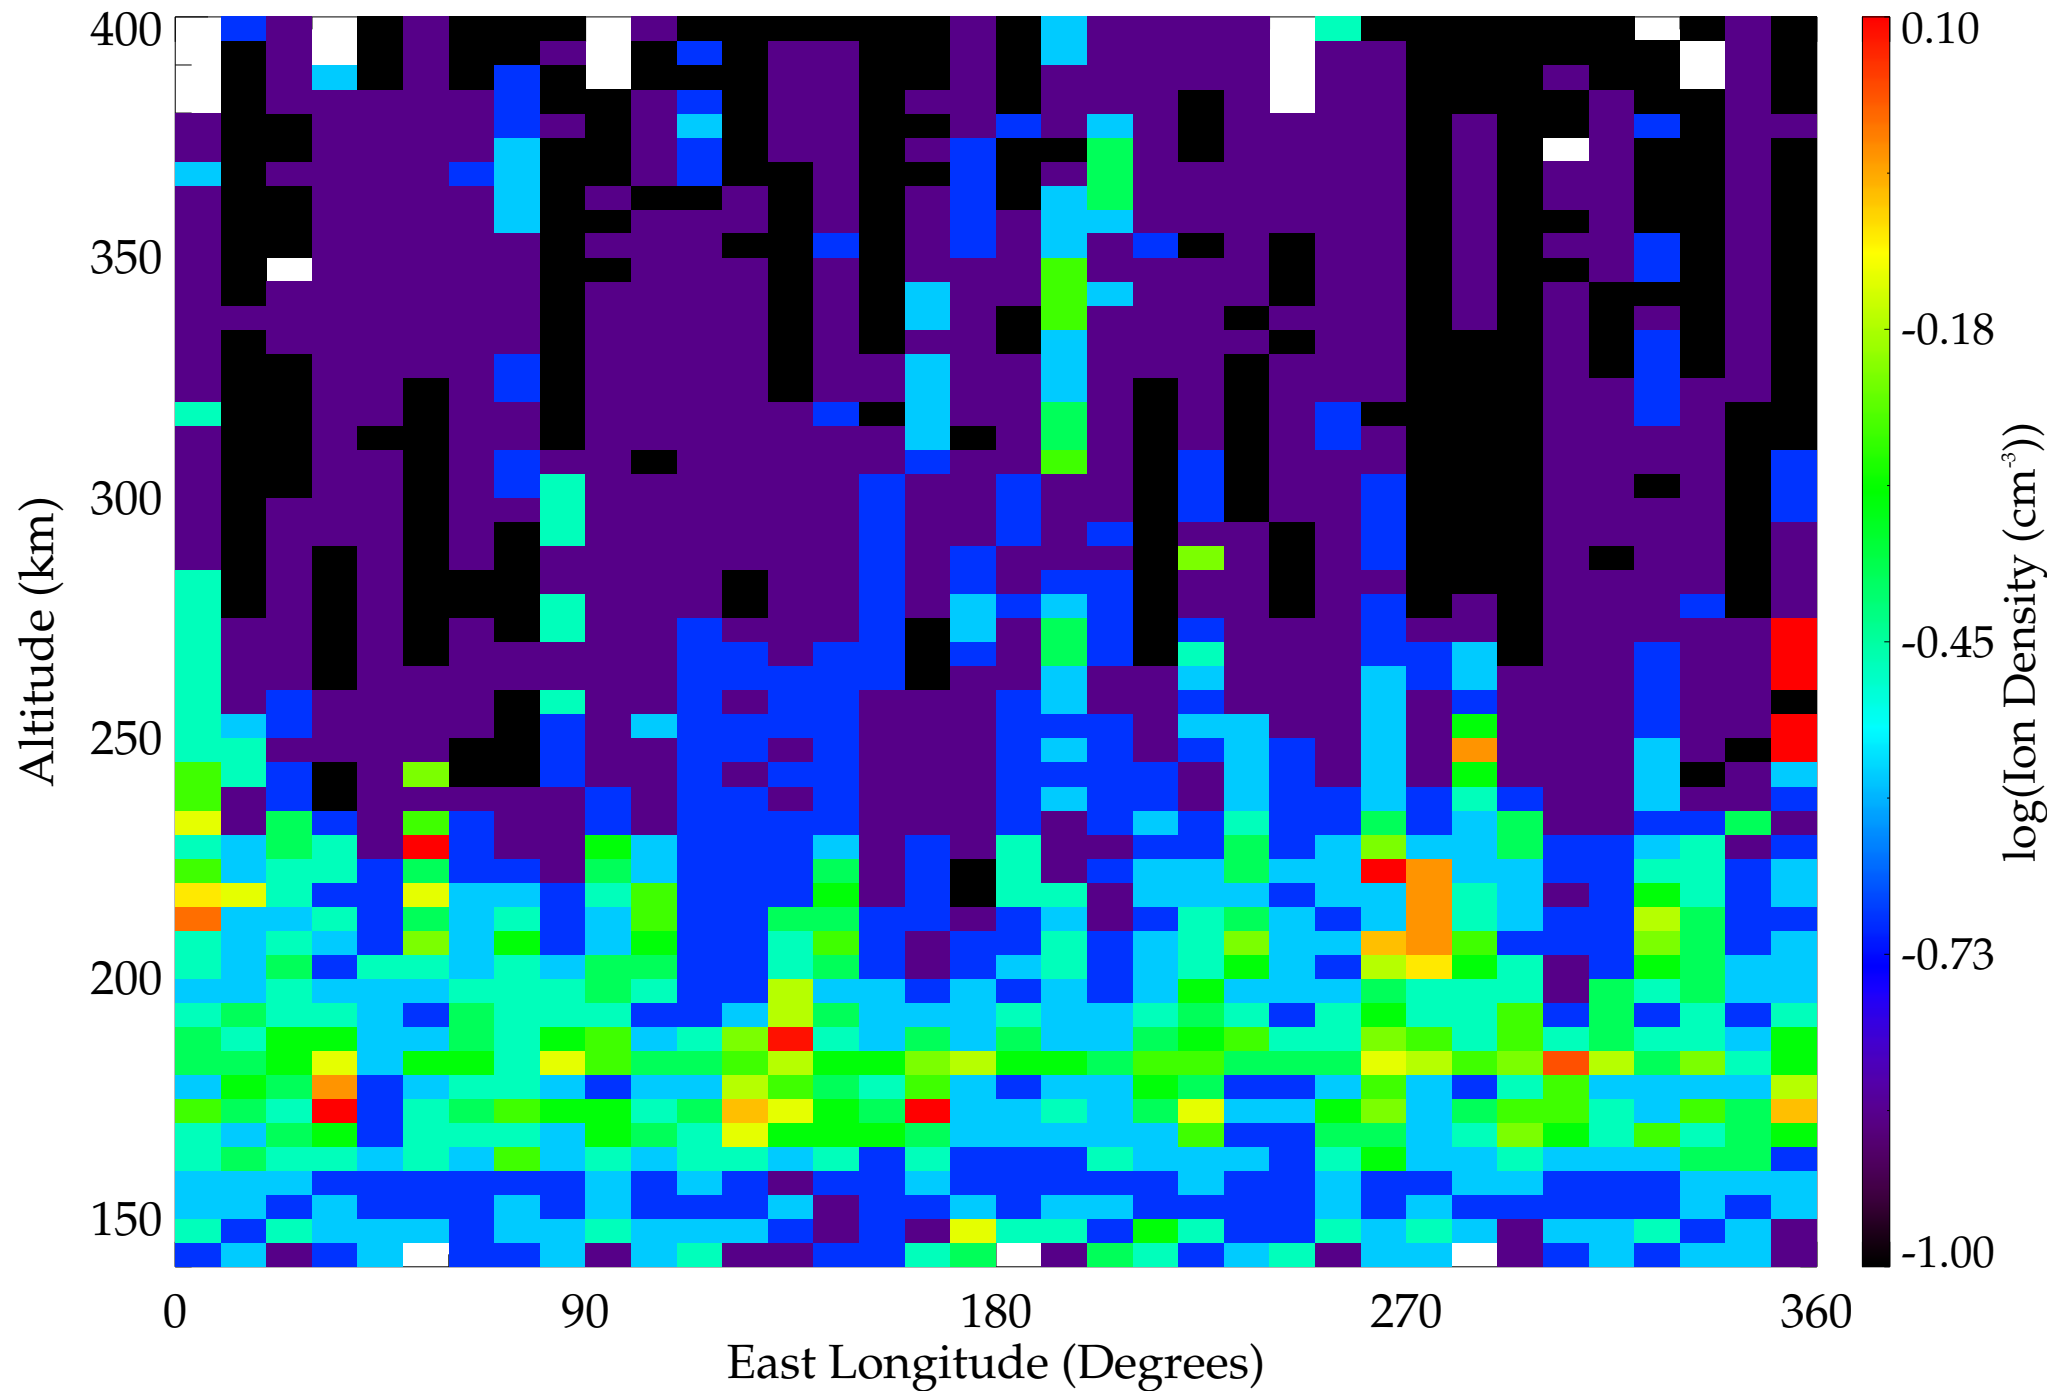

# Mass Number: 24

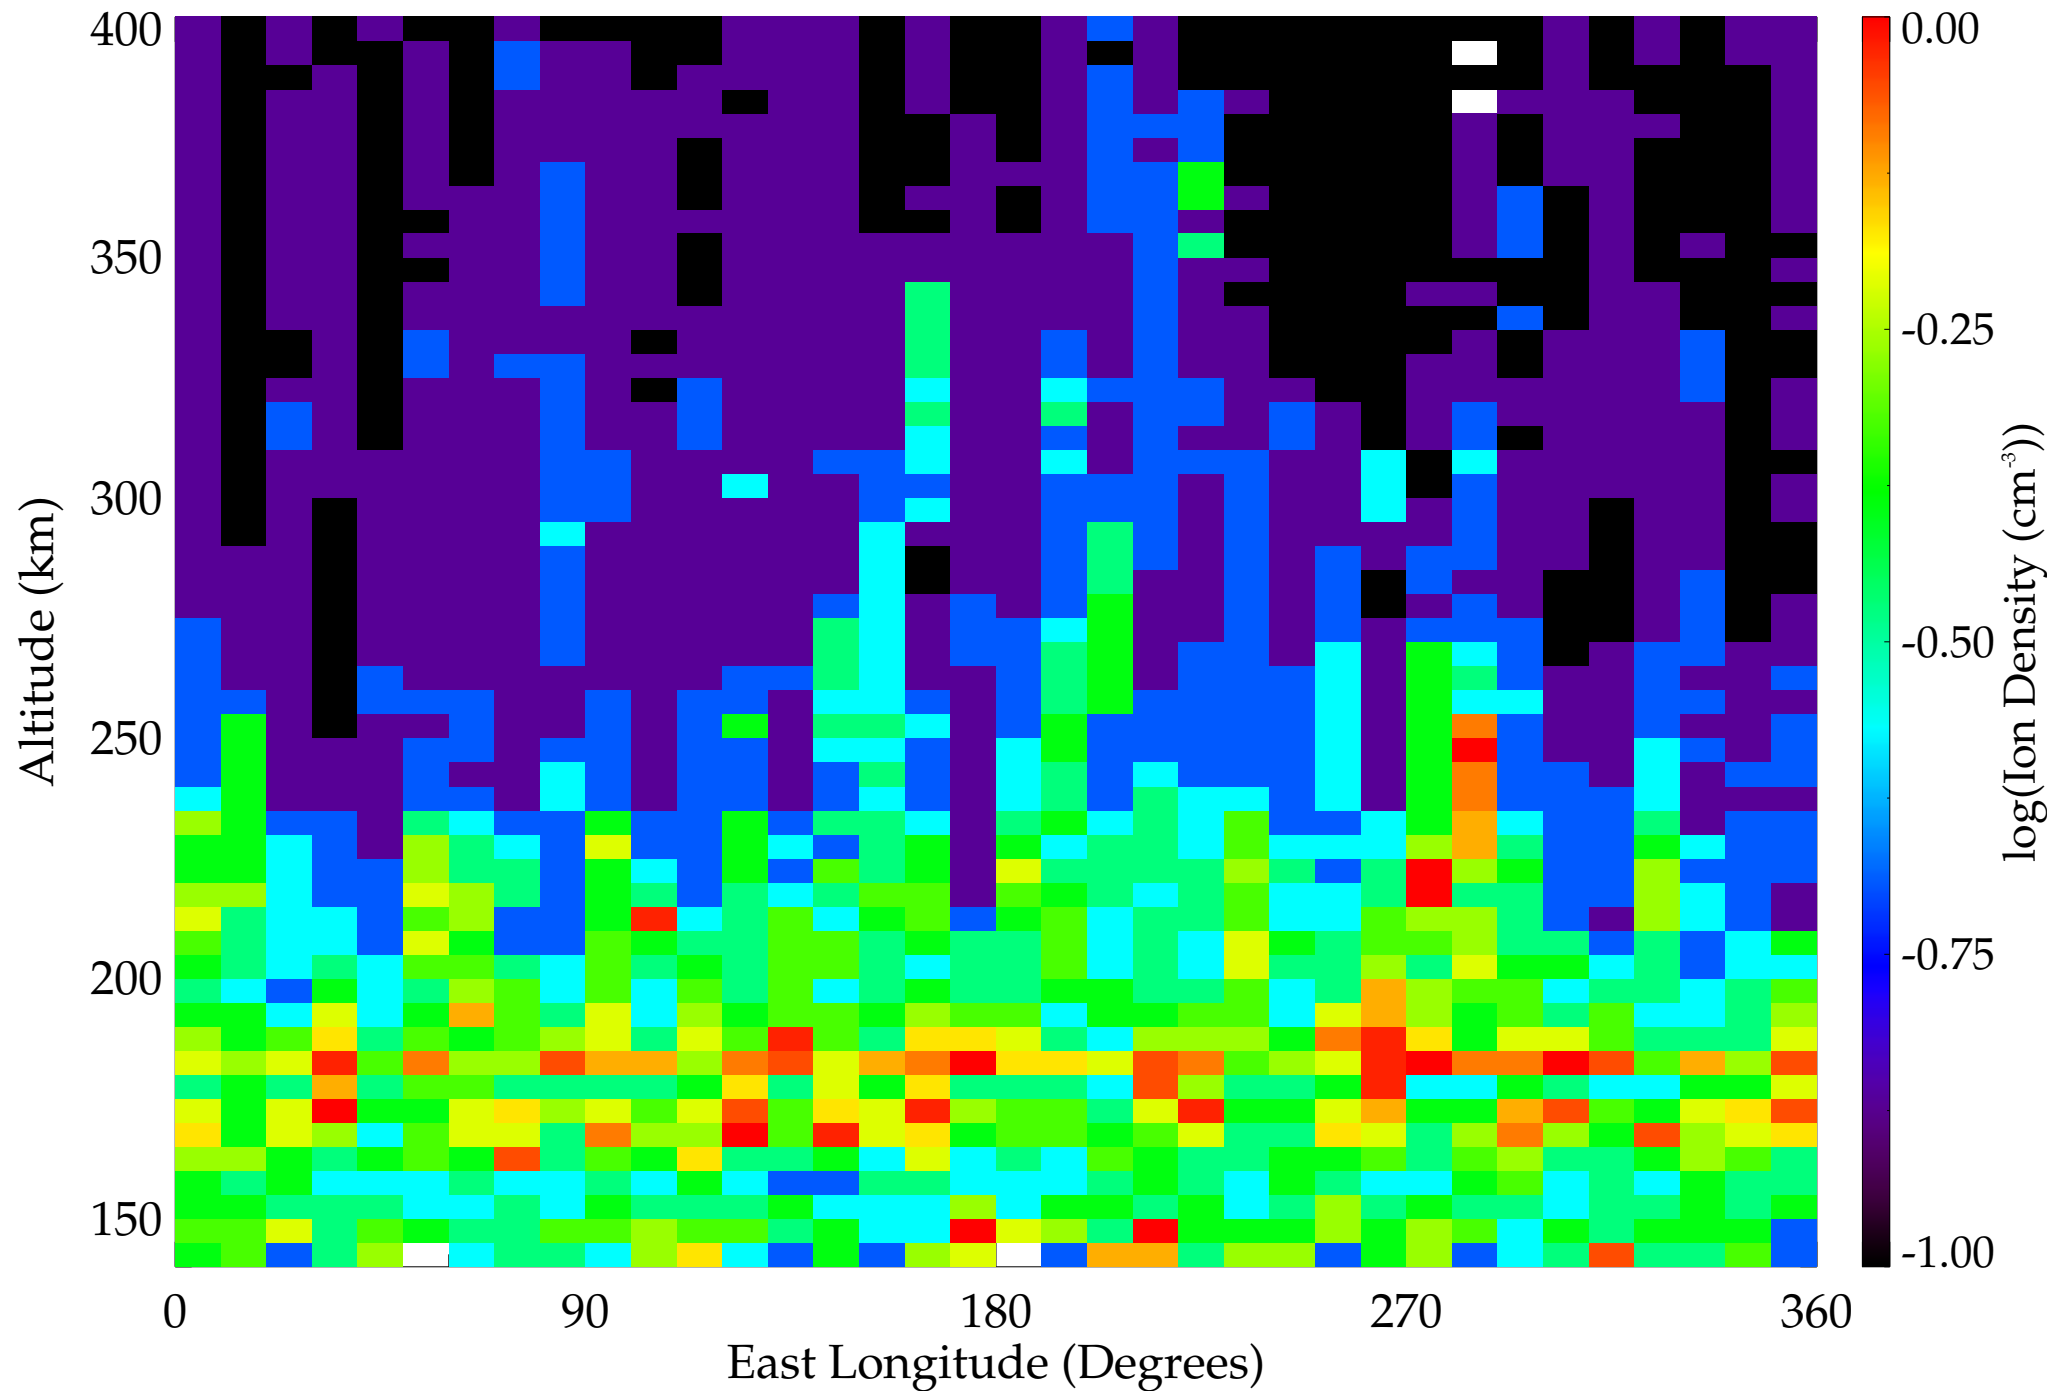

# Mass Number: 25

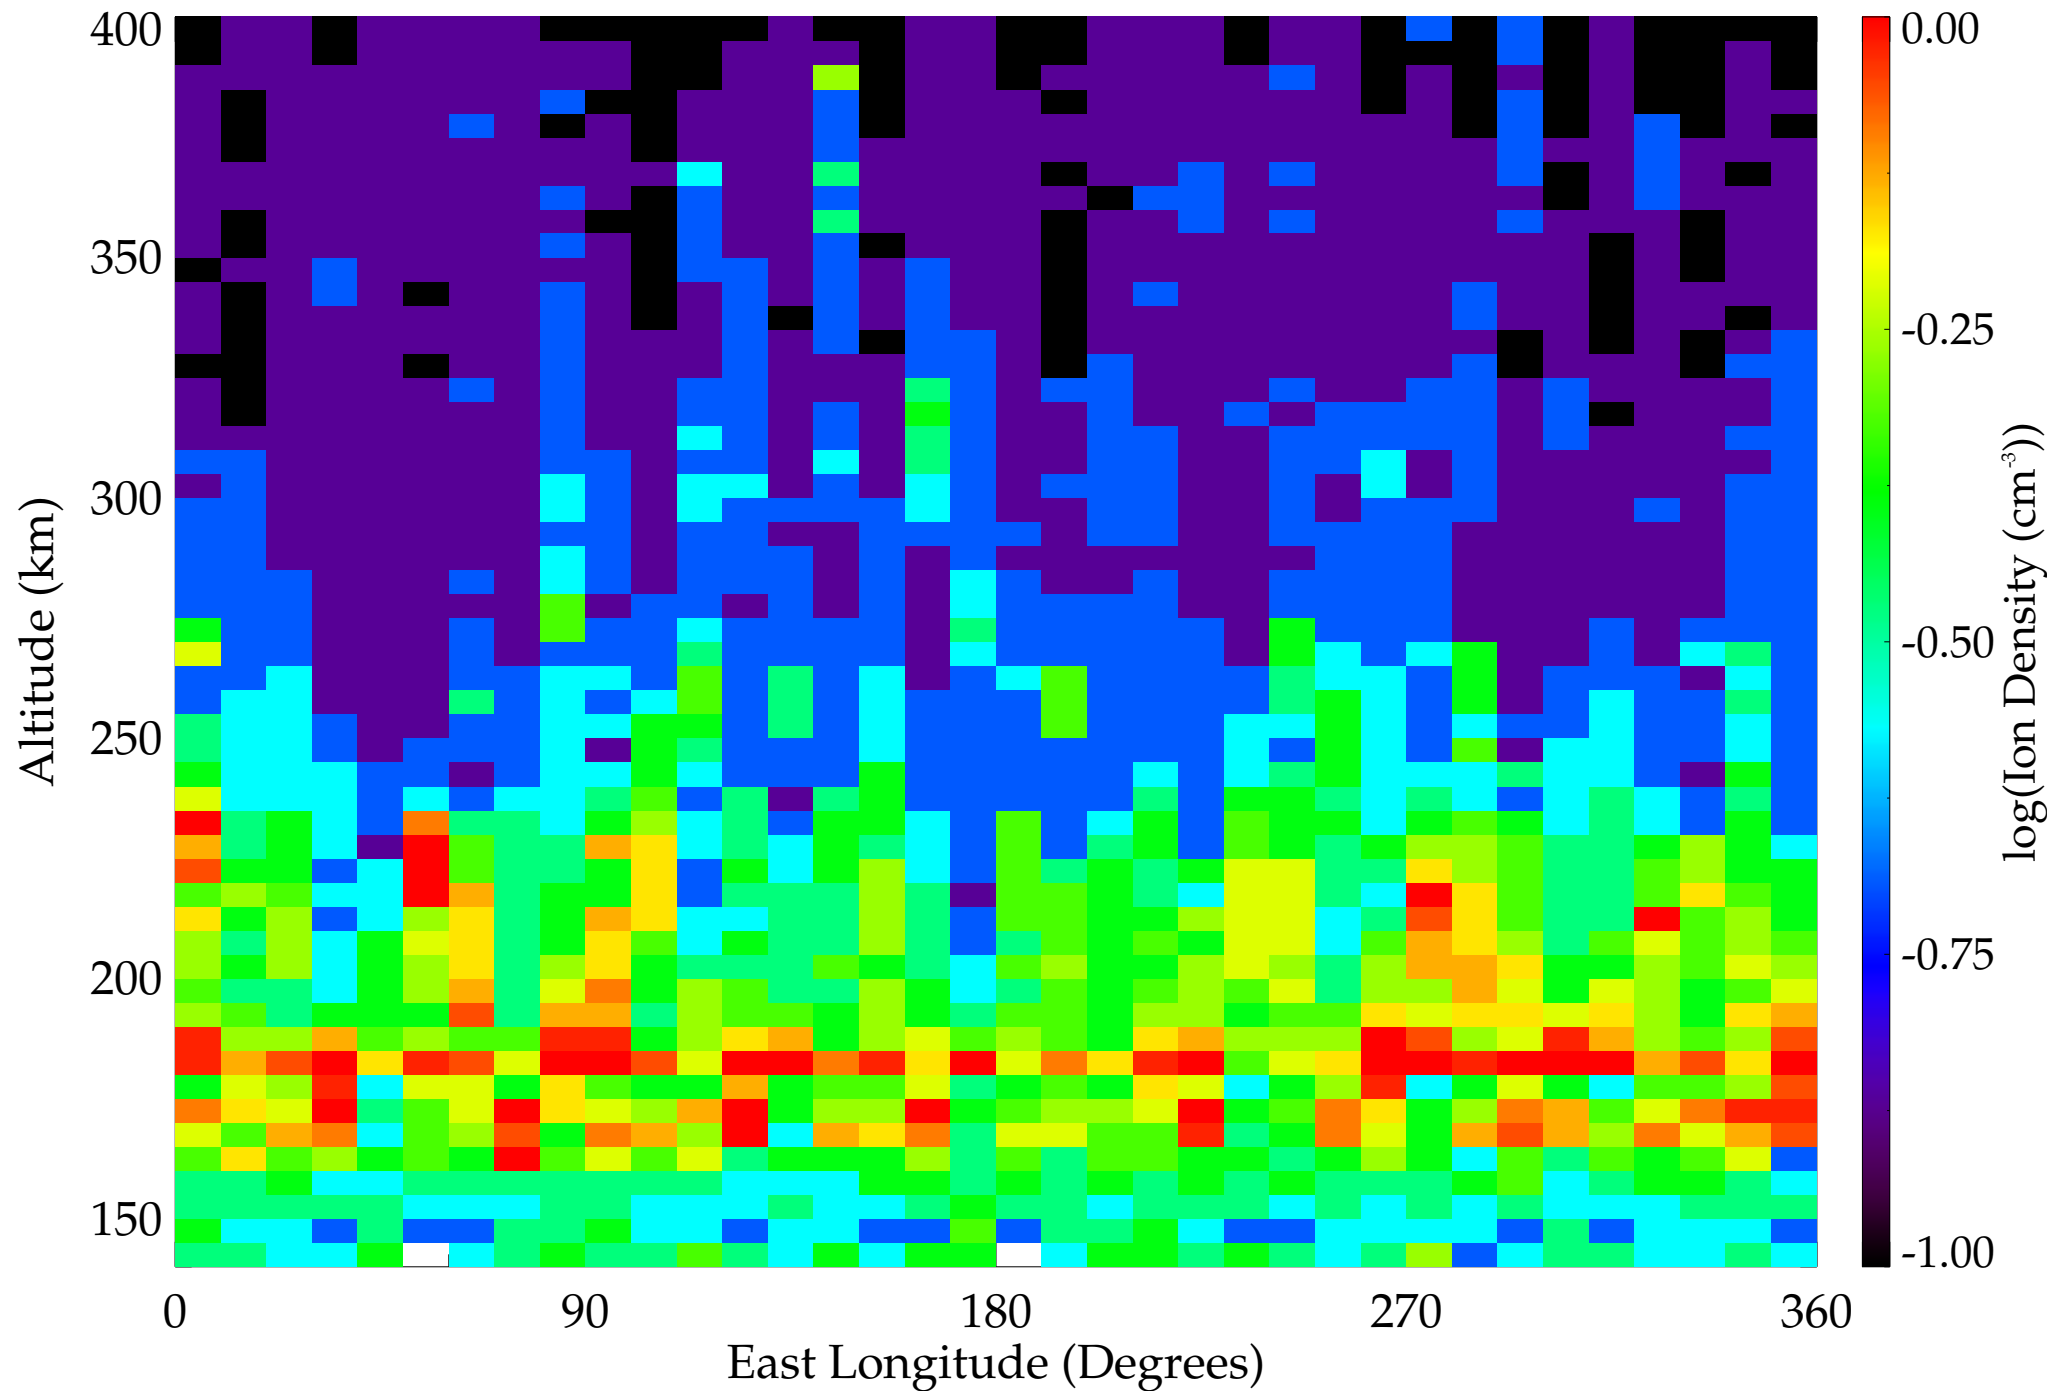

# Mass Number: 26

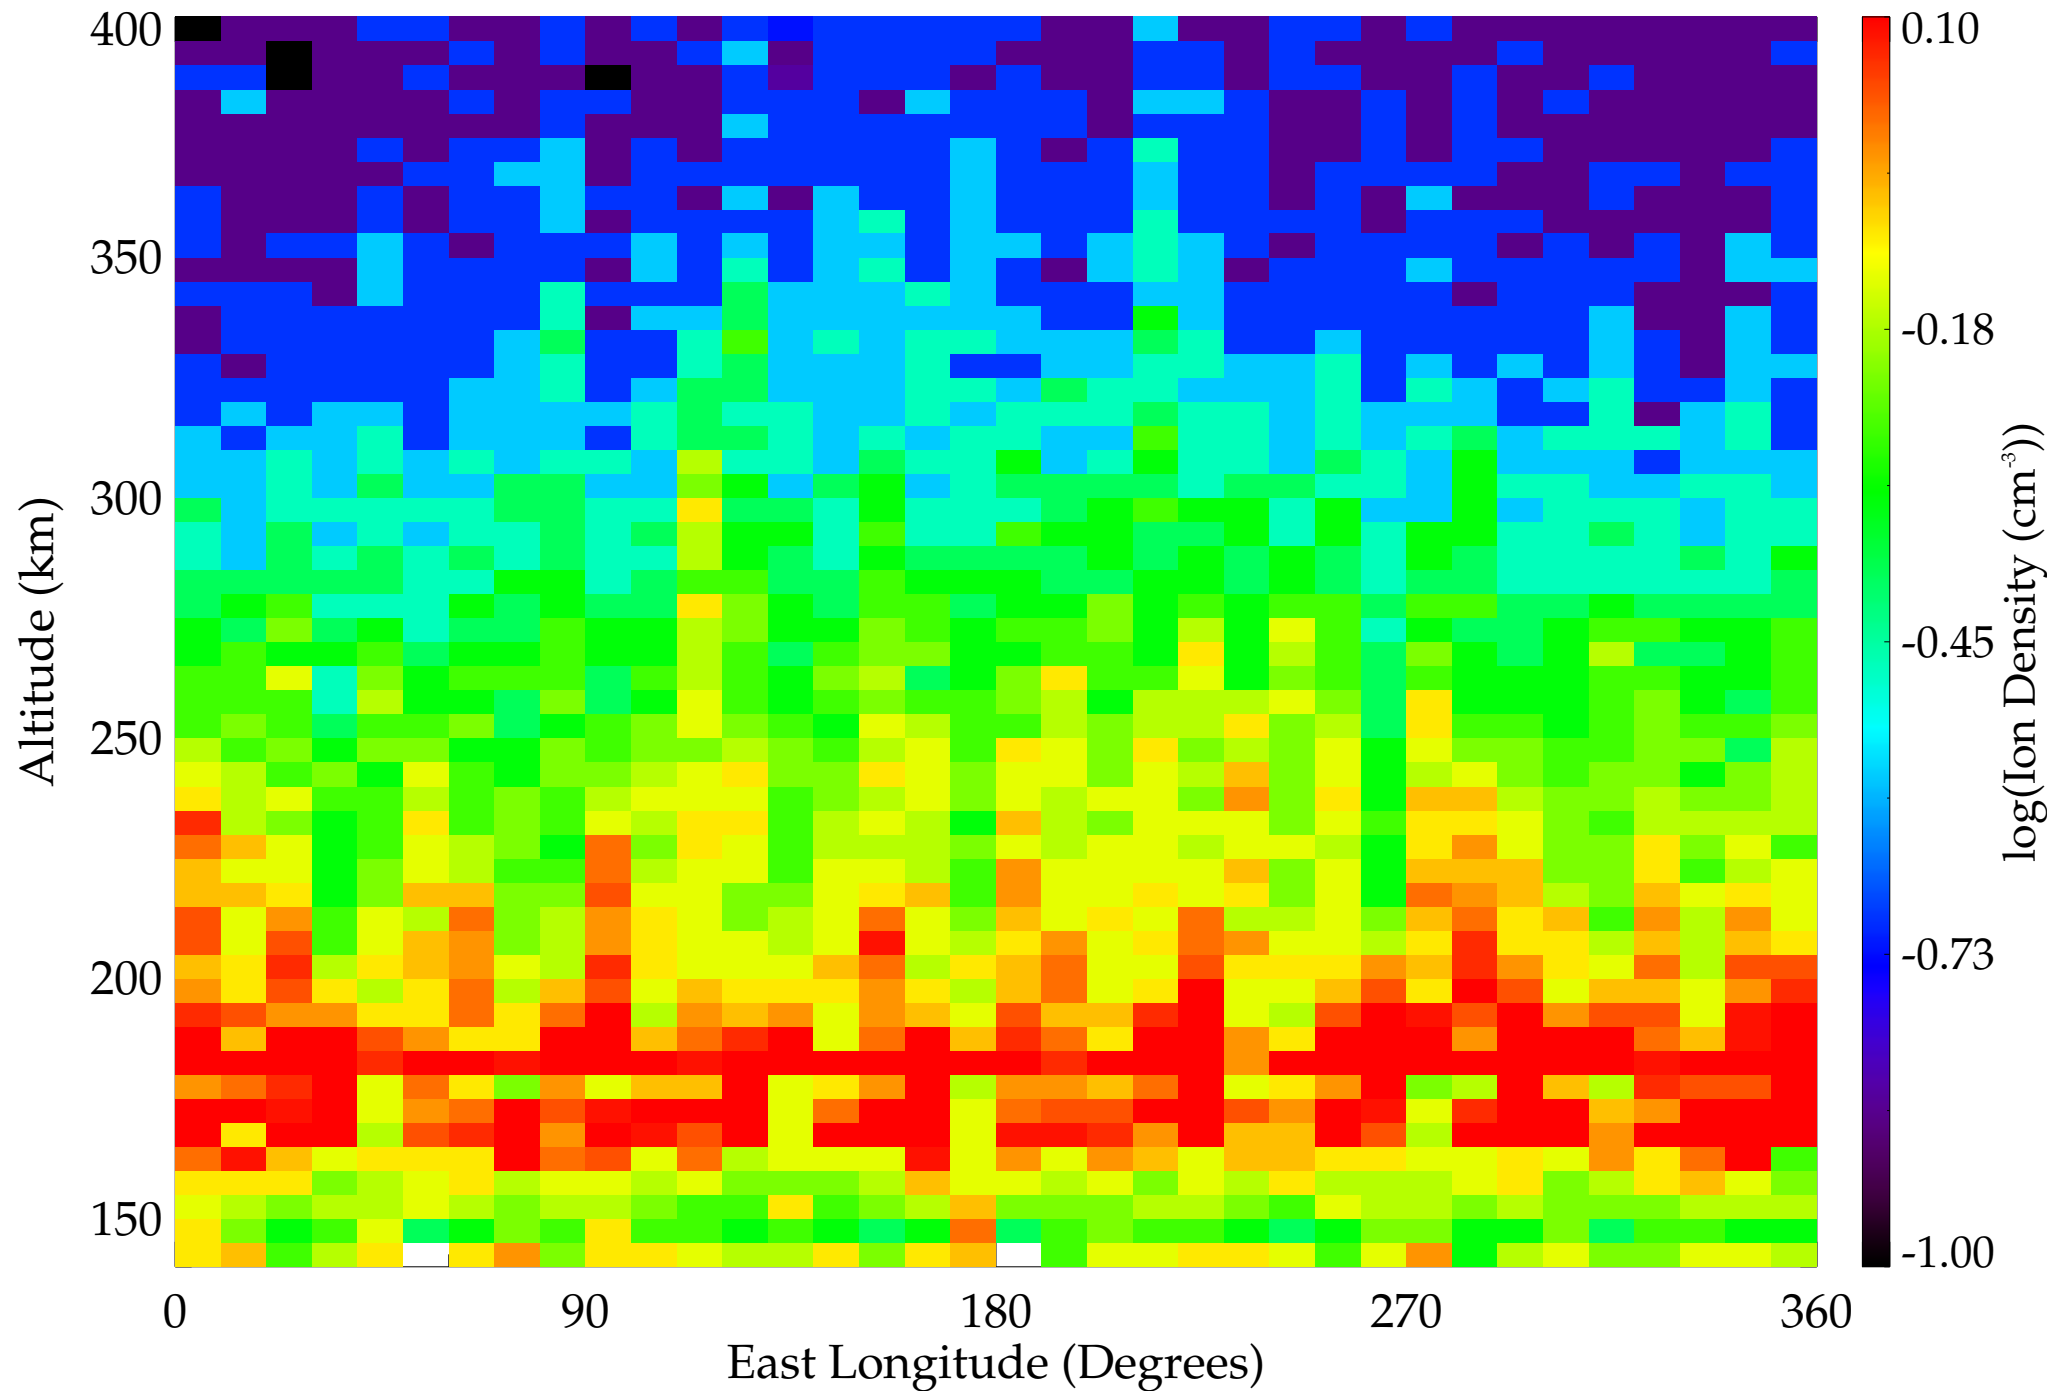

# Mass Number: 27

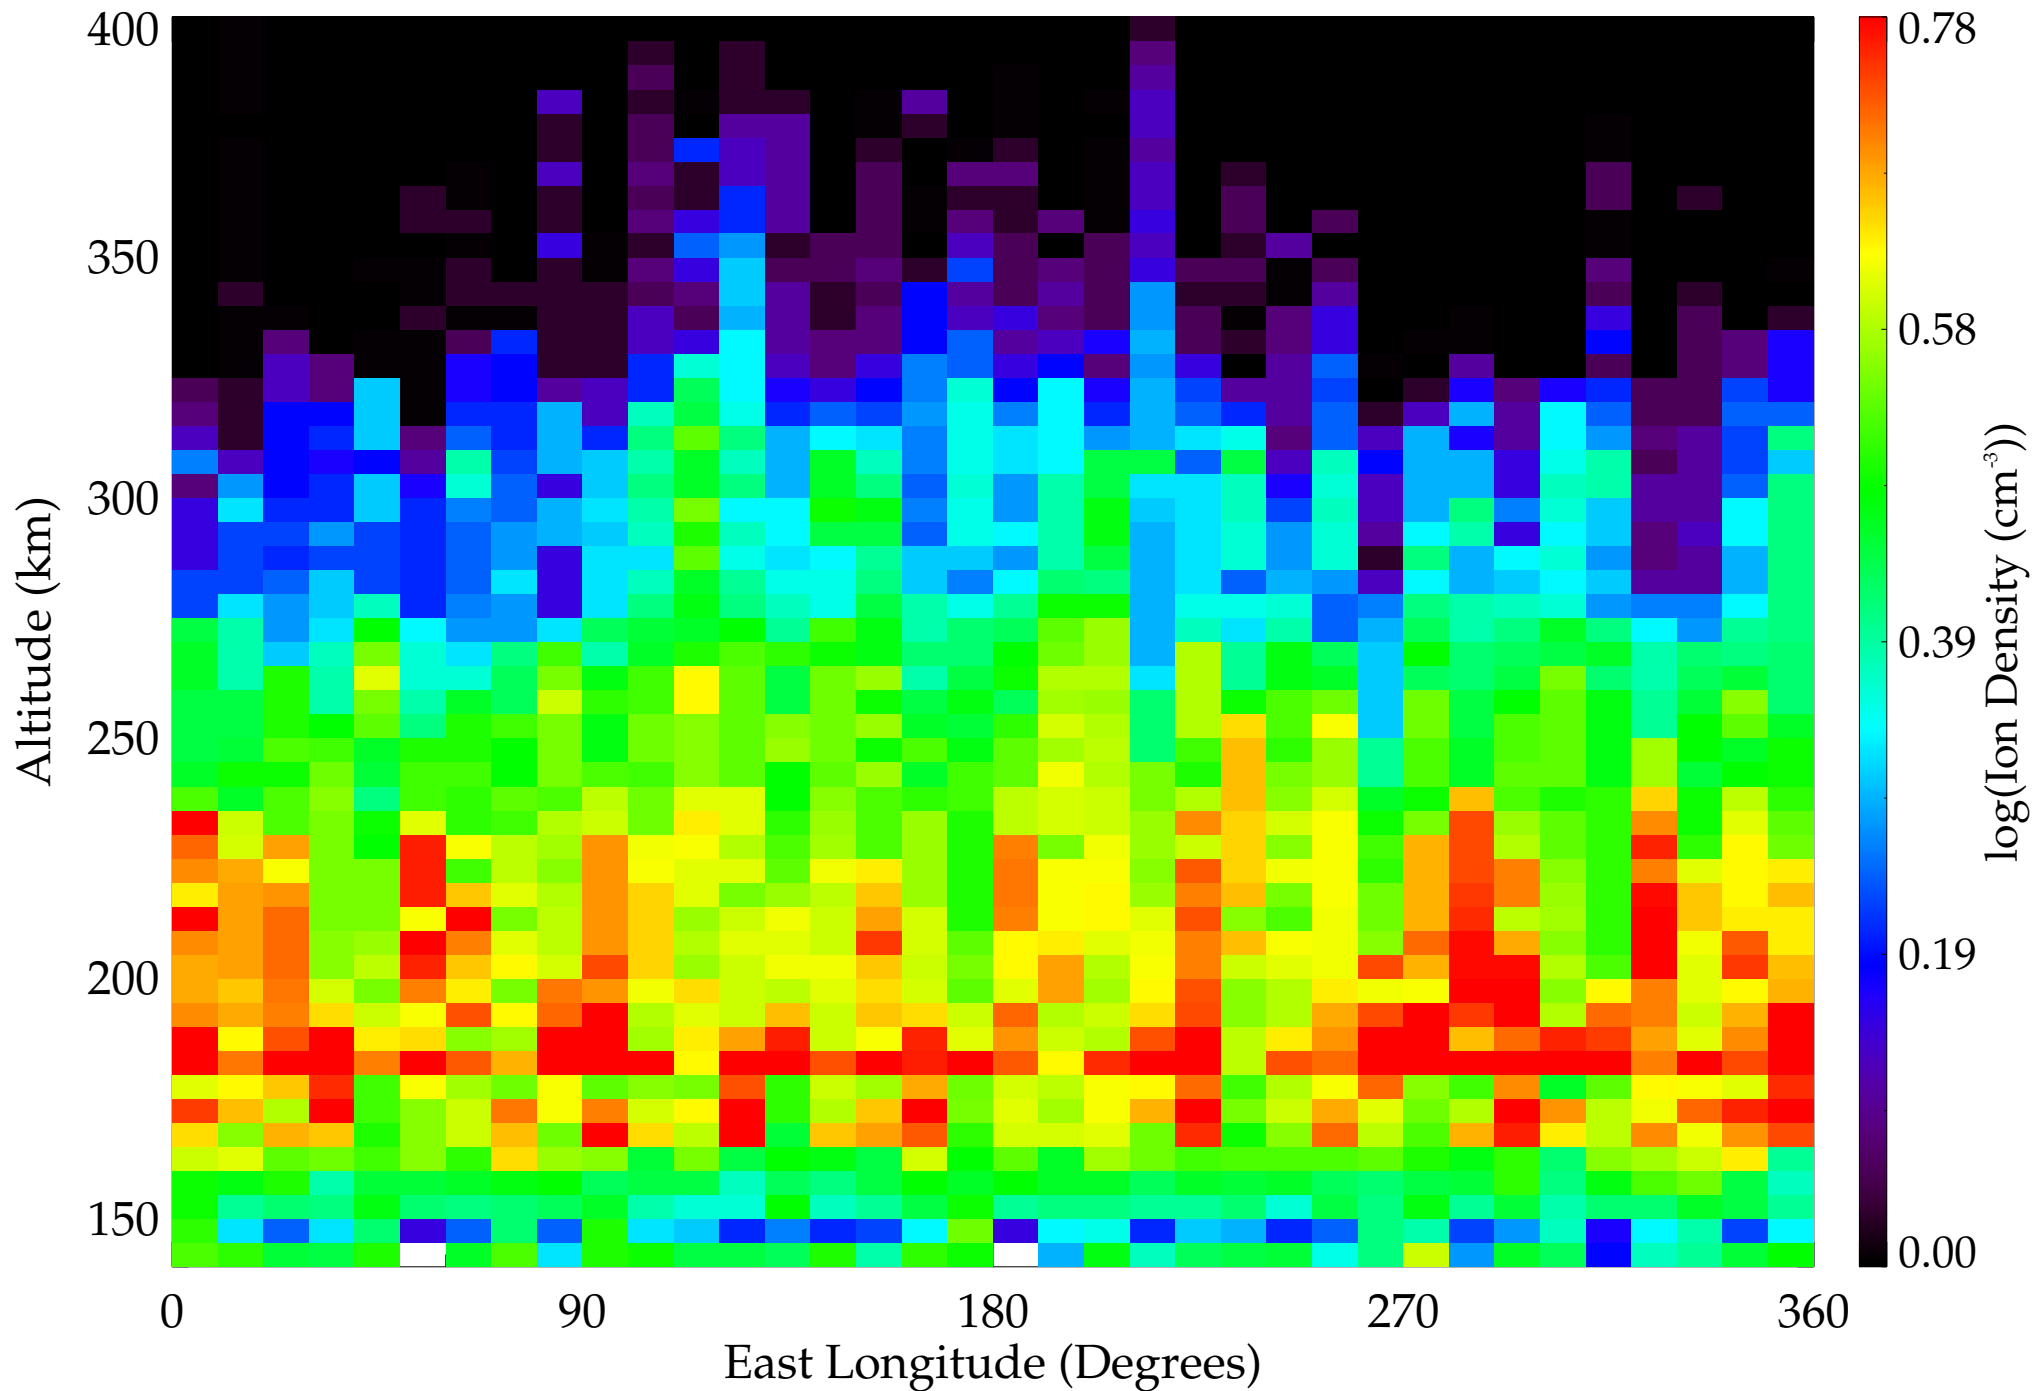

# Mass Number: 28

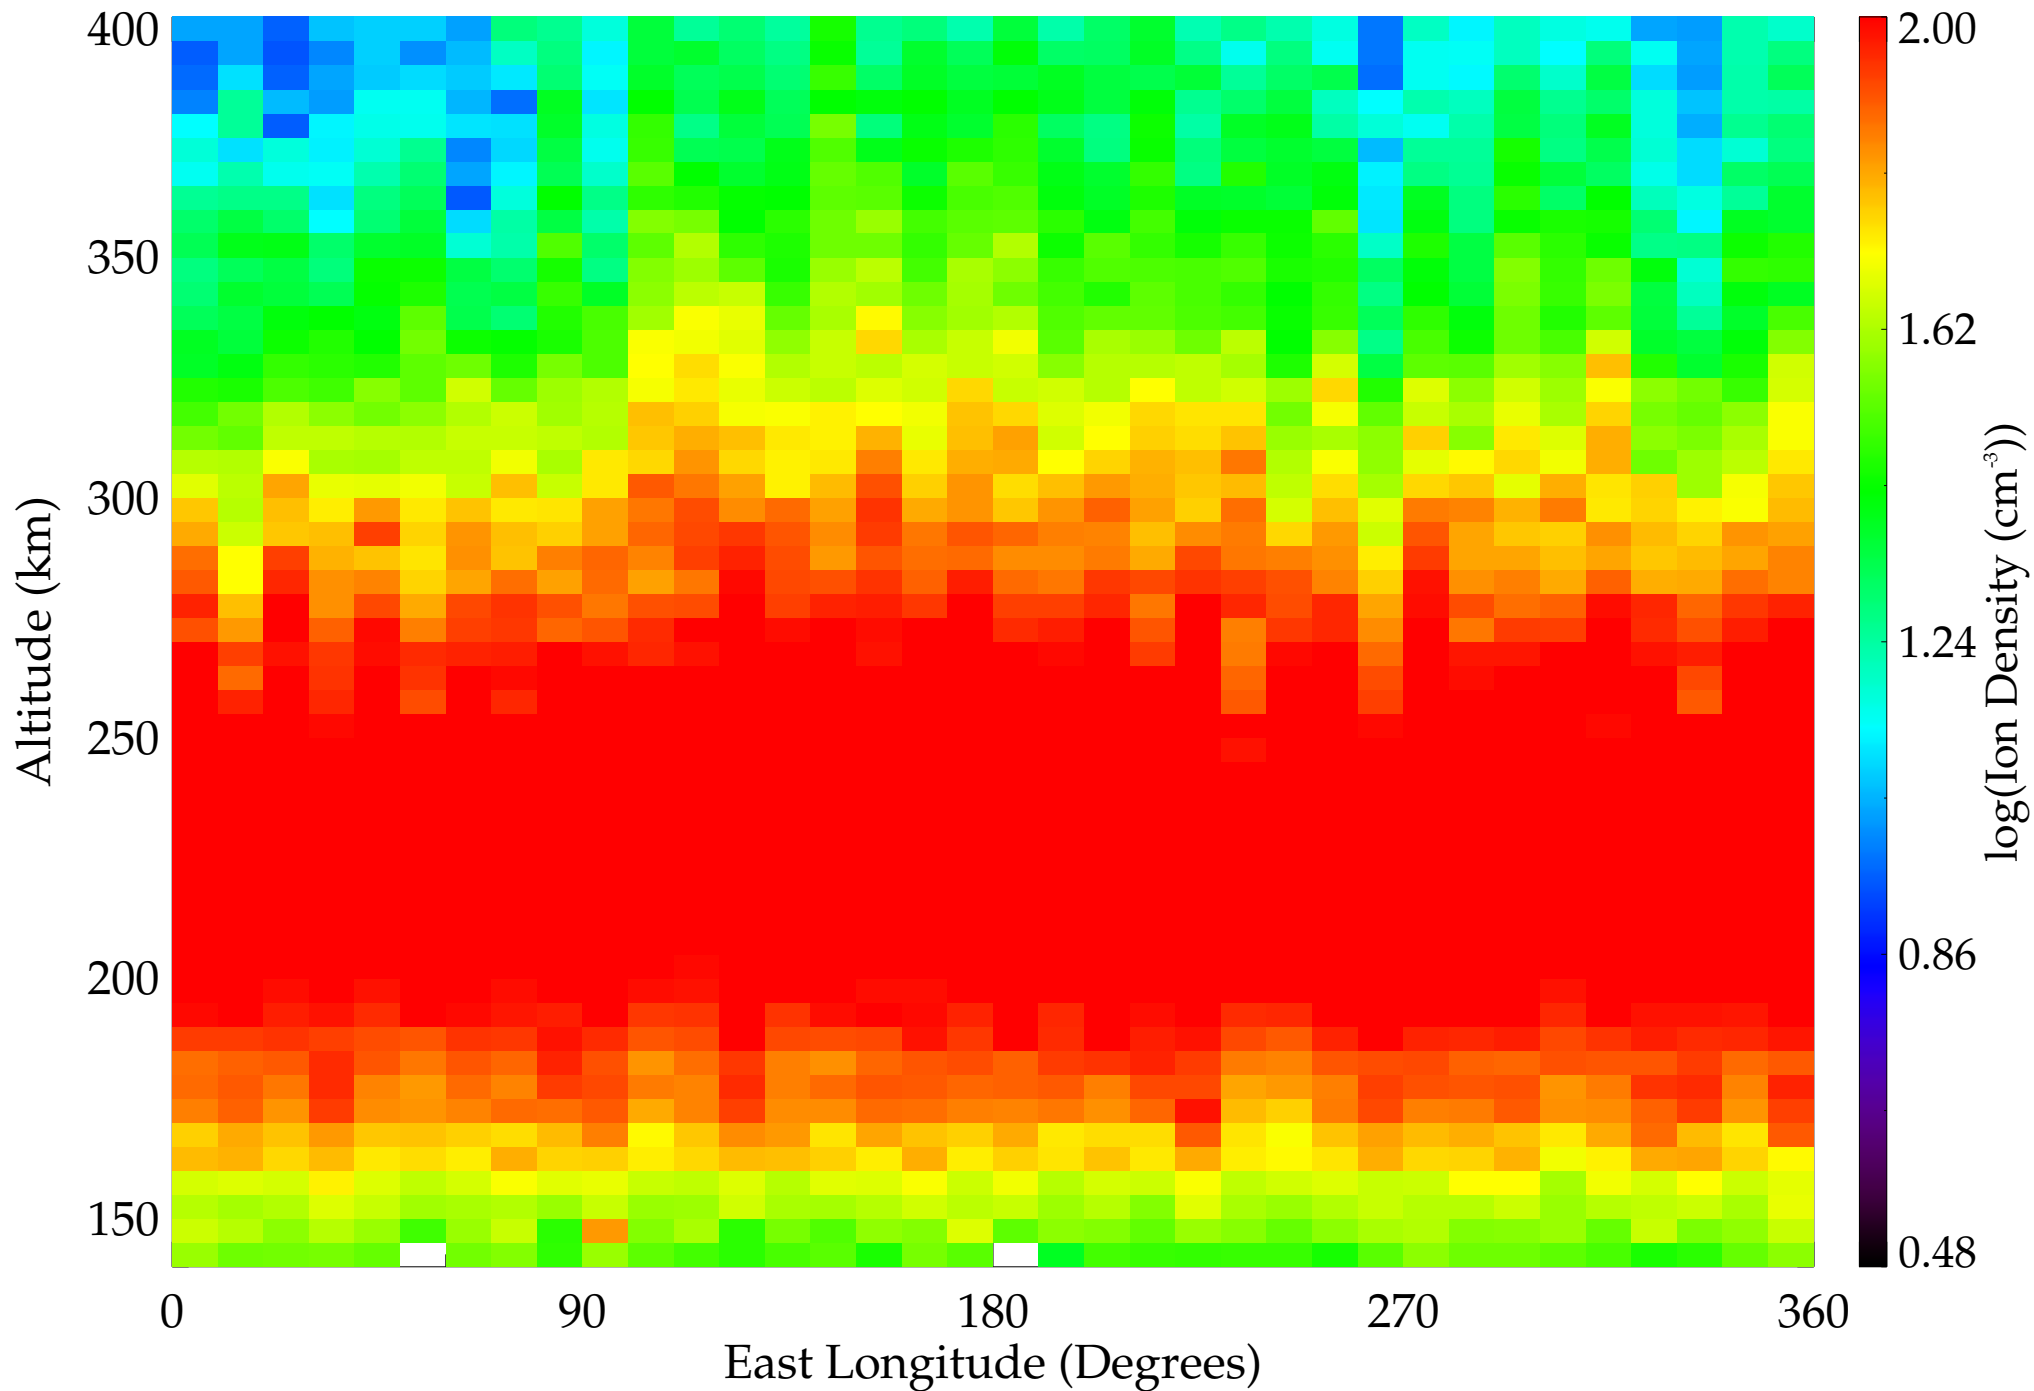

# Mass Number: 29

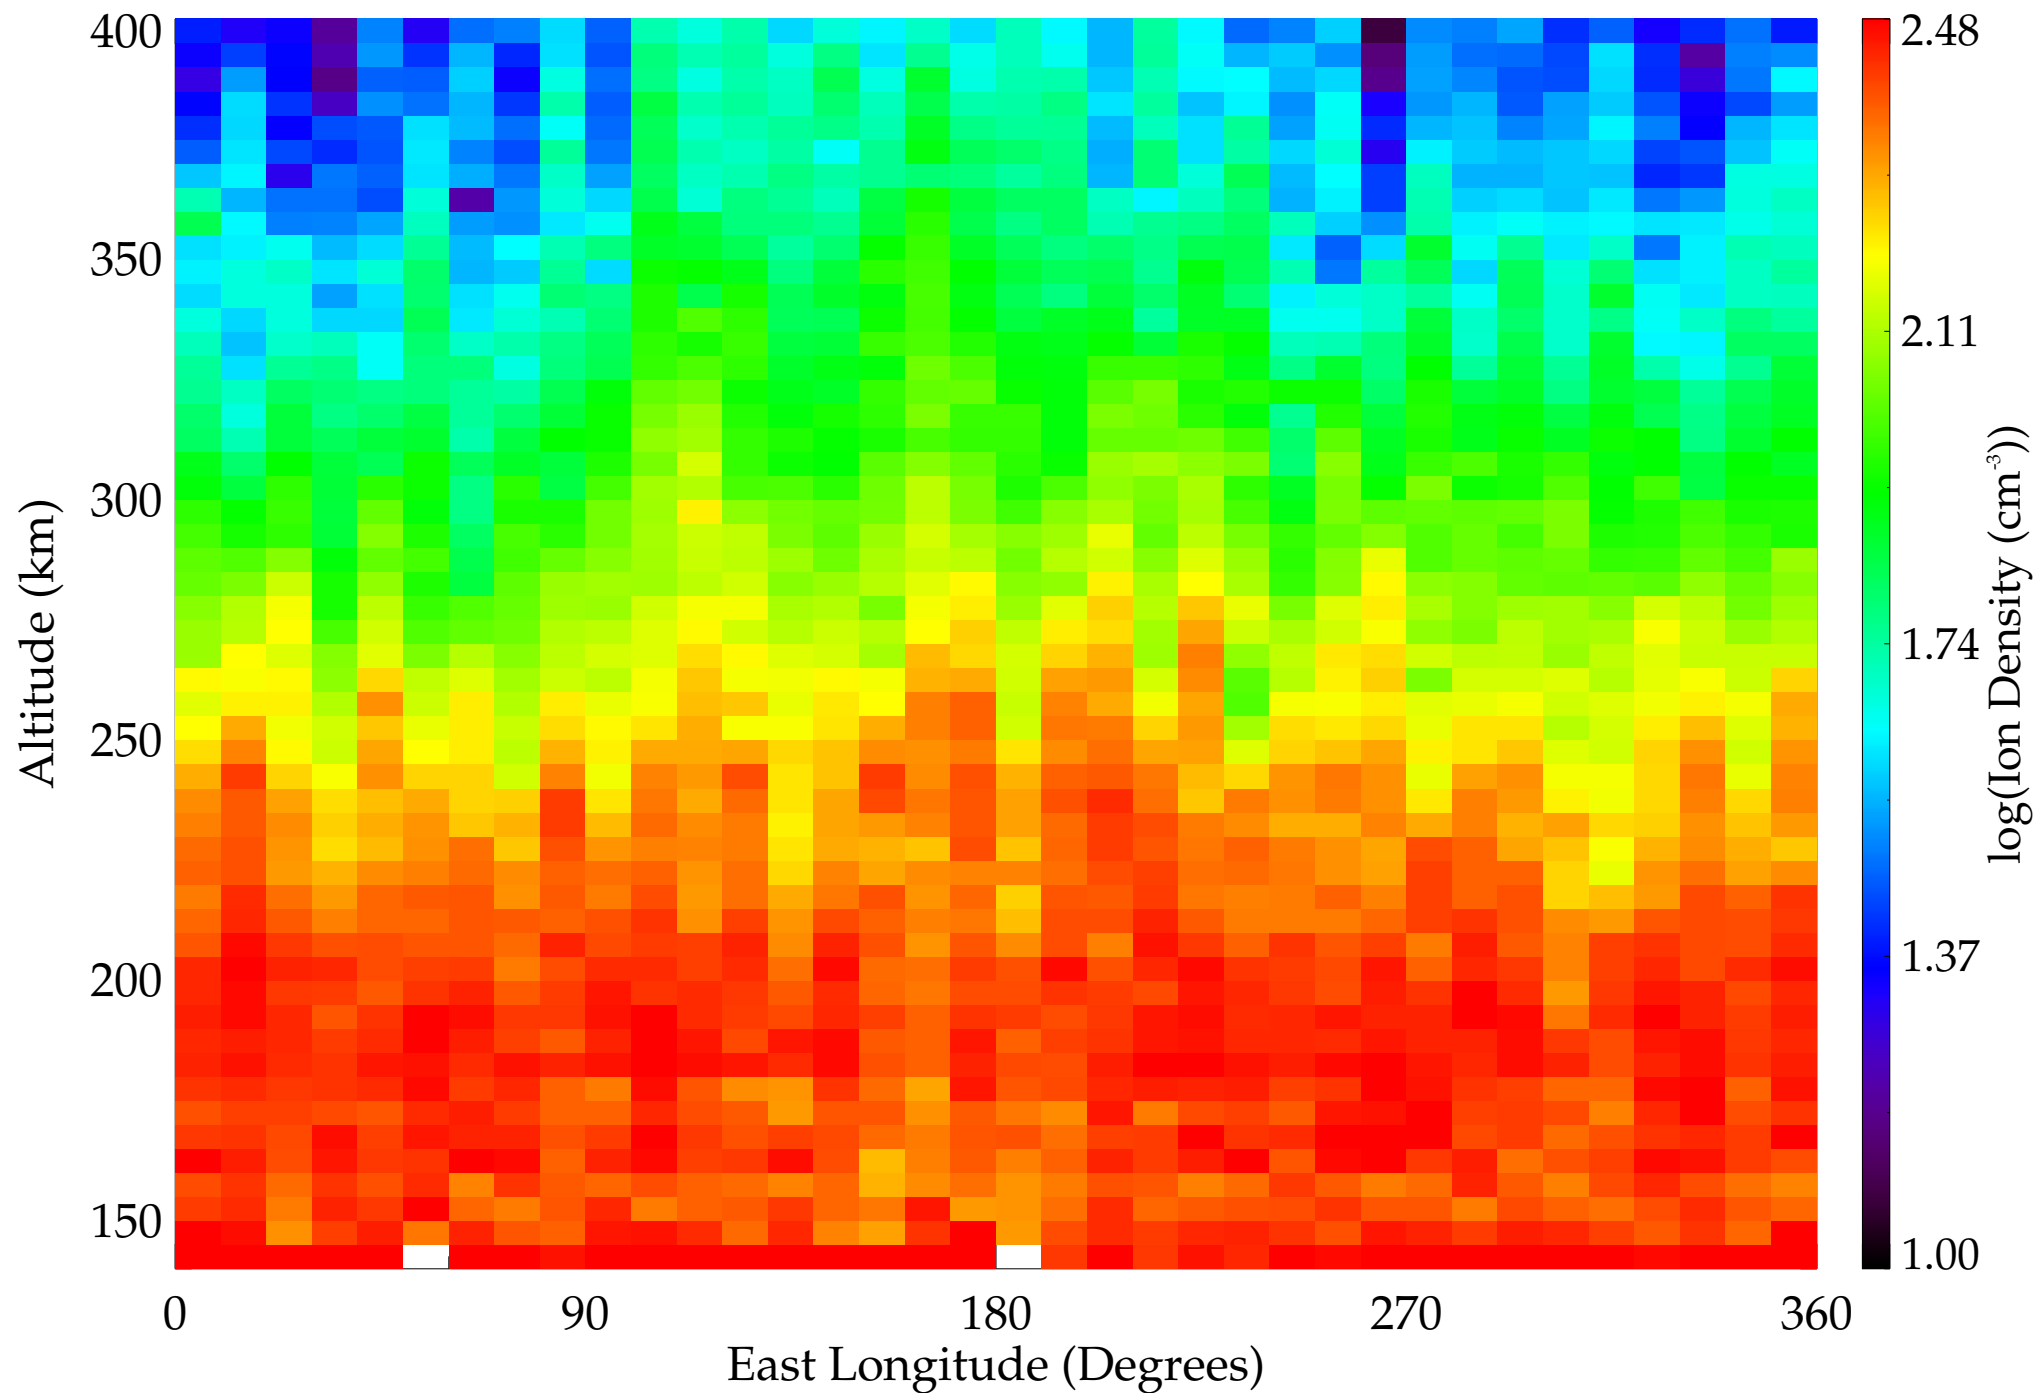

# Mass Number: 30

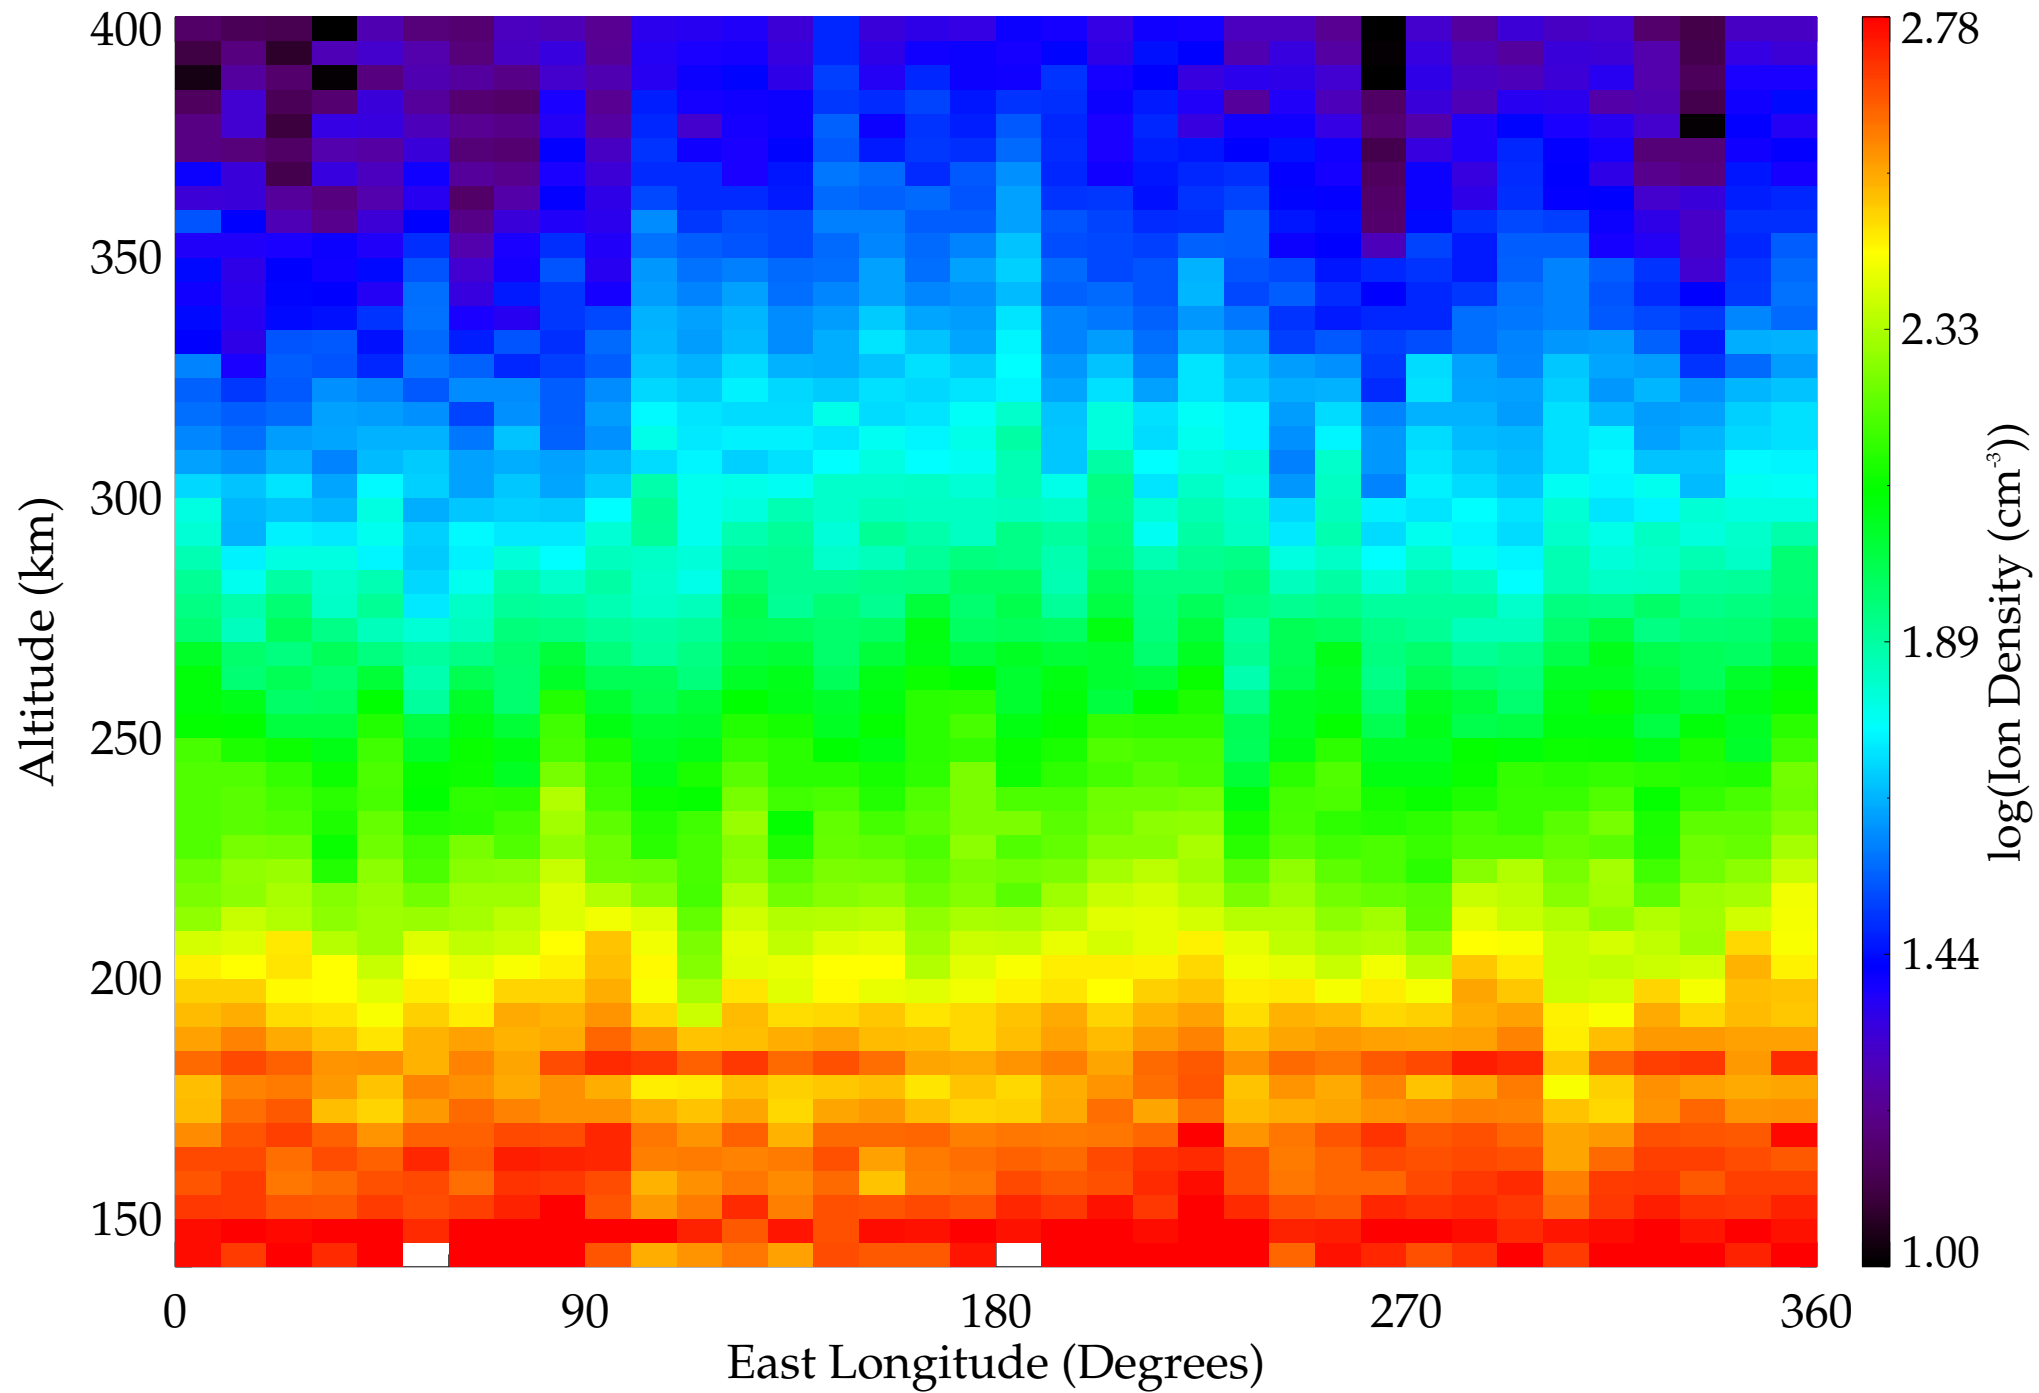



# Mass Number: 31

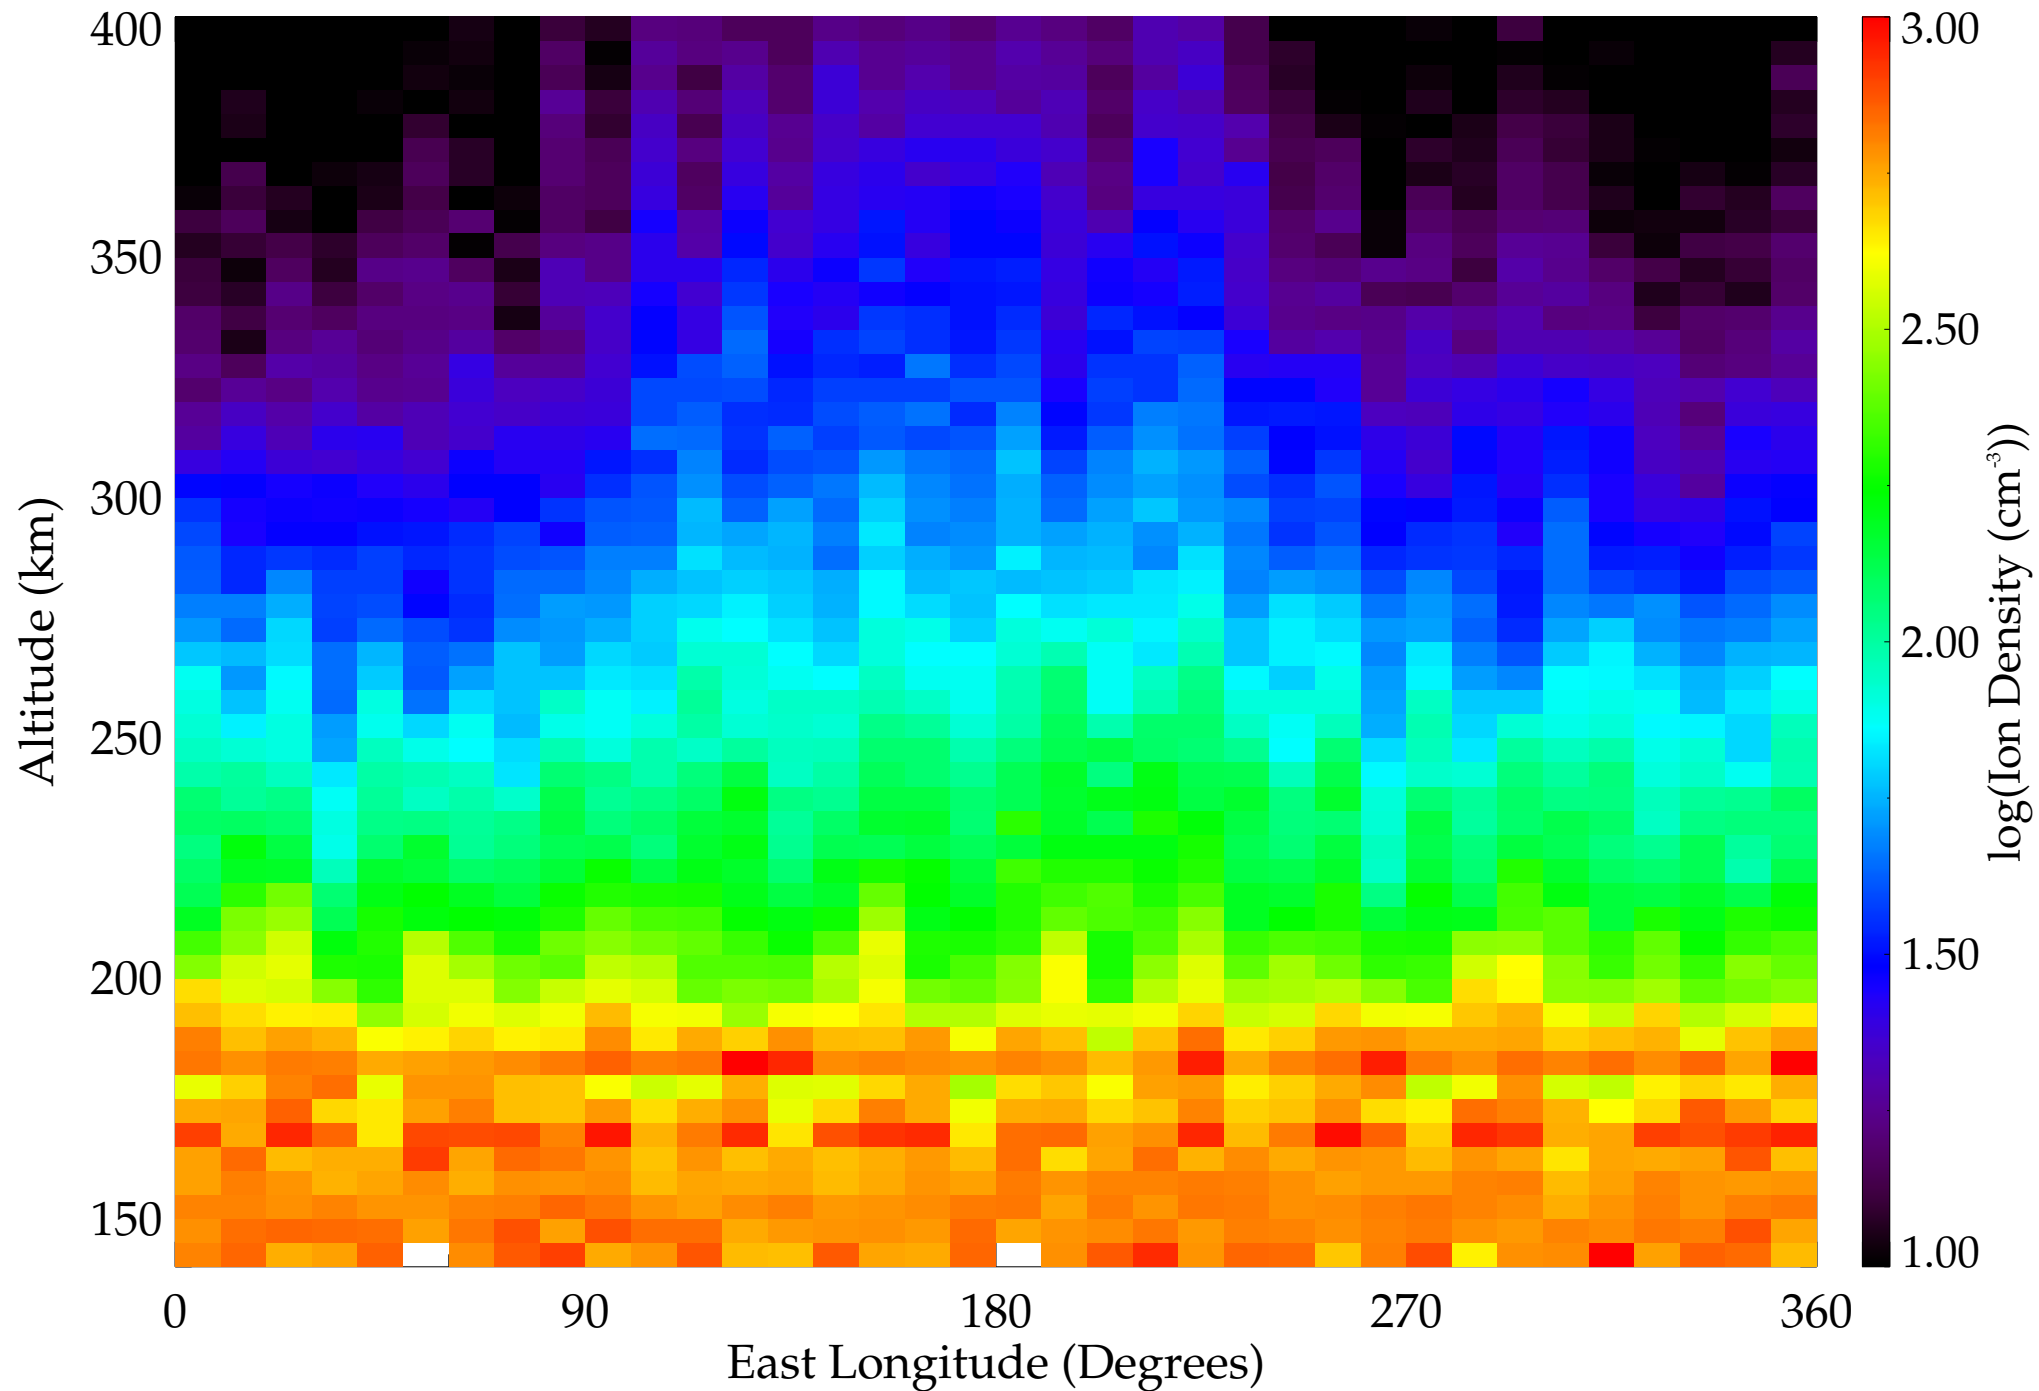

# Mass Number: 32

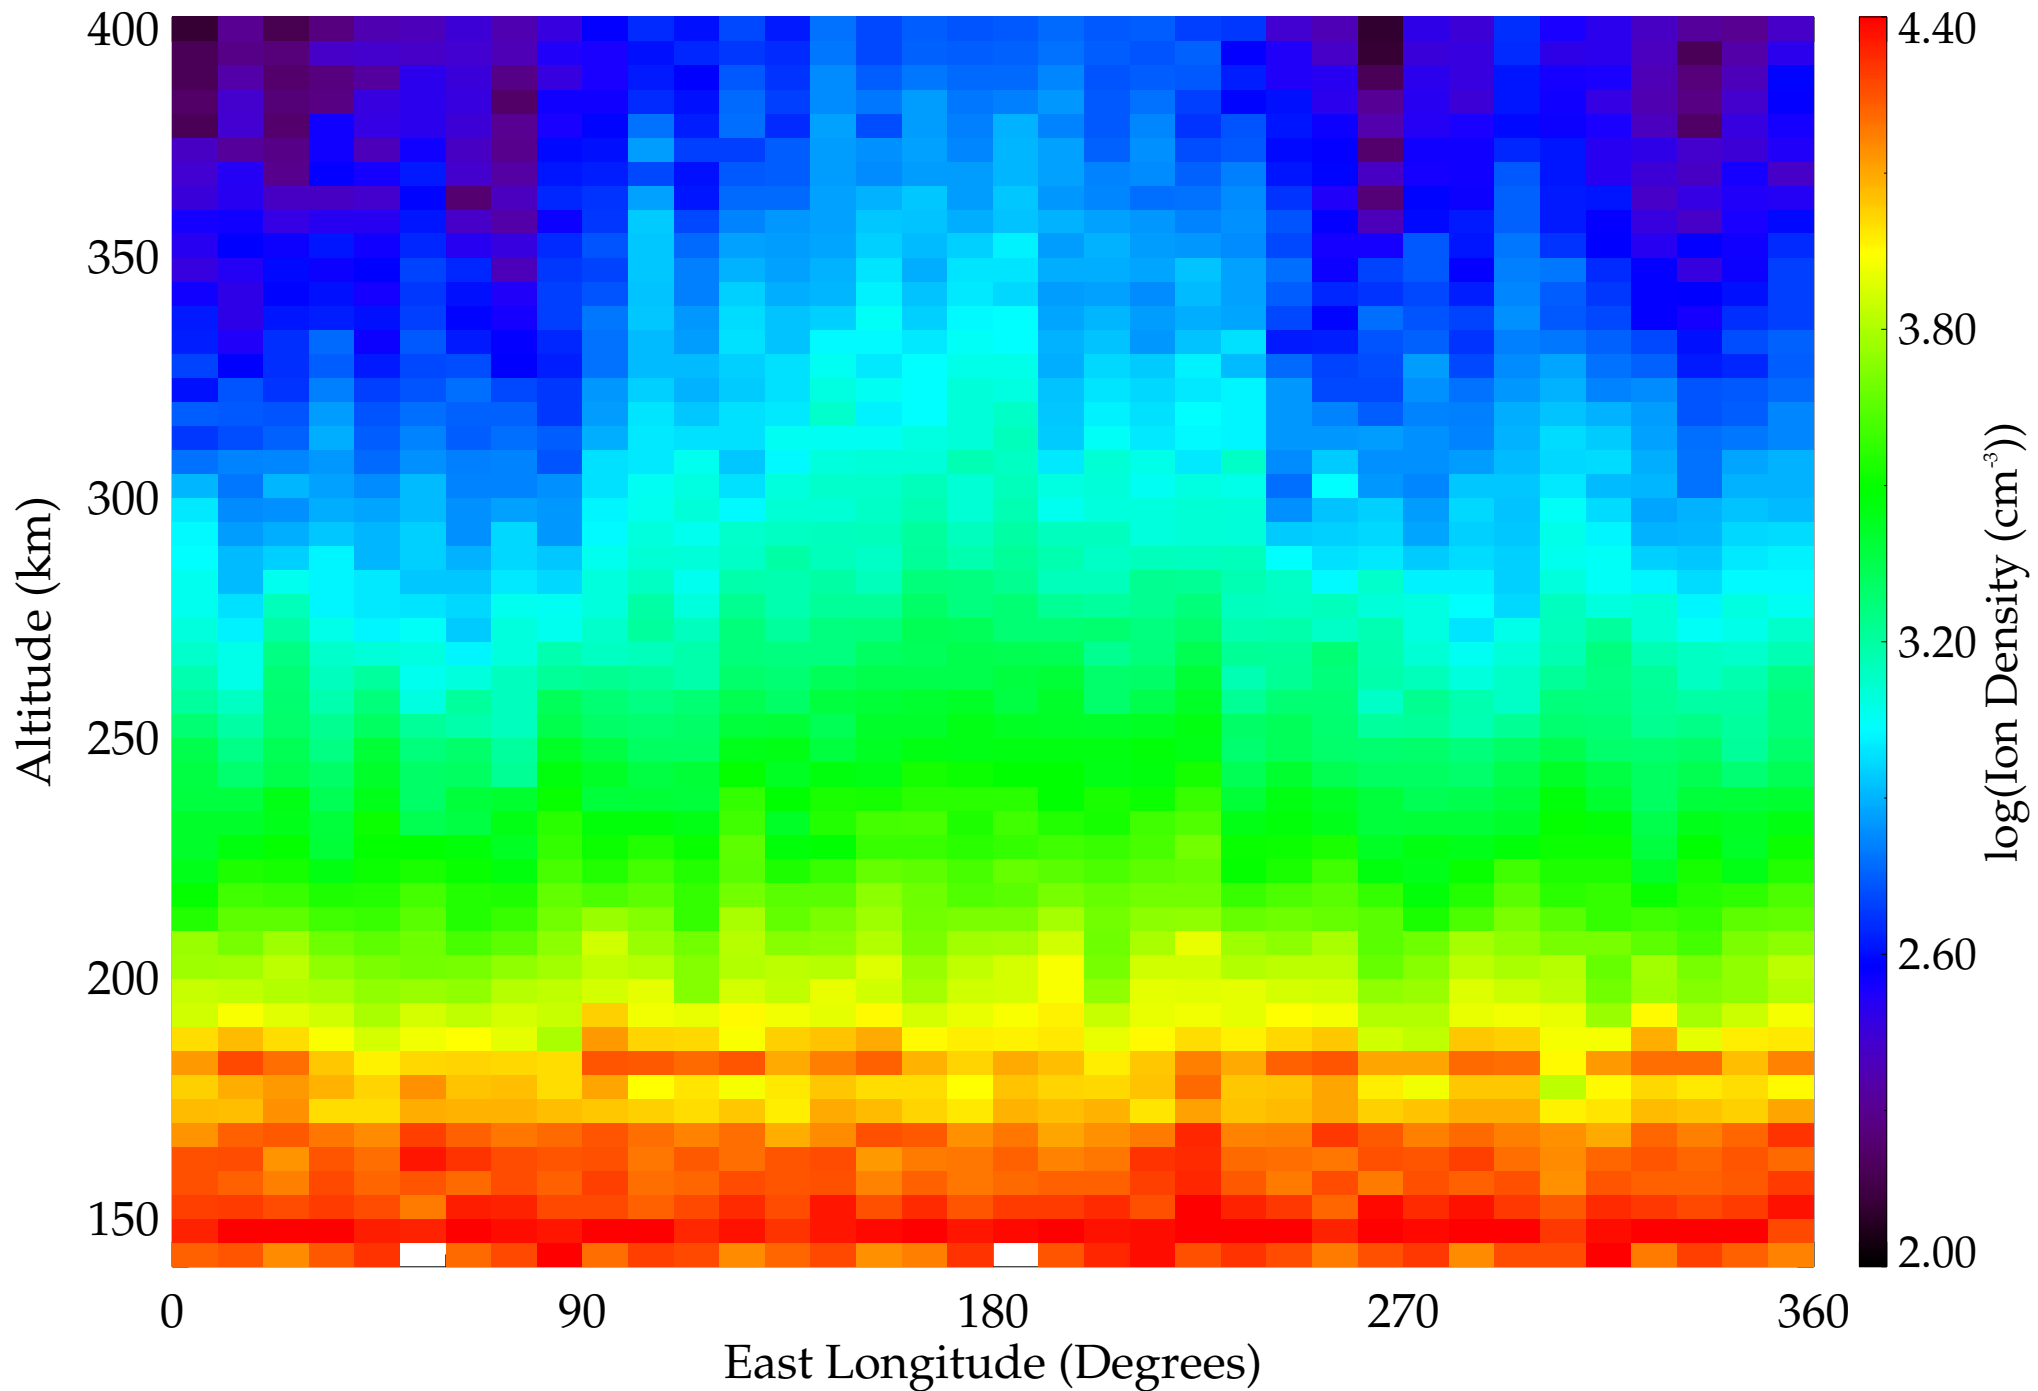

# Mass Number: 33

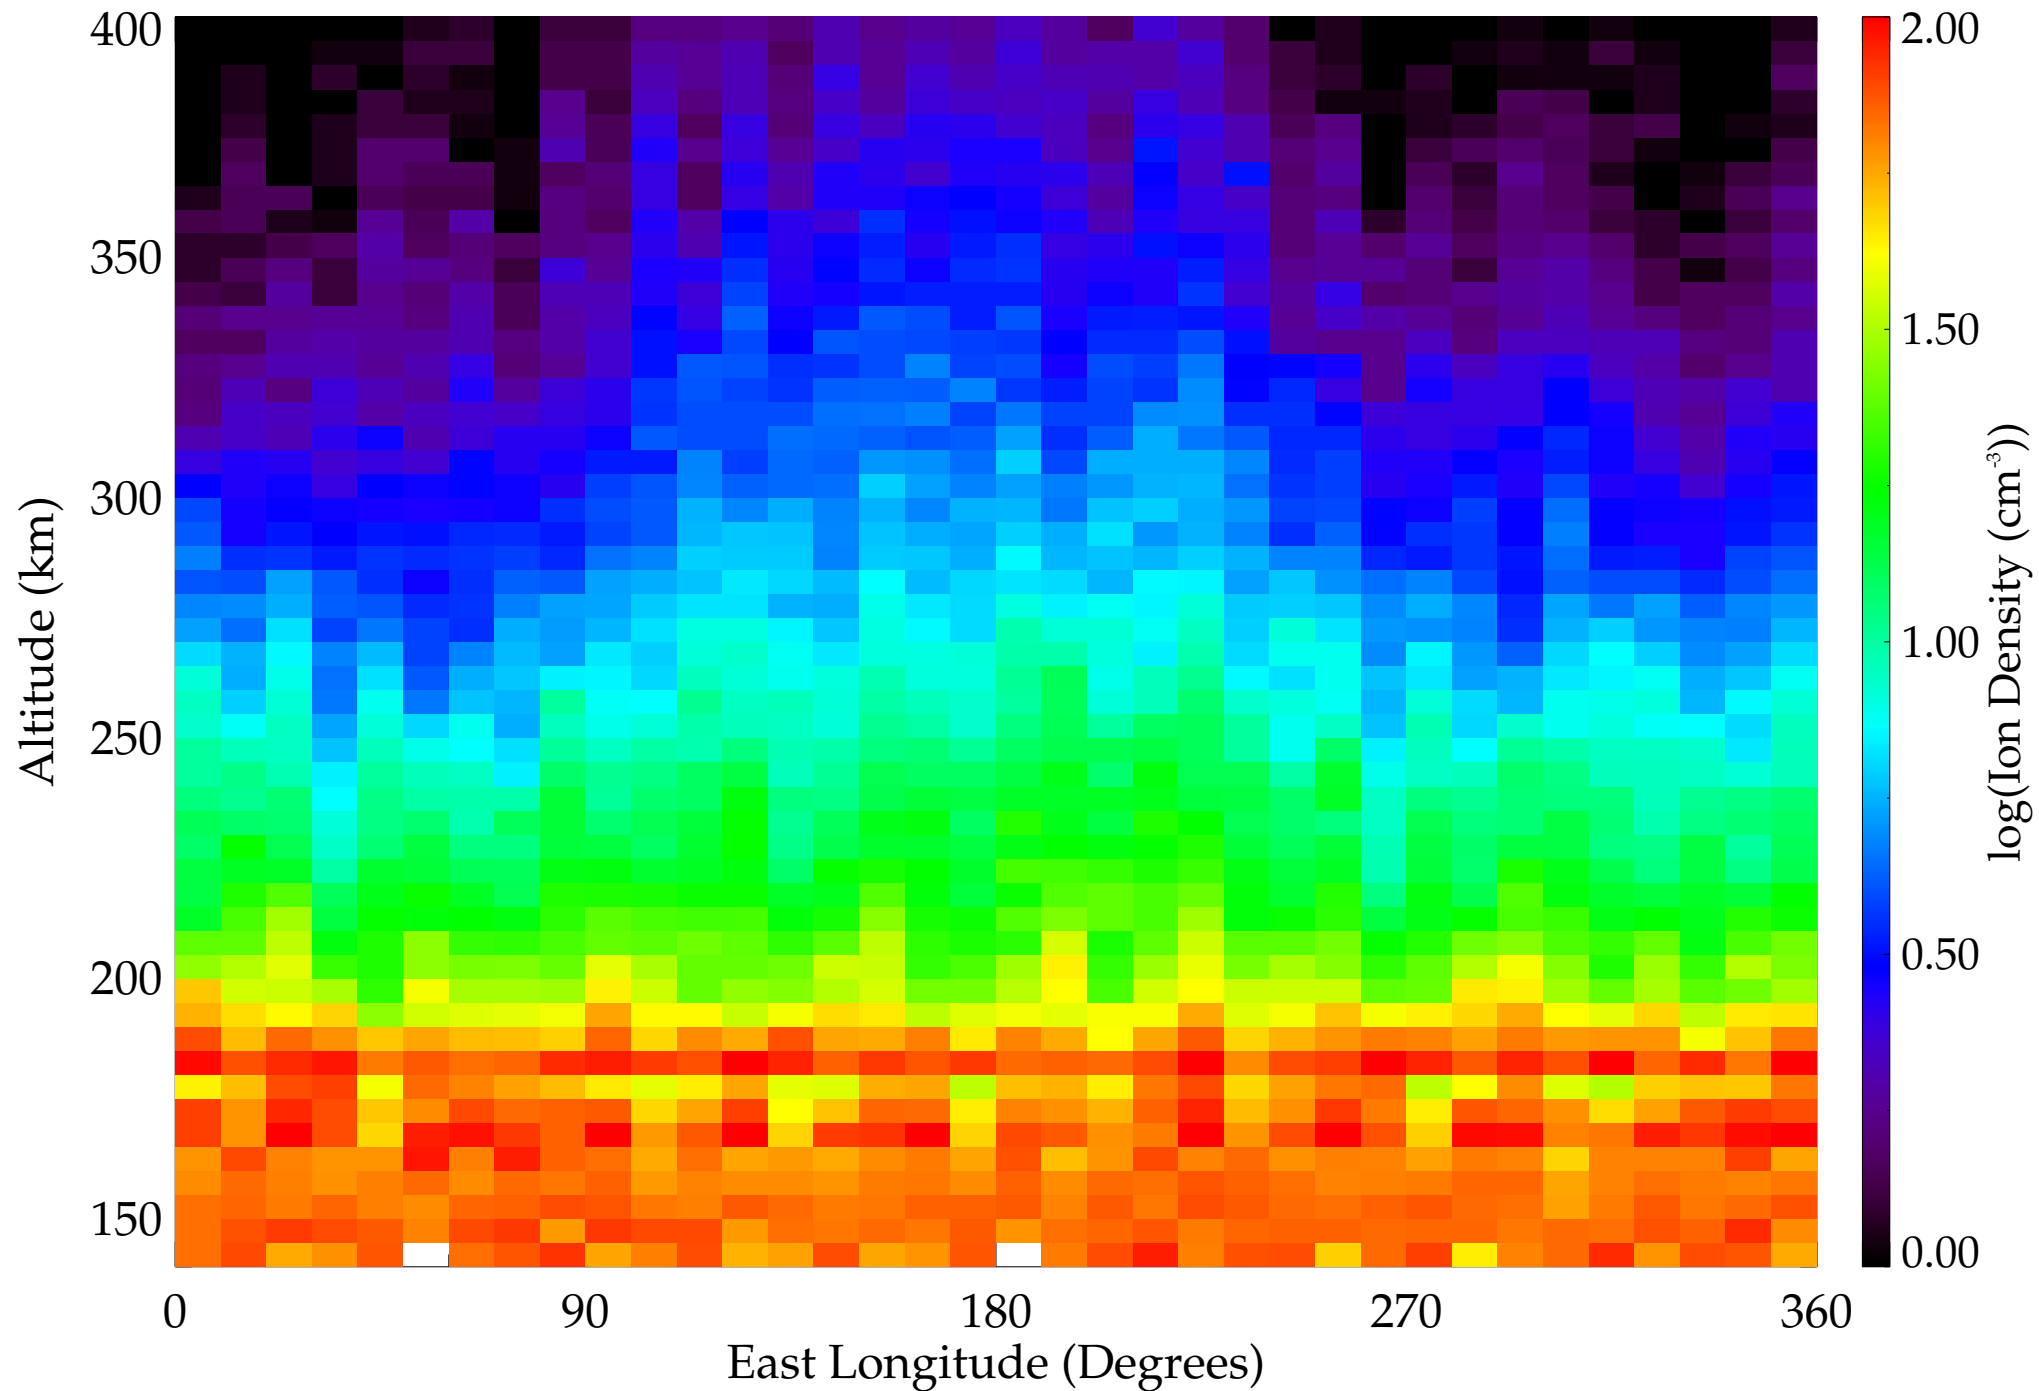

# Mass Number: 34

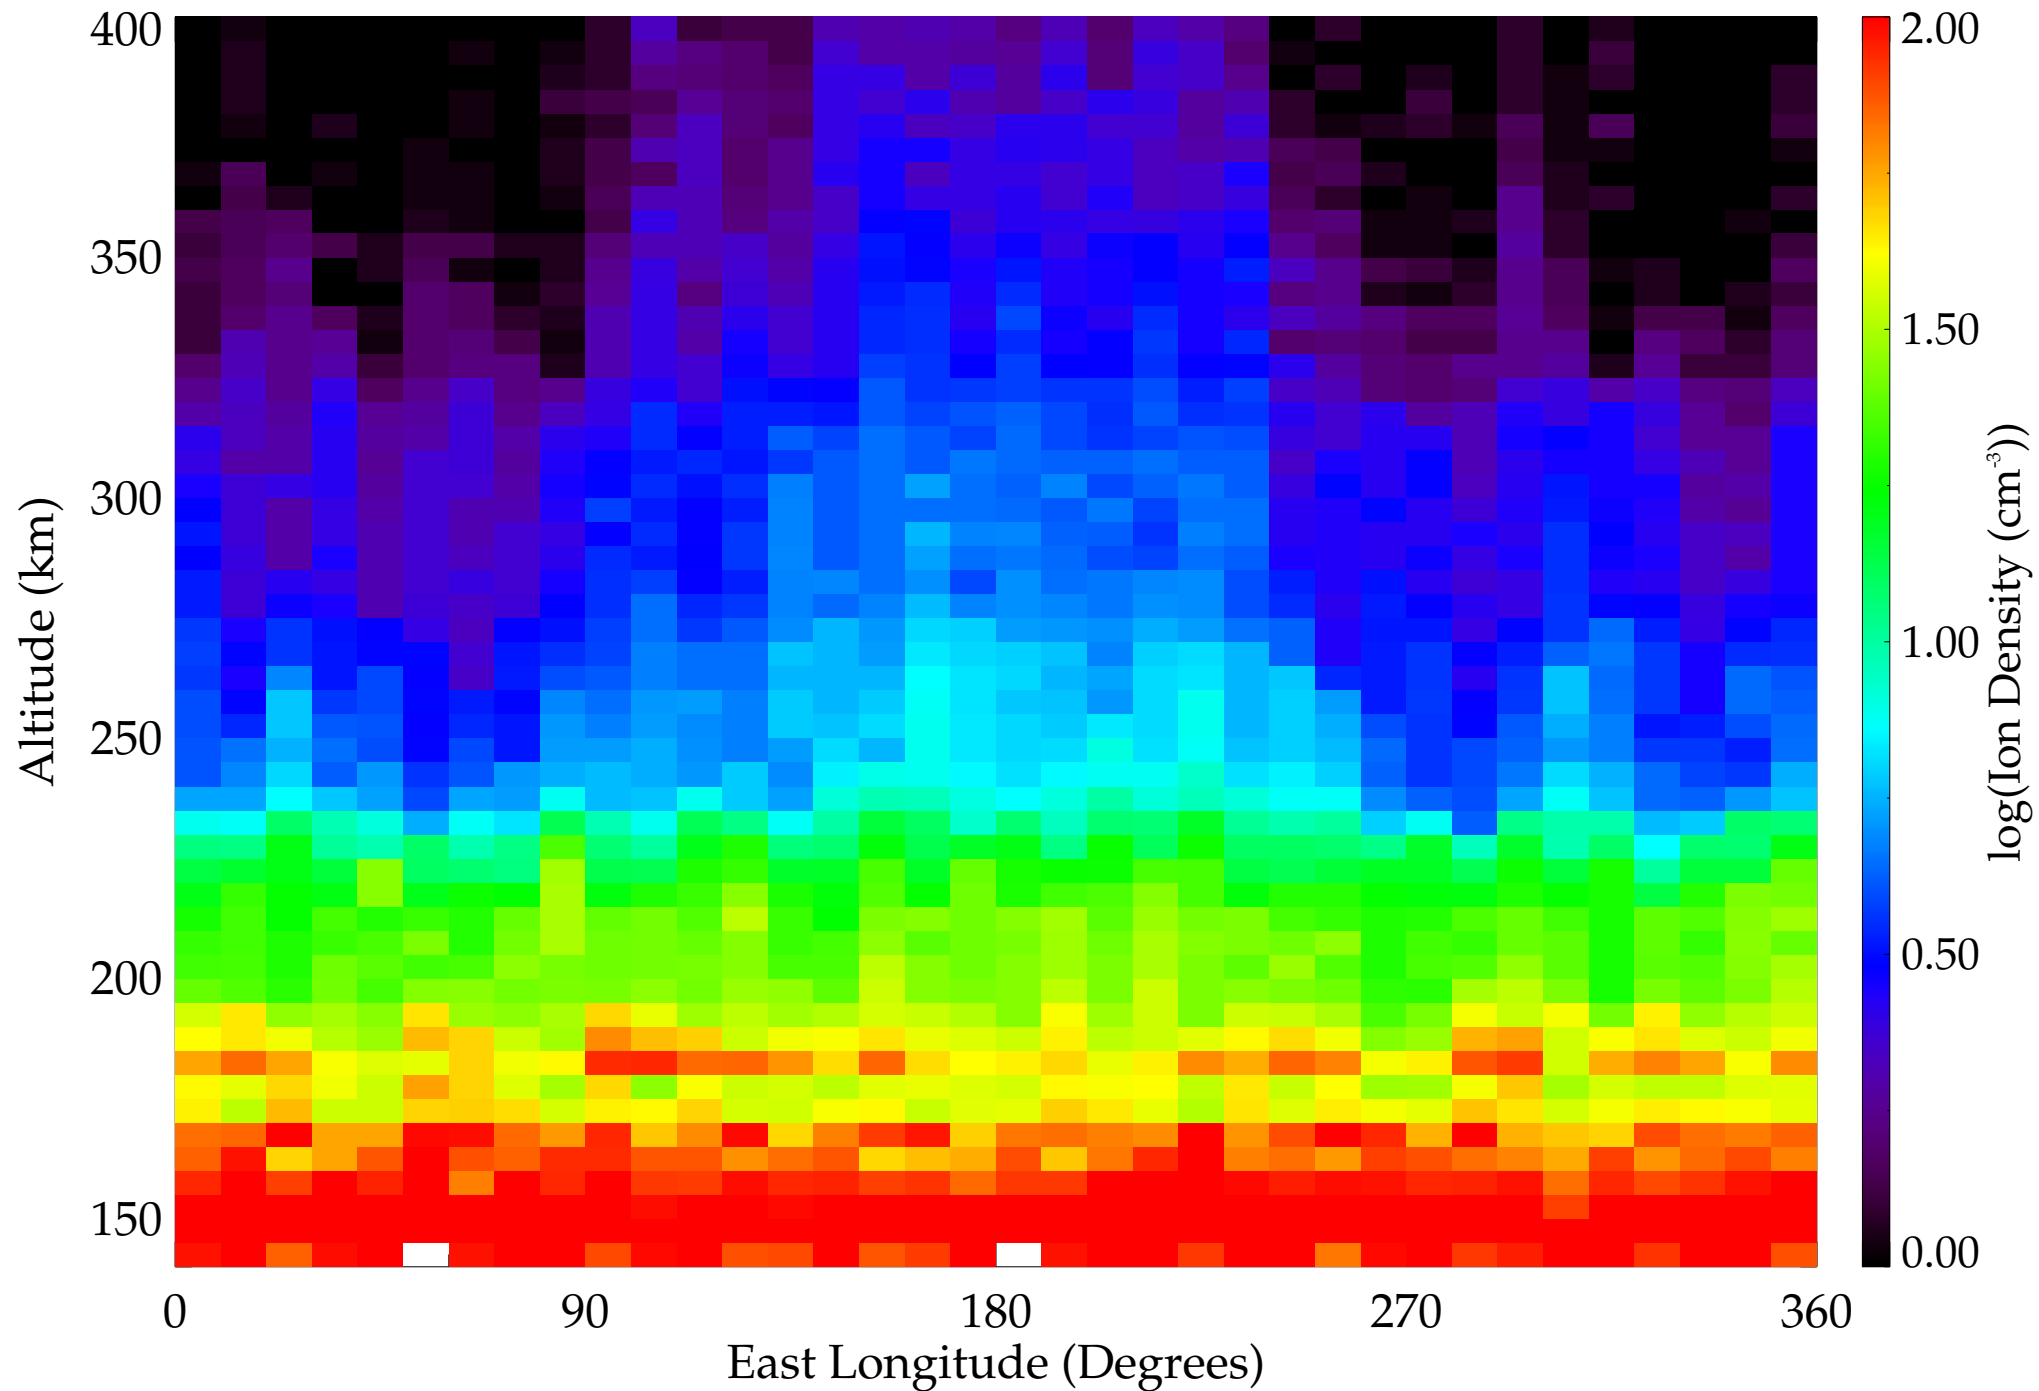

# Mass Number: 35

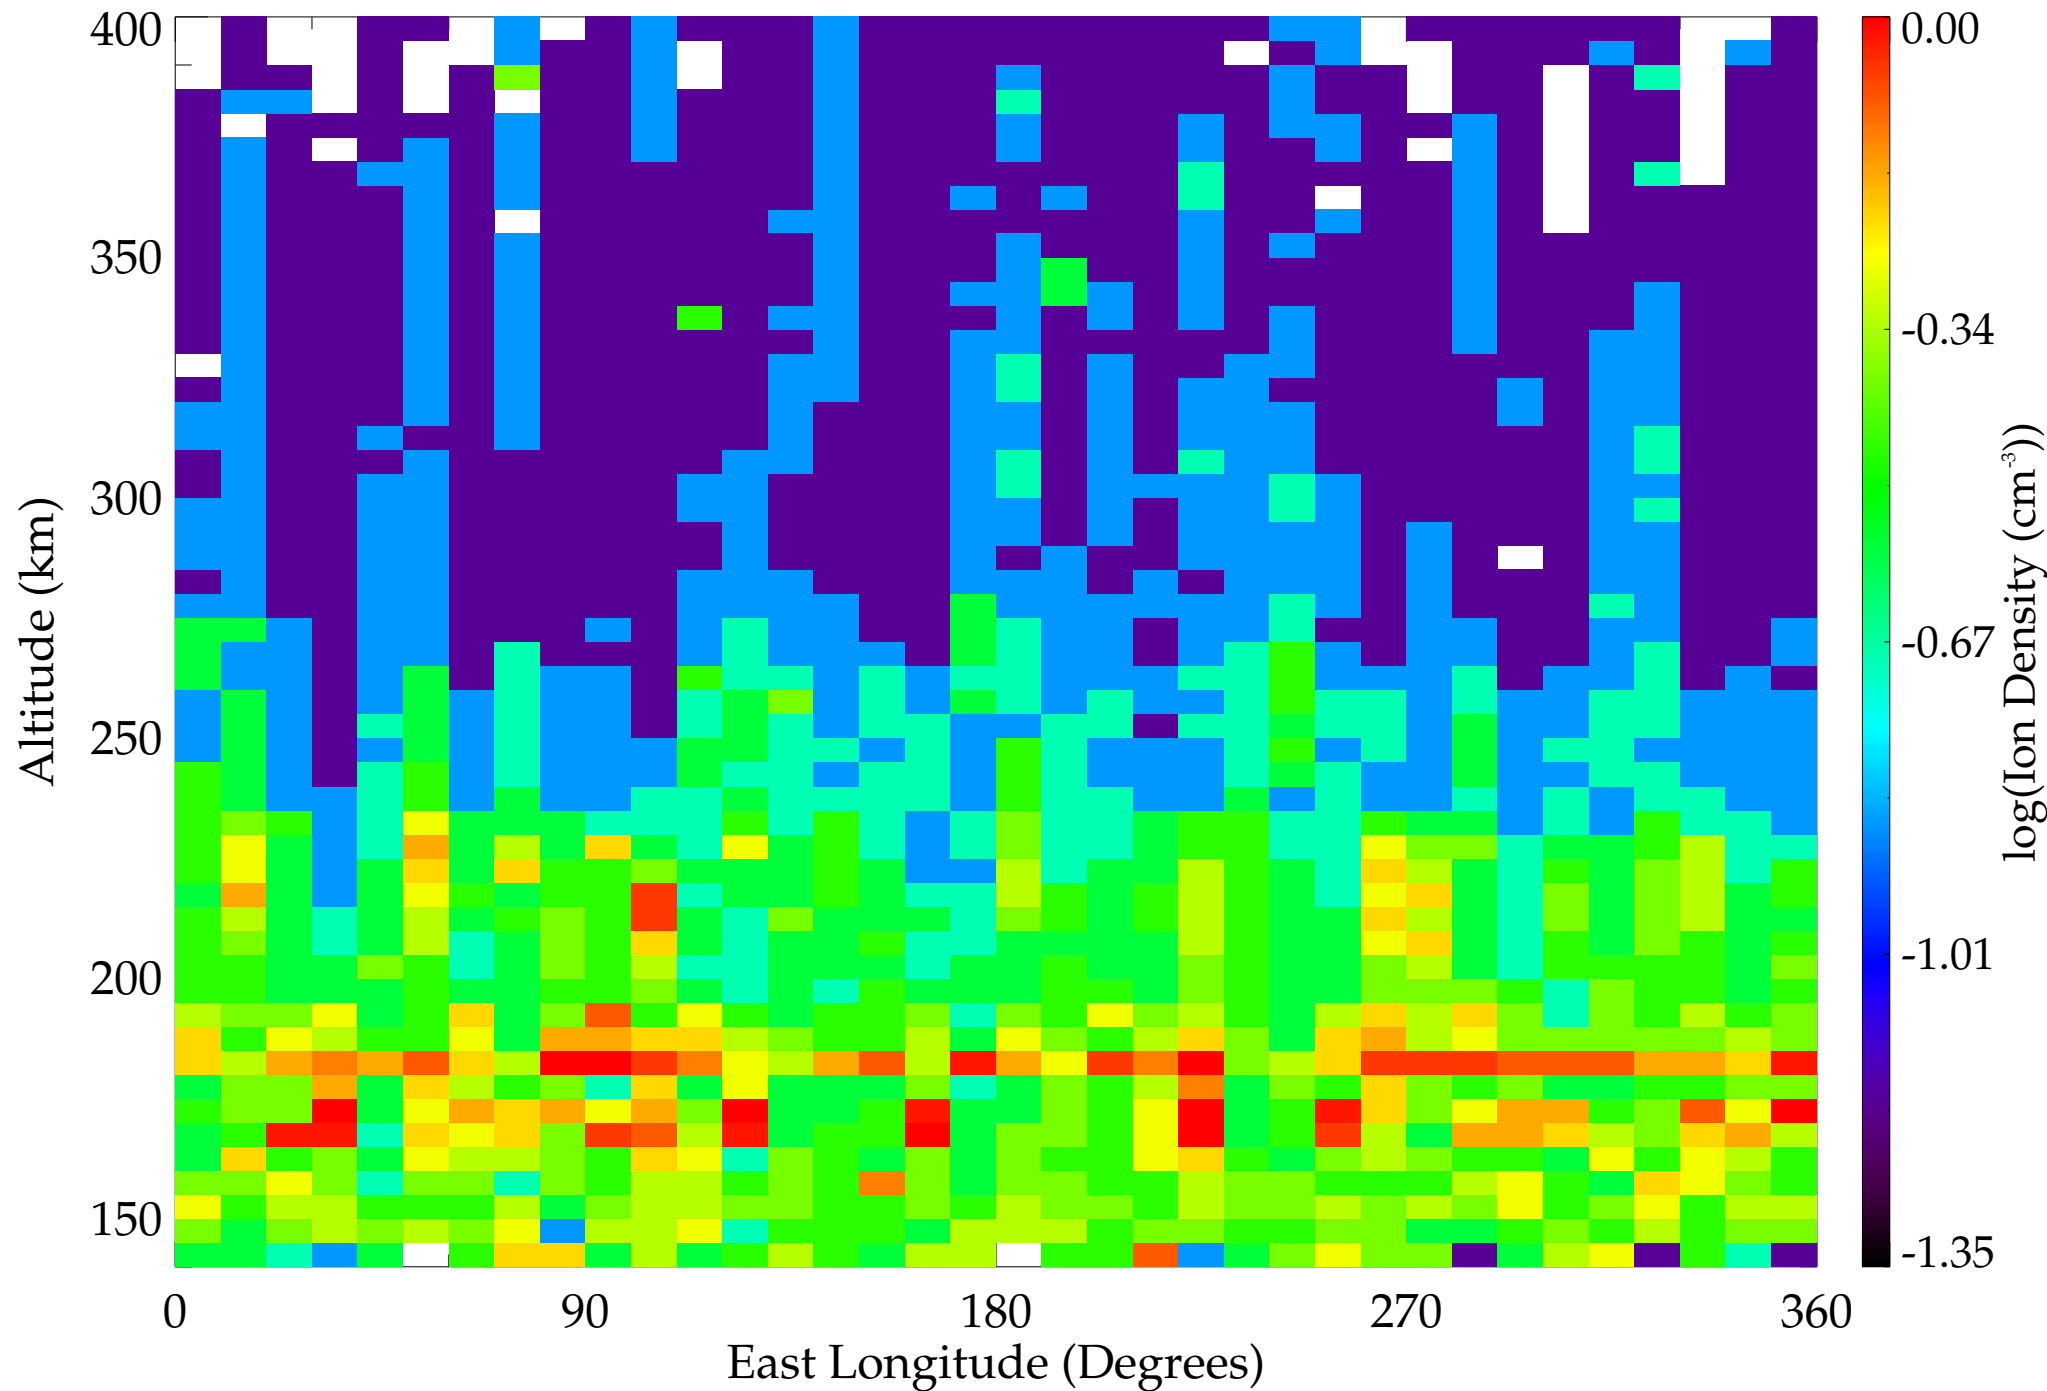

# Mass Number: 36

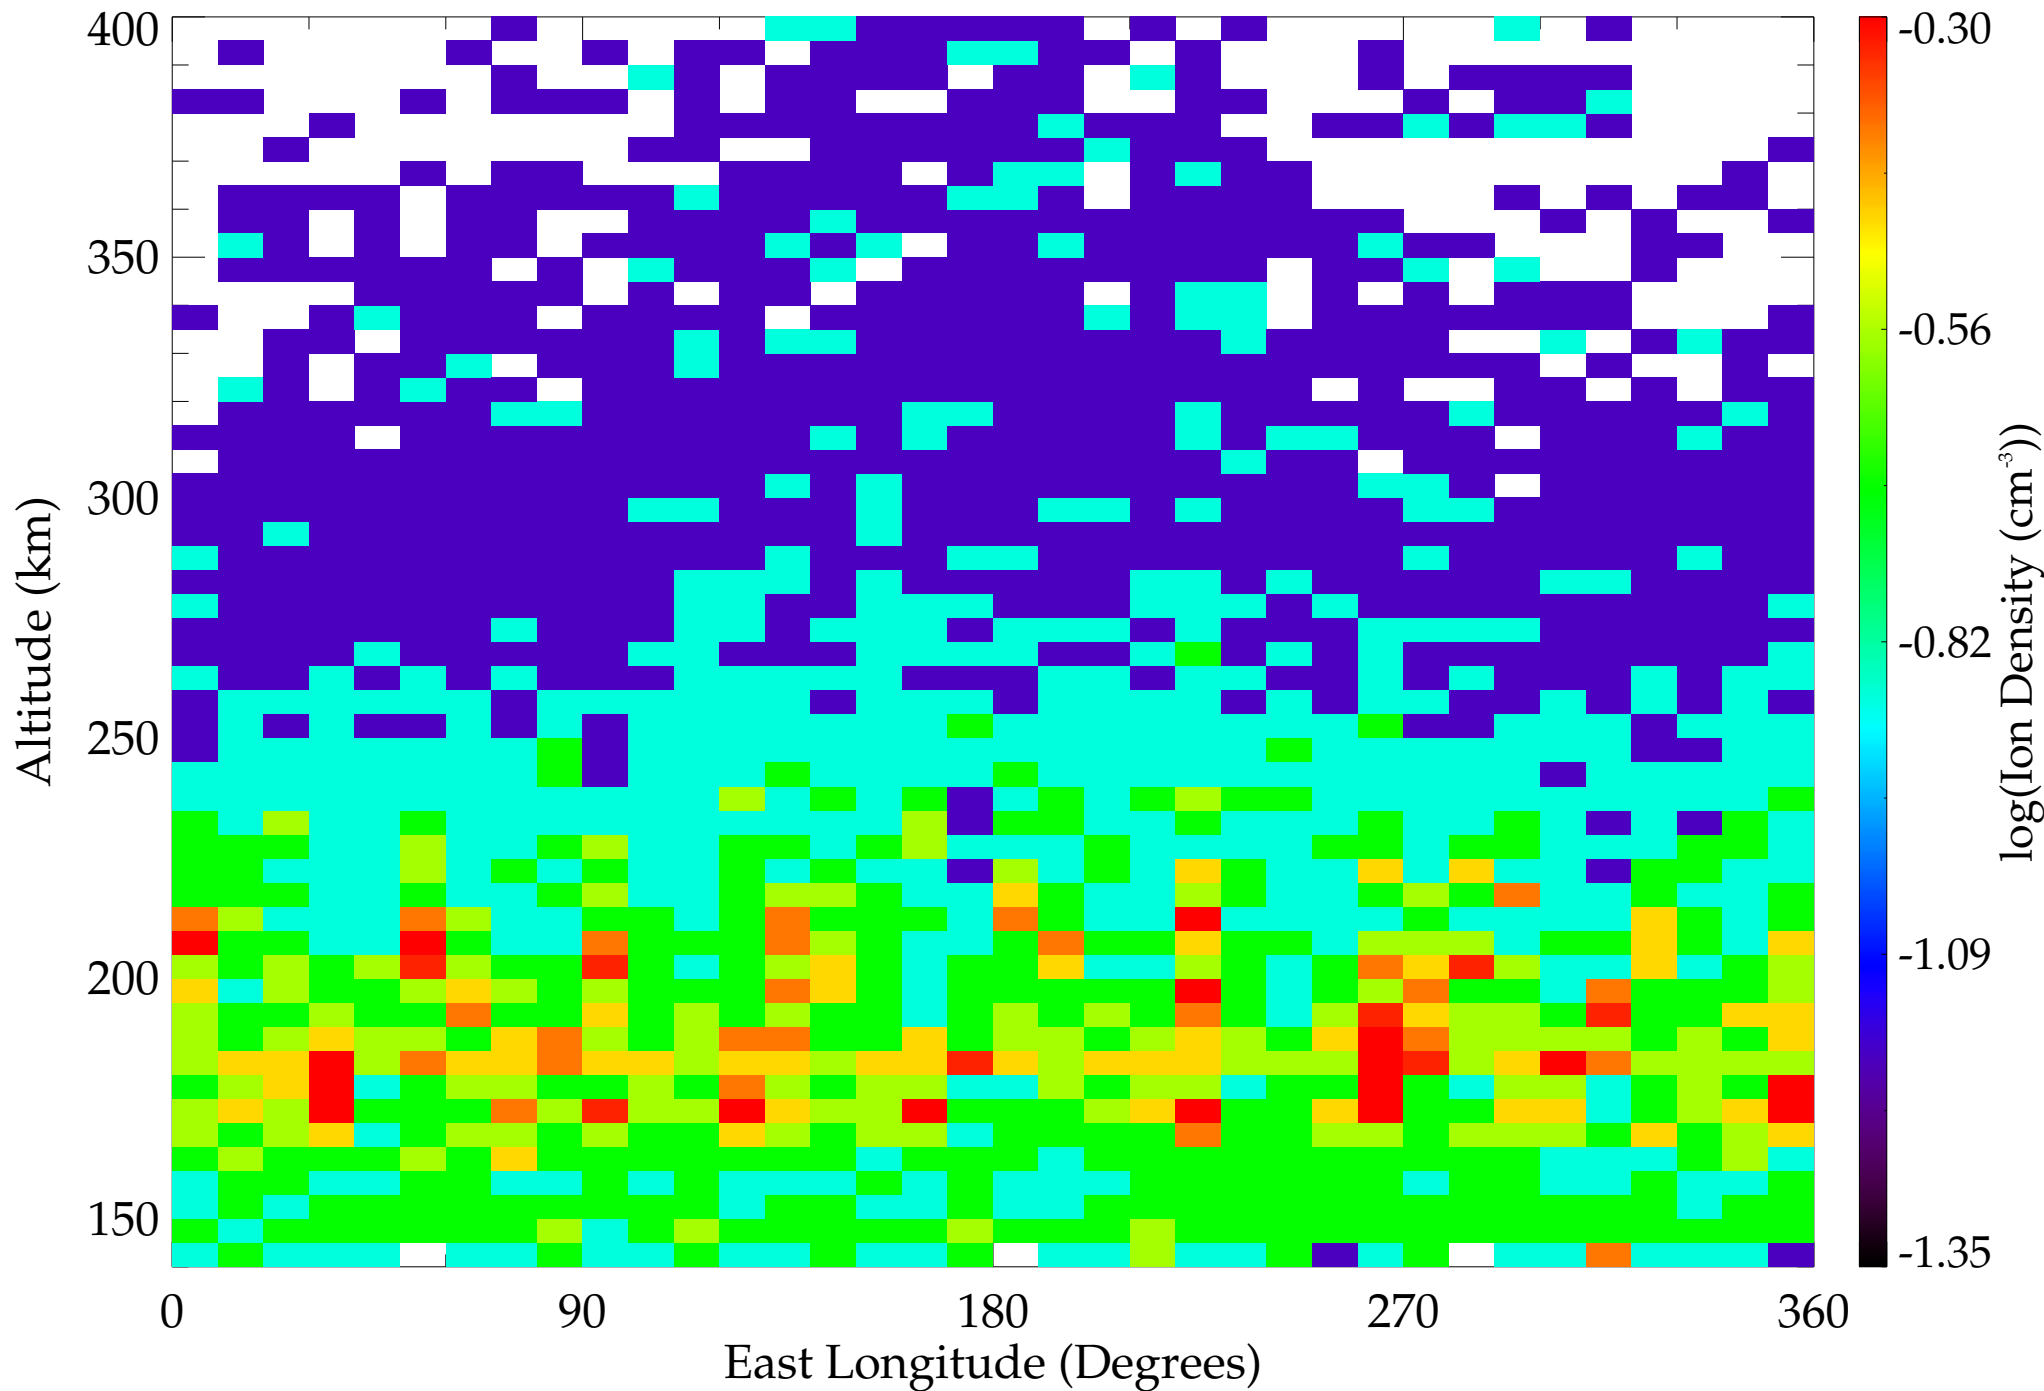

# Mass Number: 37

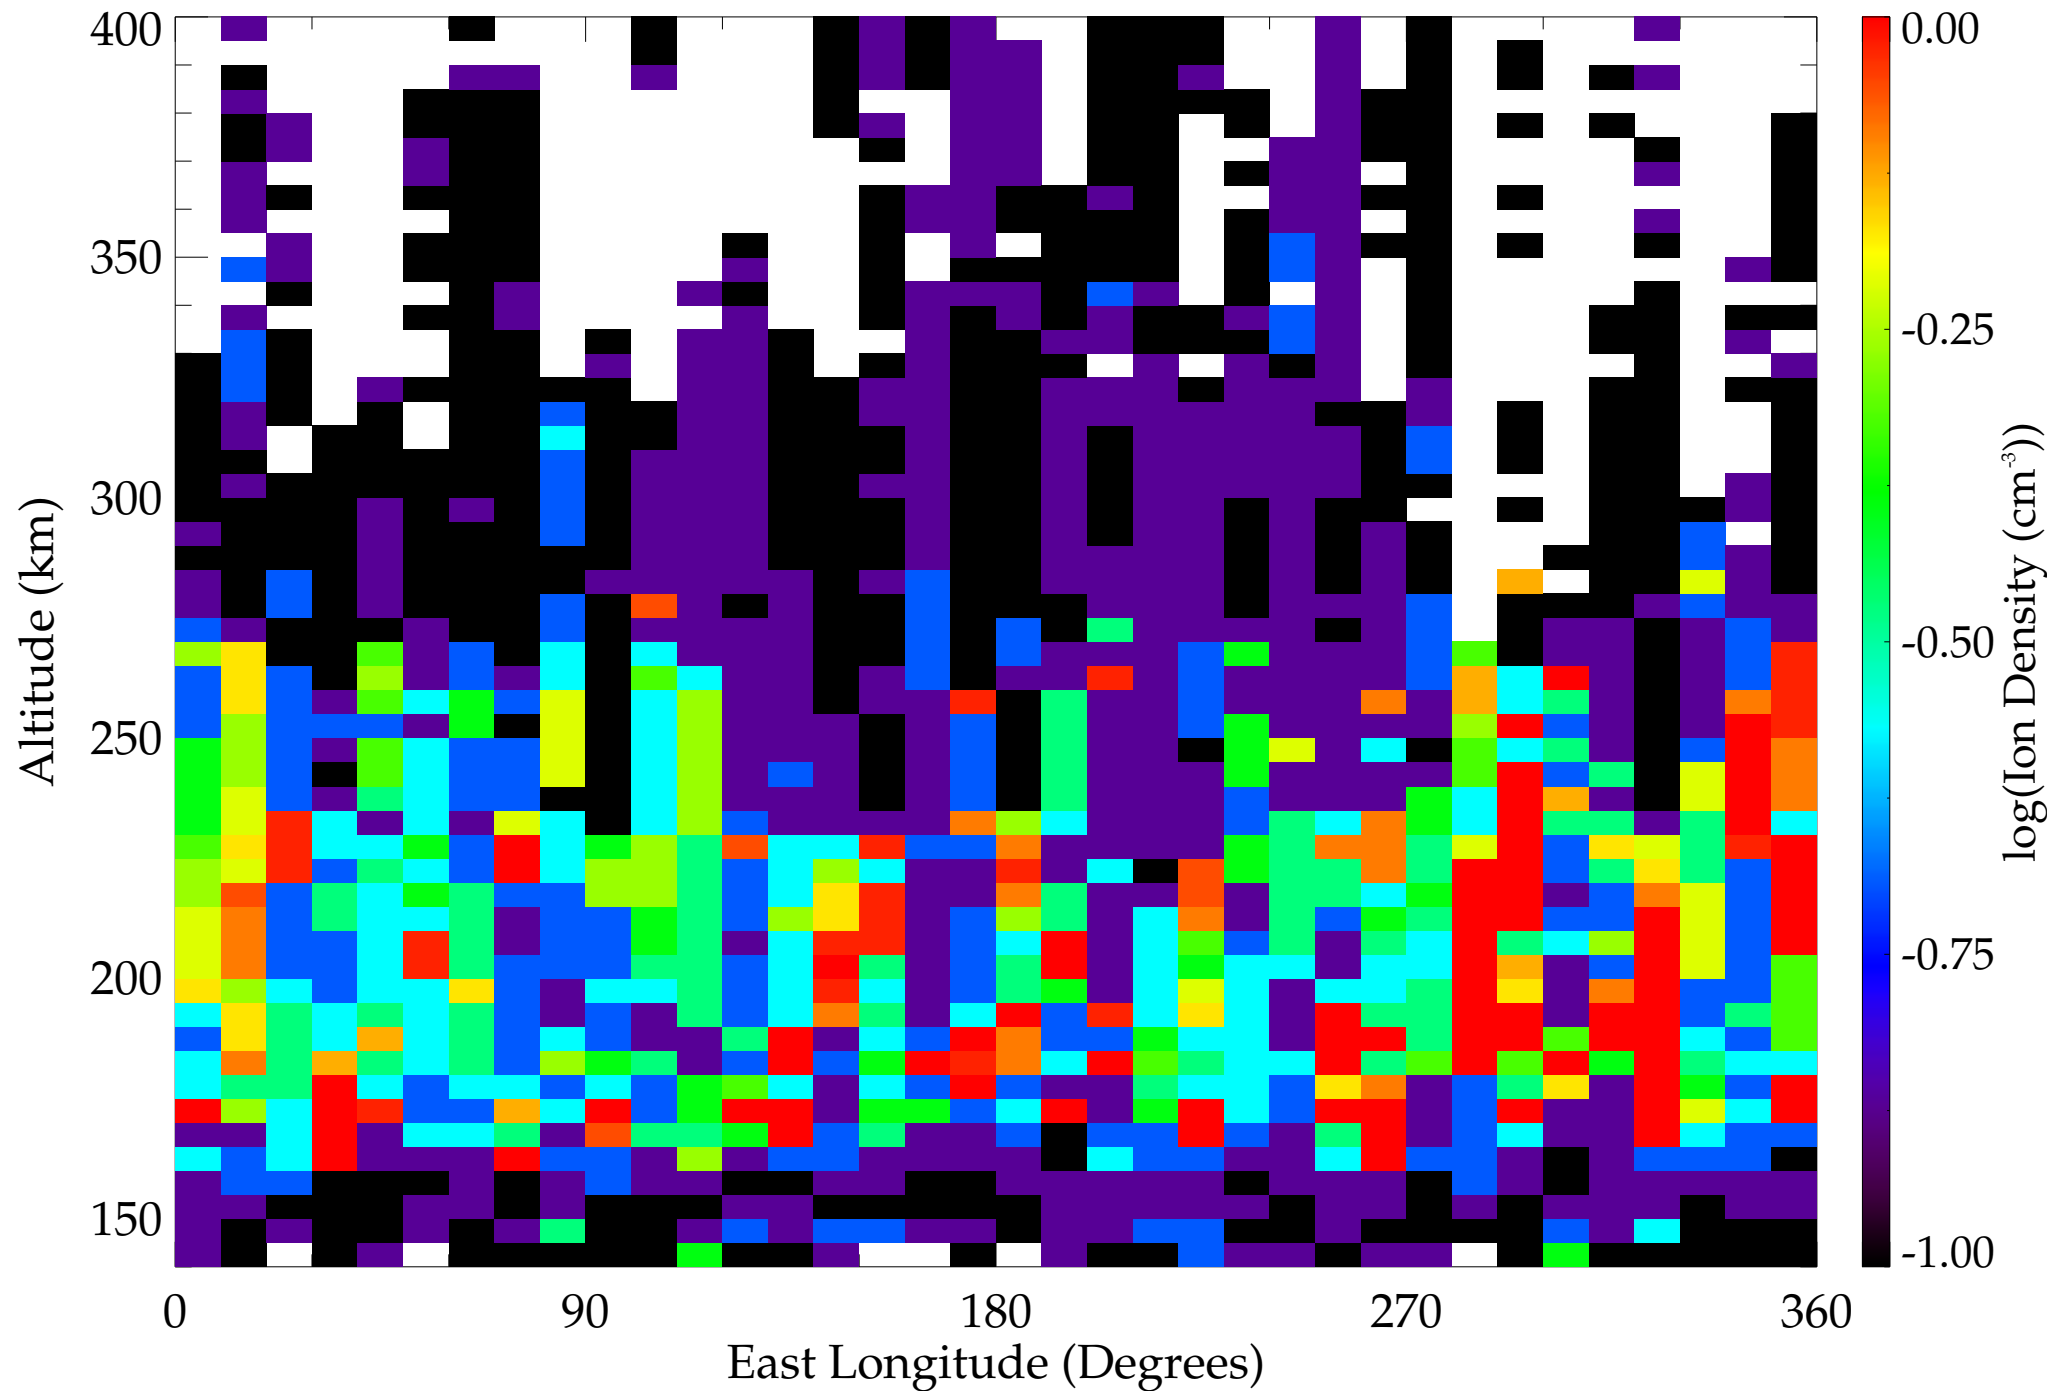

# Mass Number: 38

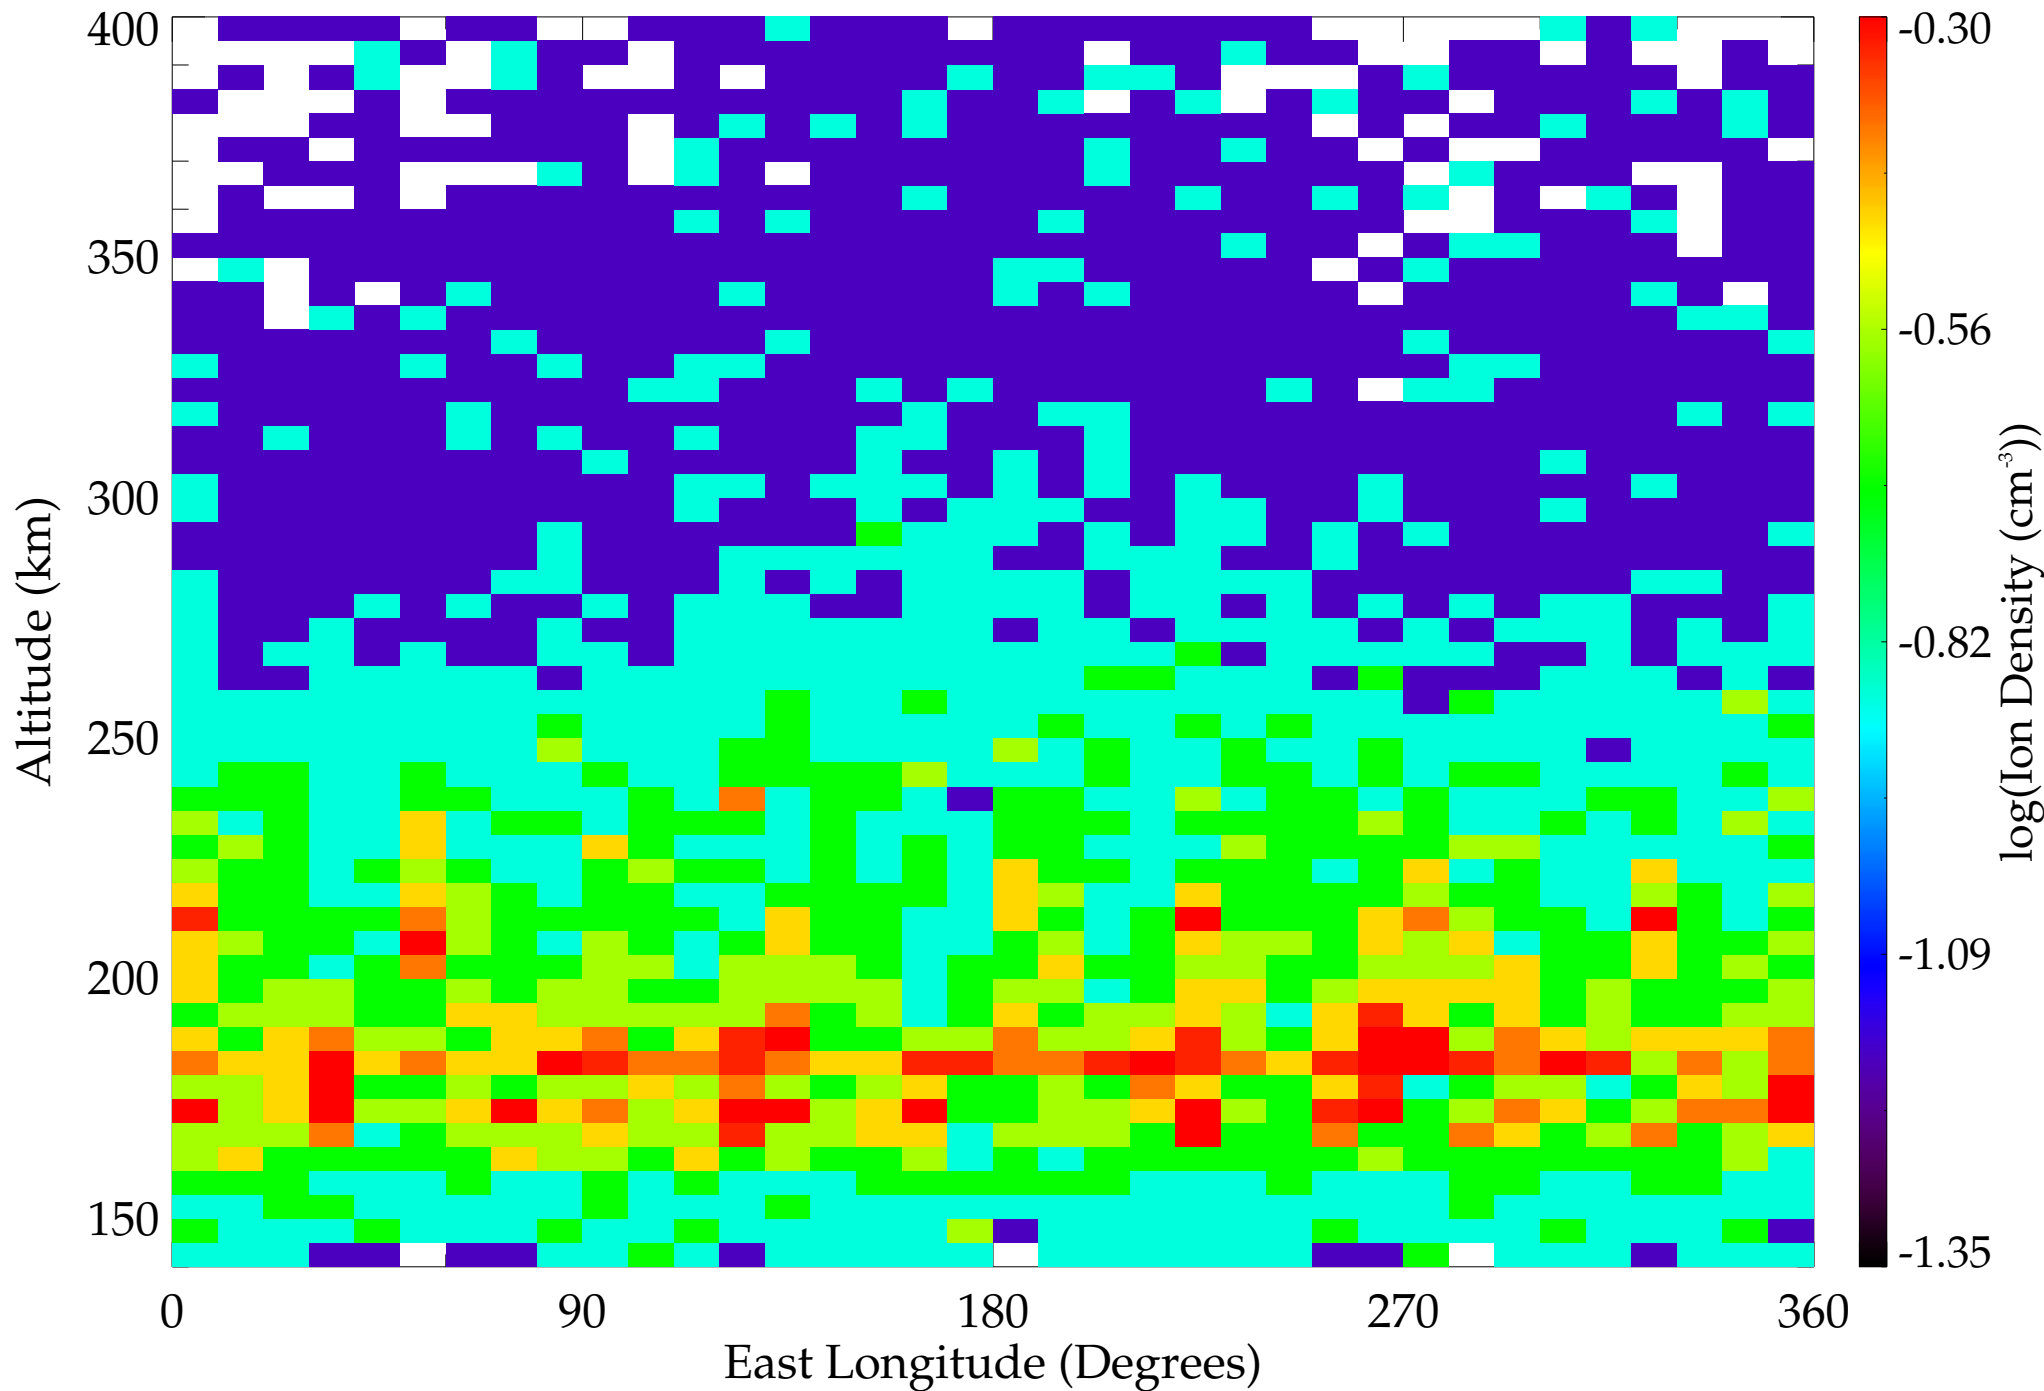



# Mass Number: 39

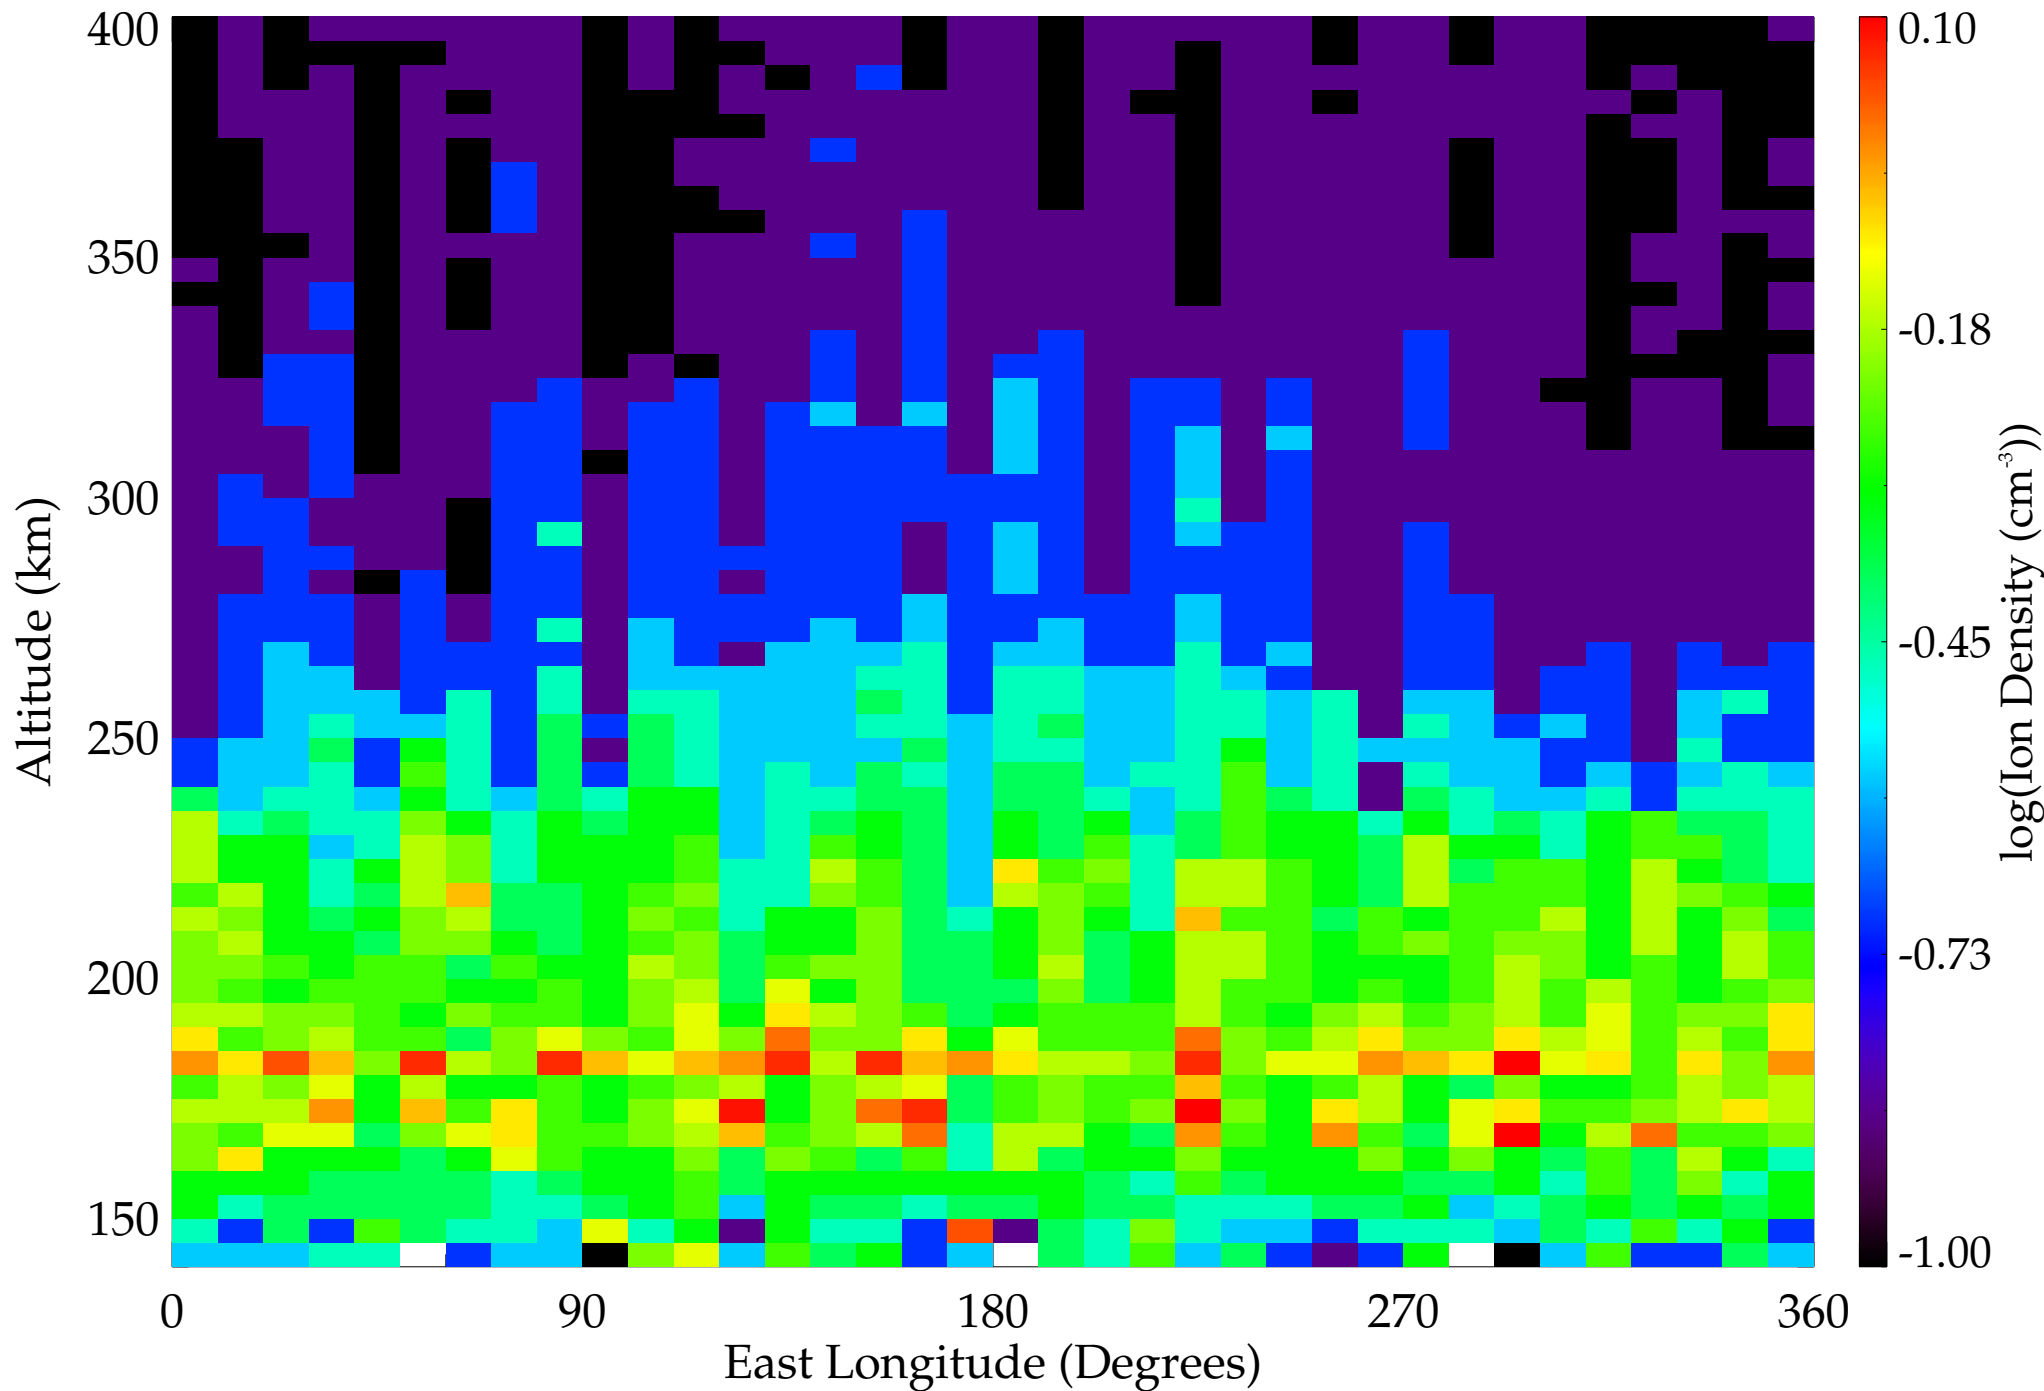

# Mass Number: 40

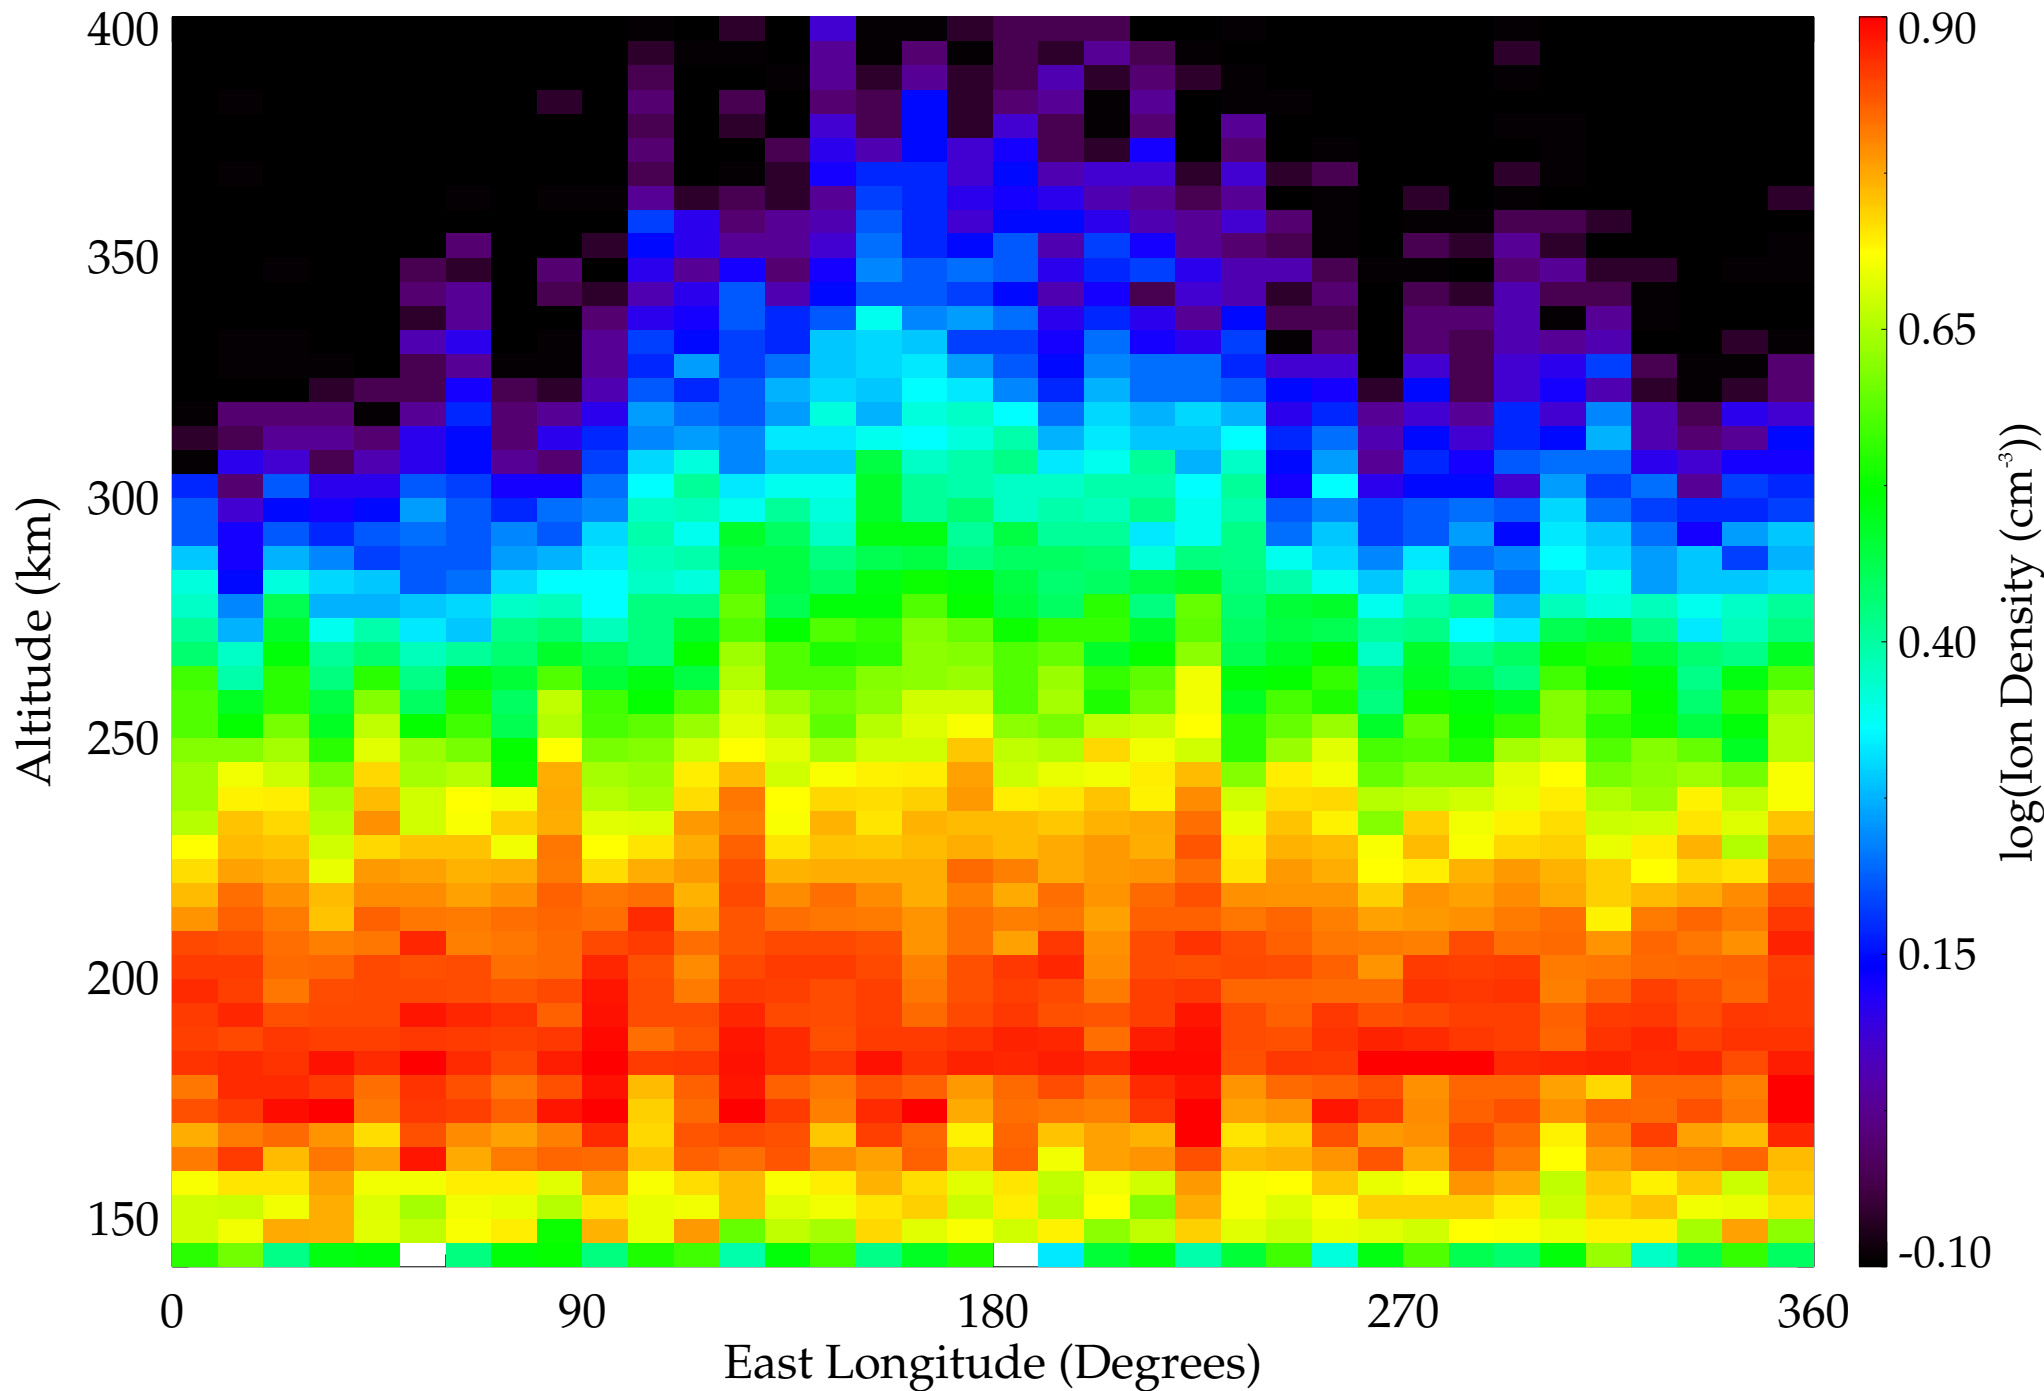

# Mass Number: 41

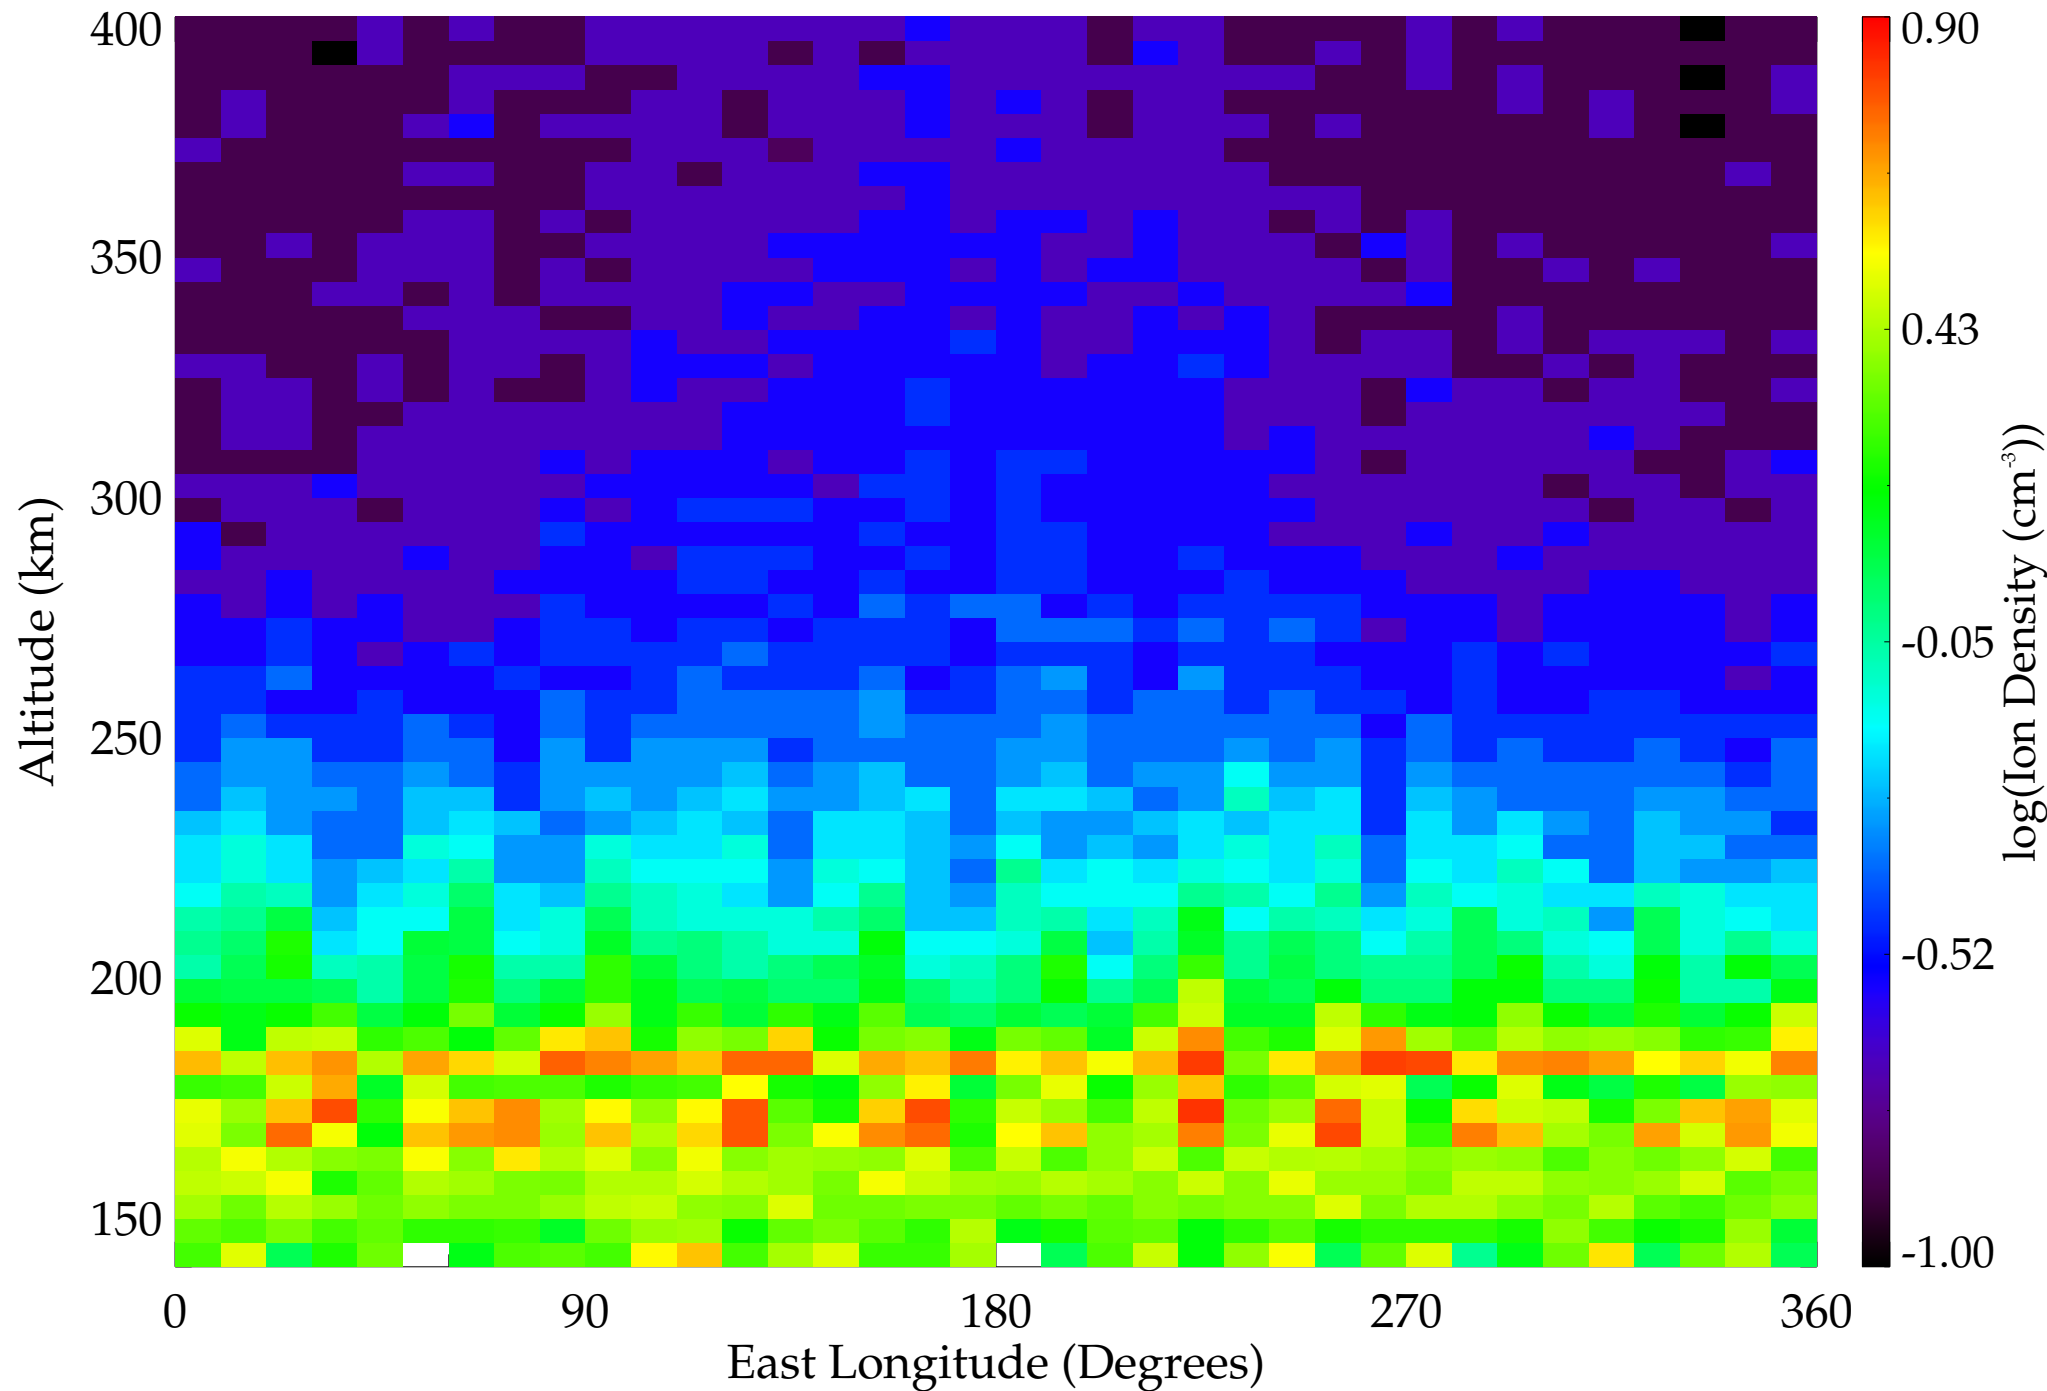

# Mass Number: 42

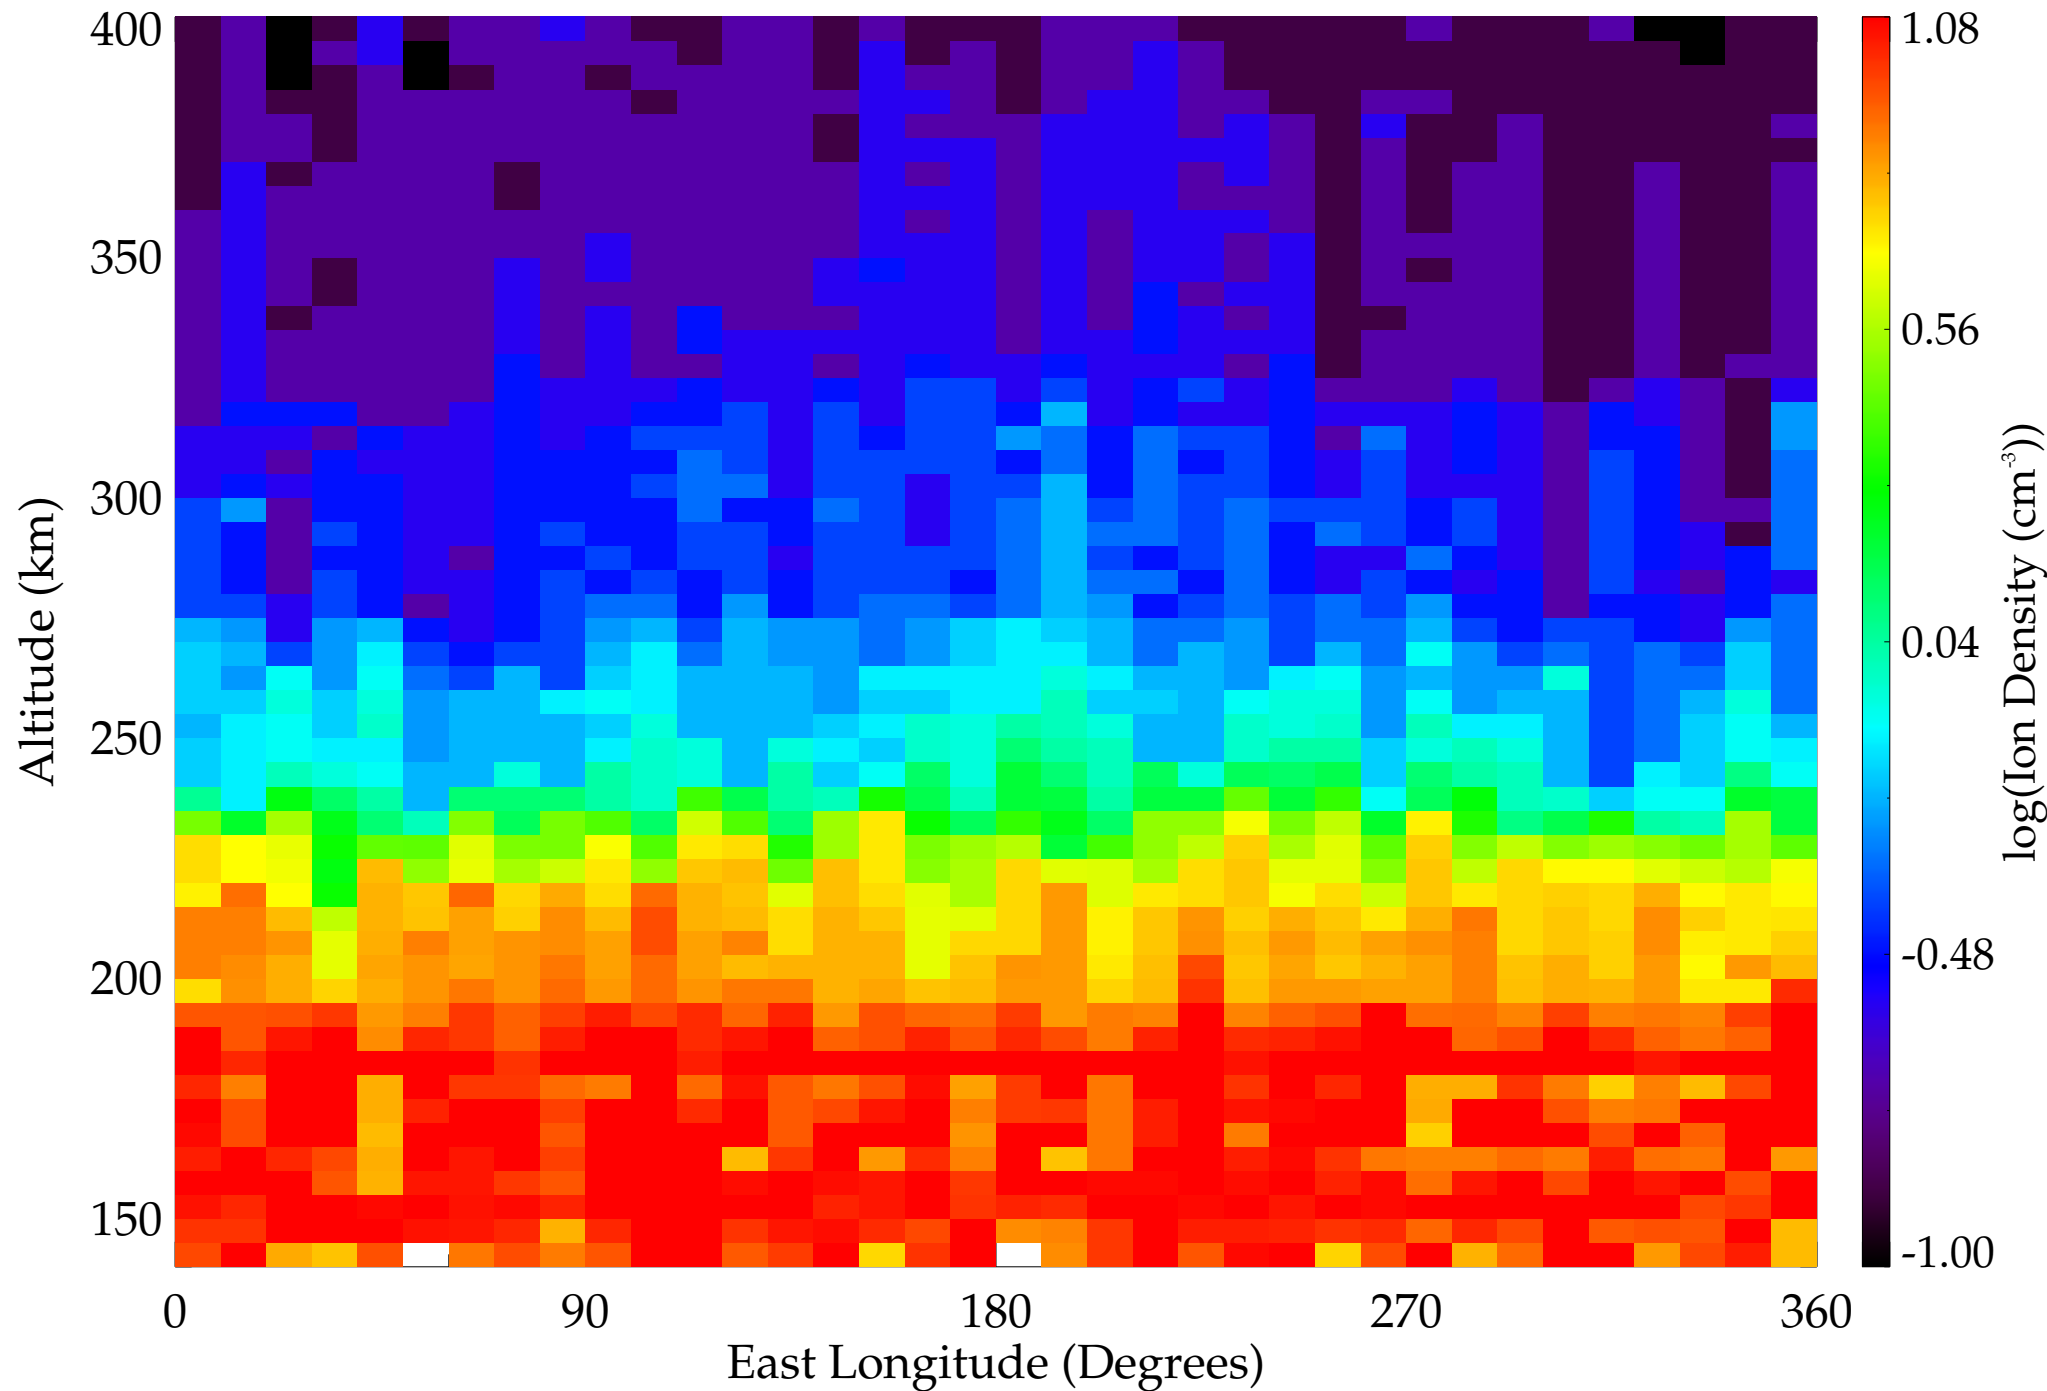

# Mass Number: 43

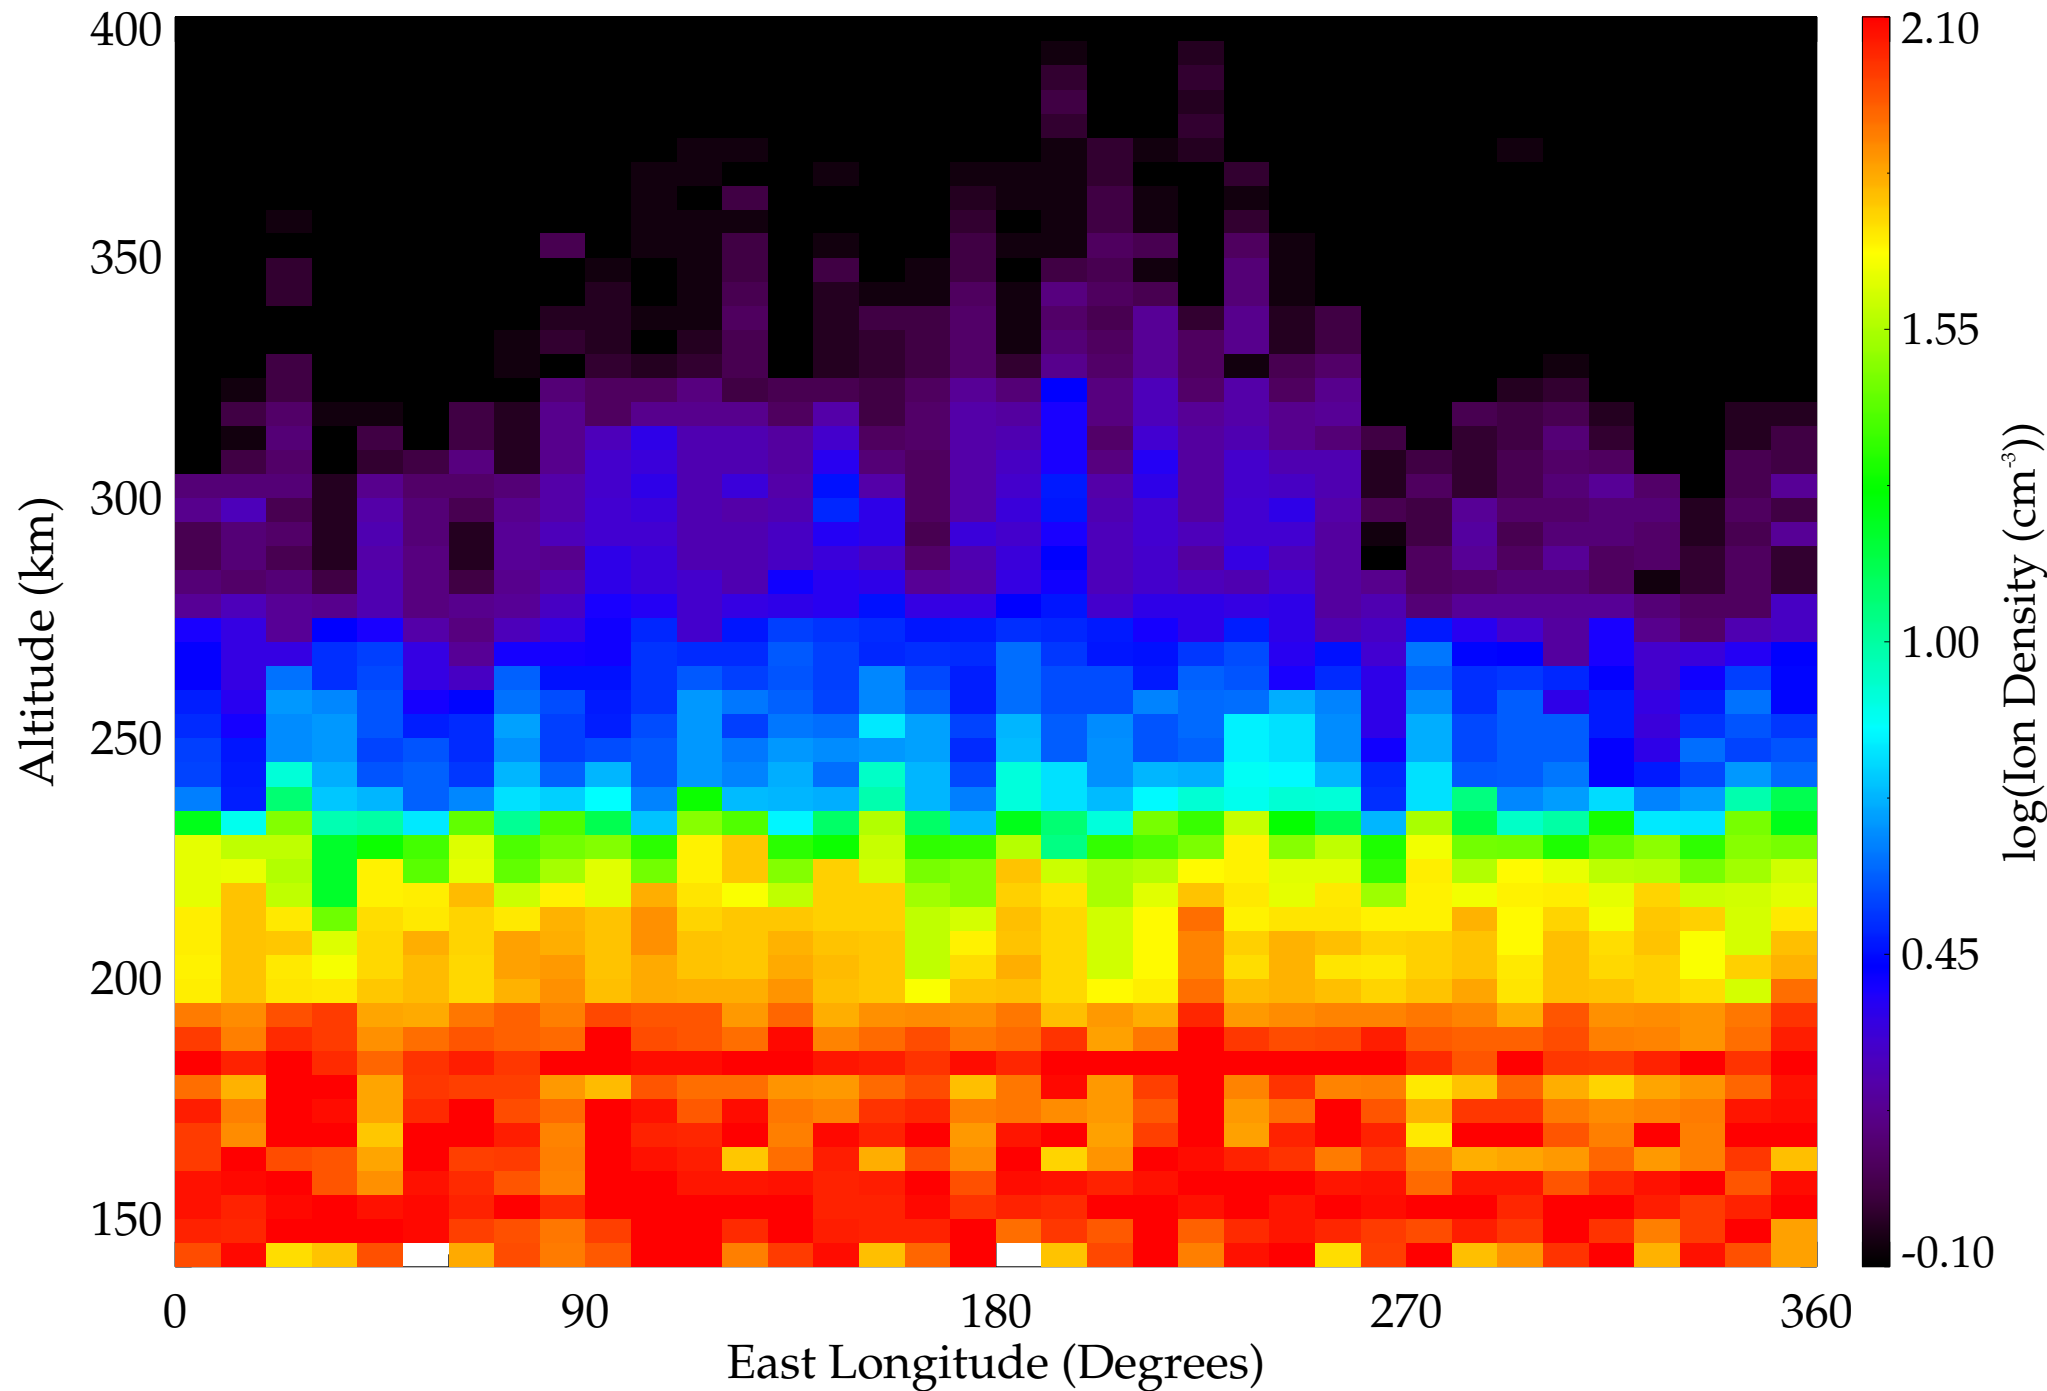

# Mass Number: 44

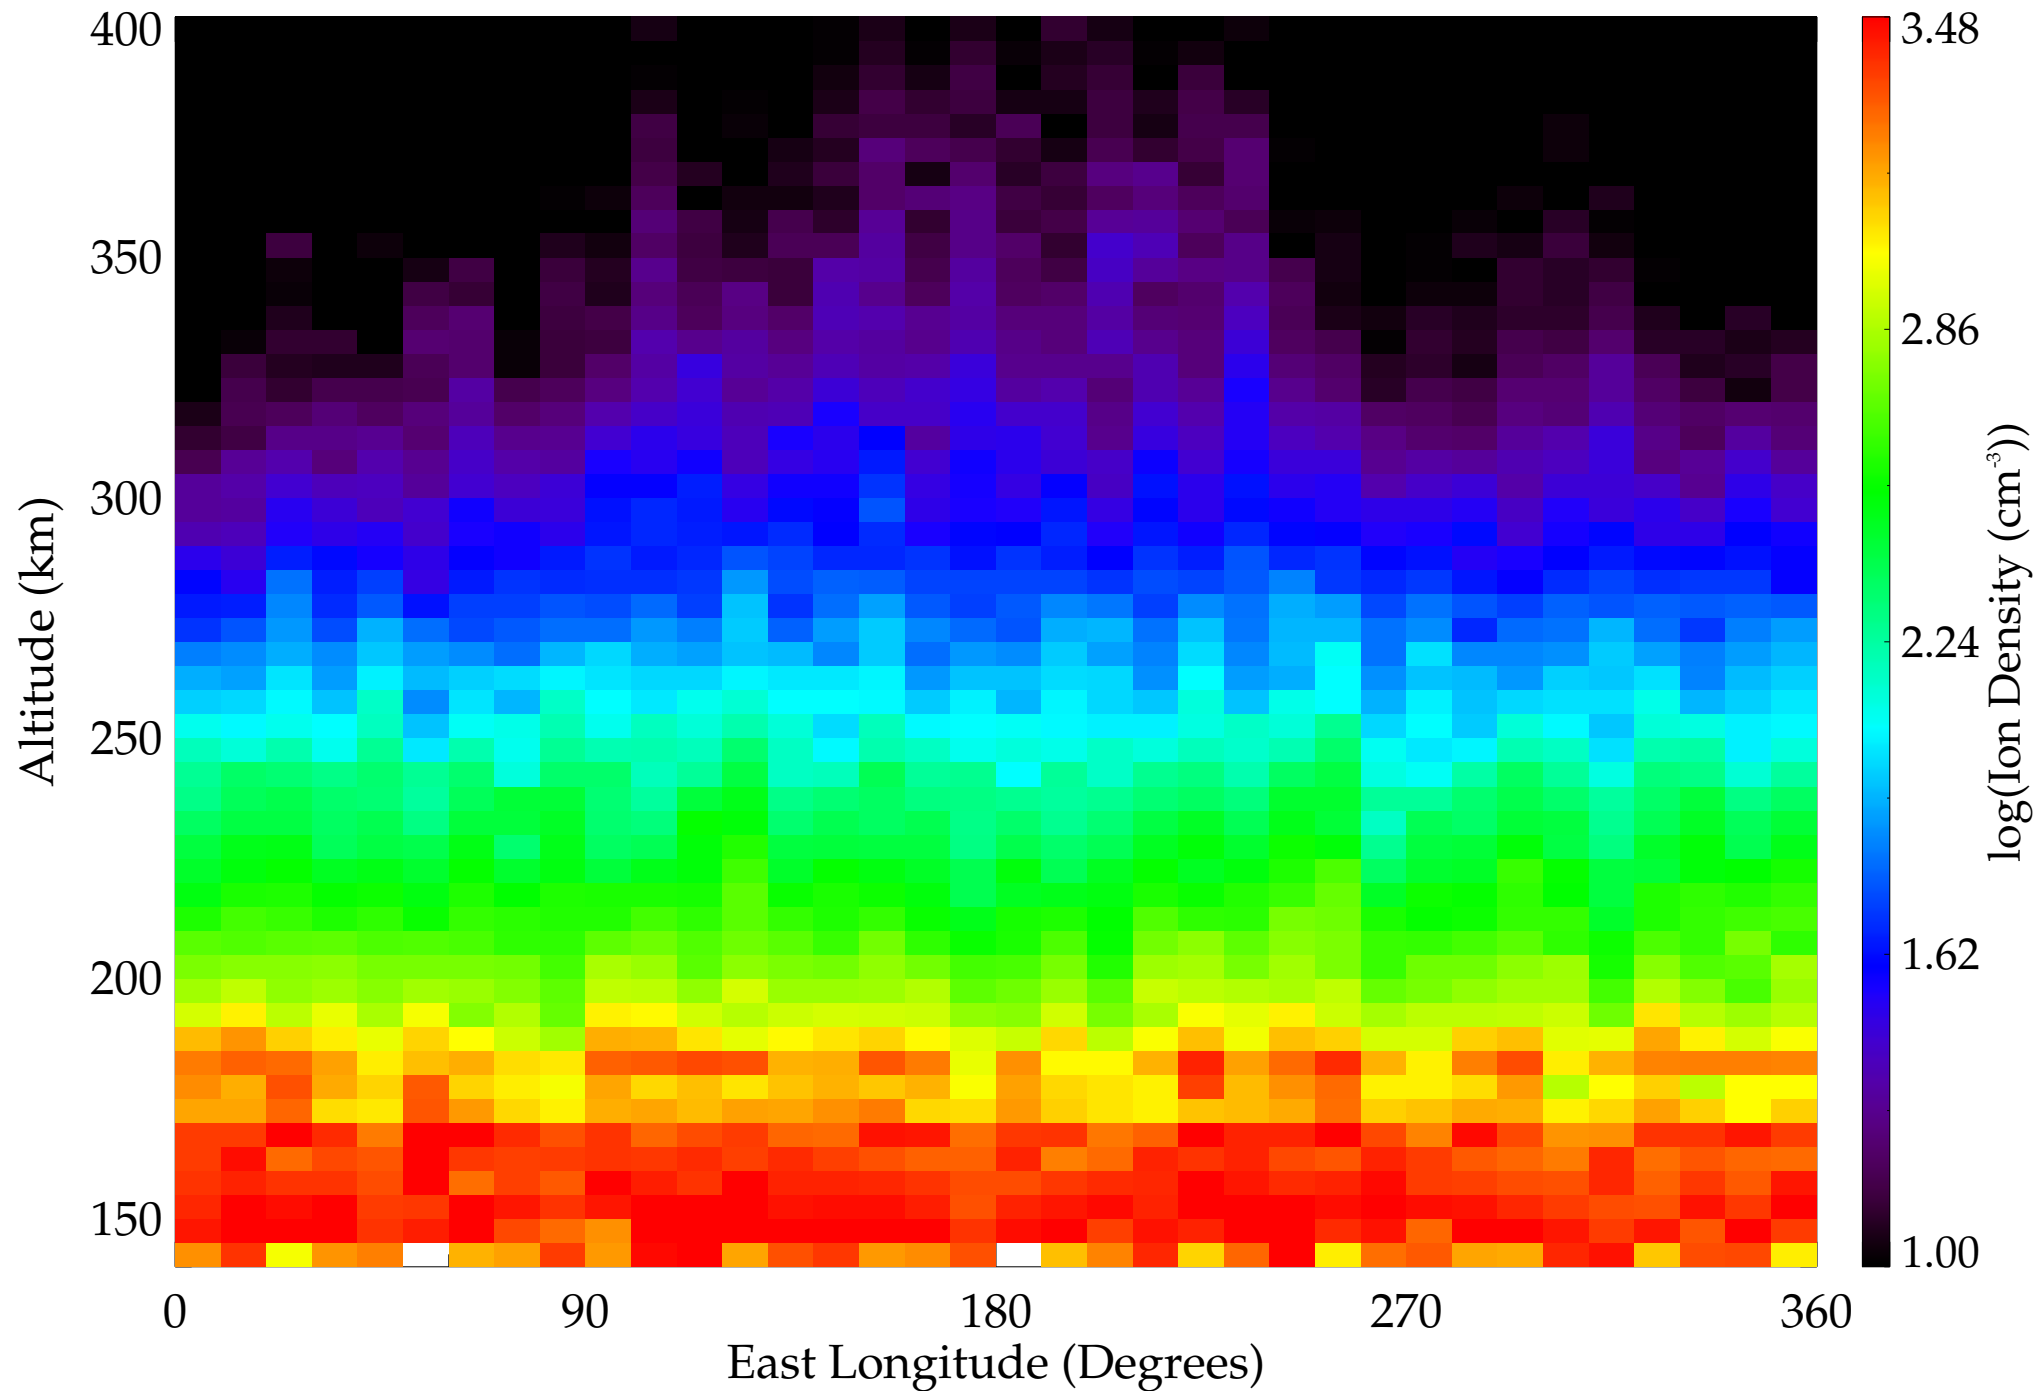

# Mass Number: 45

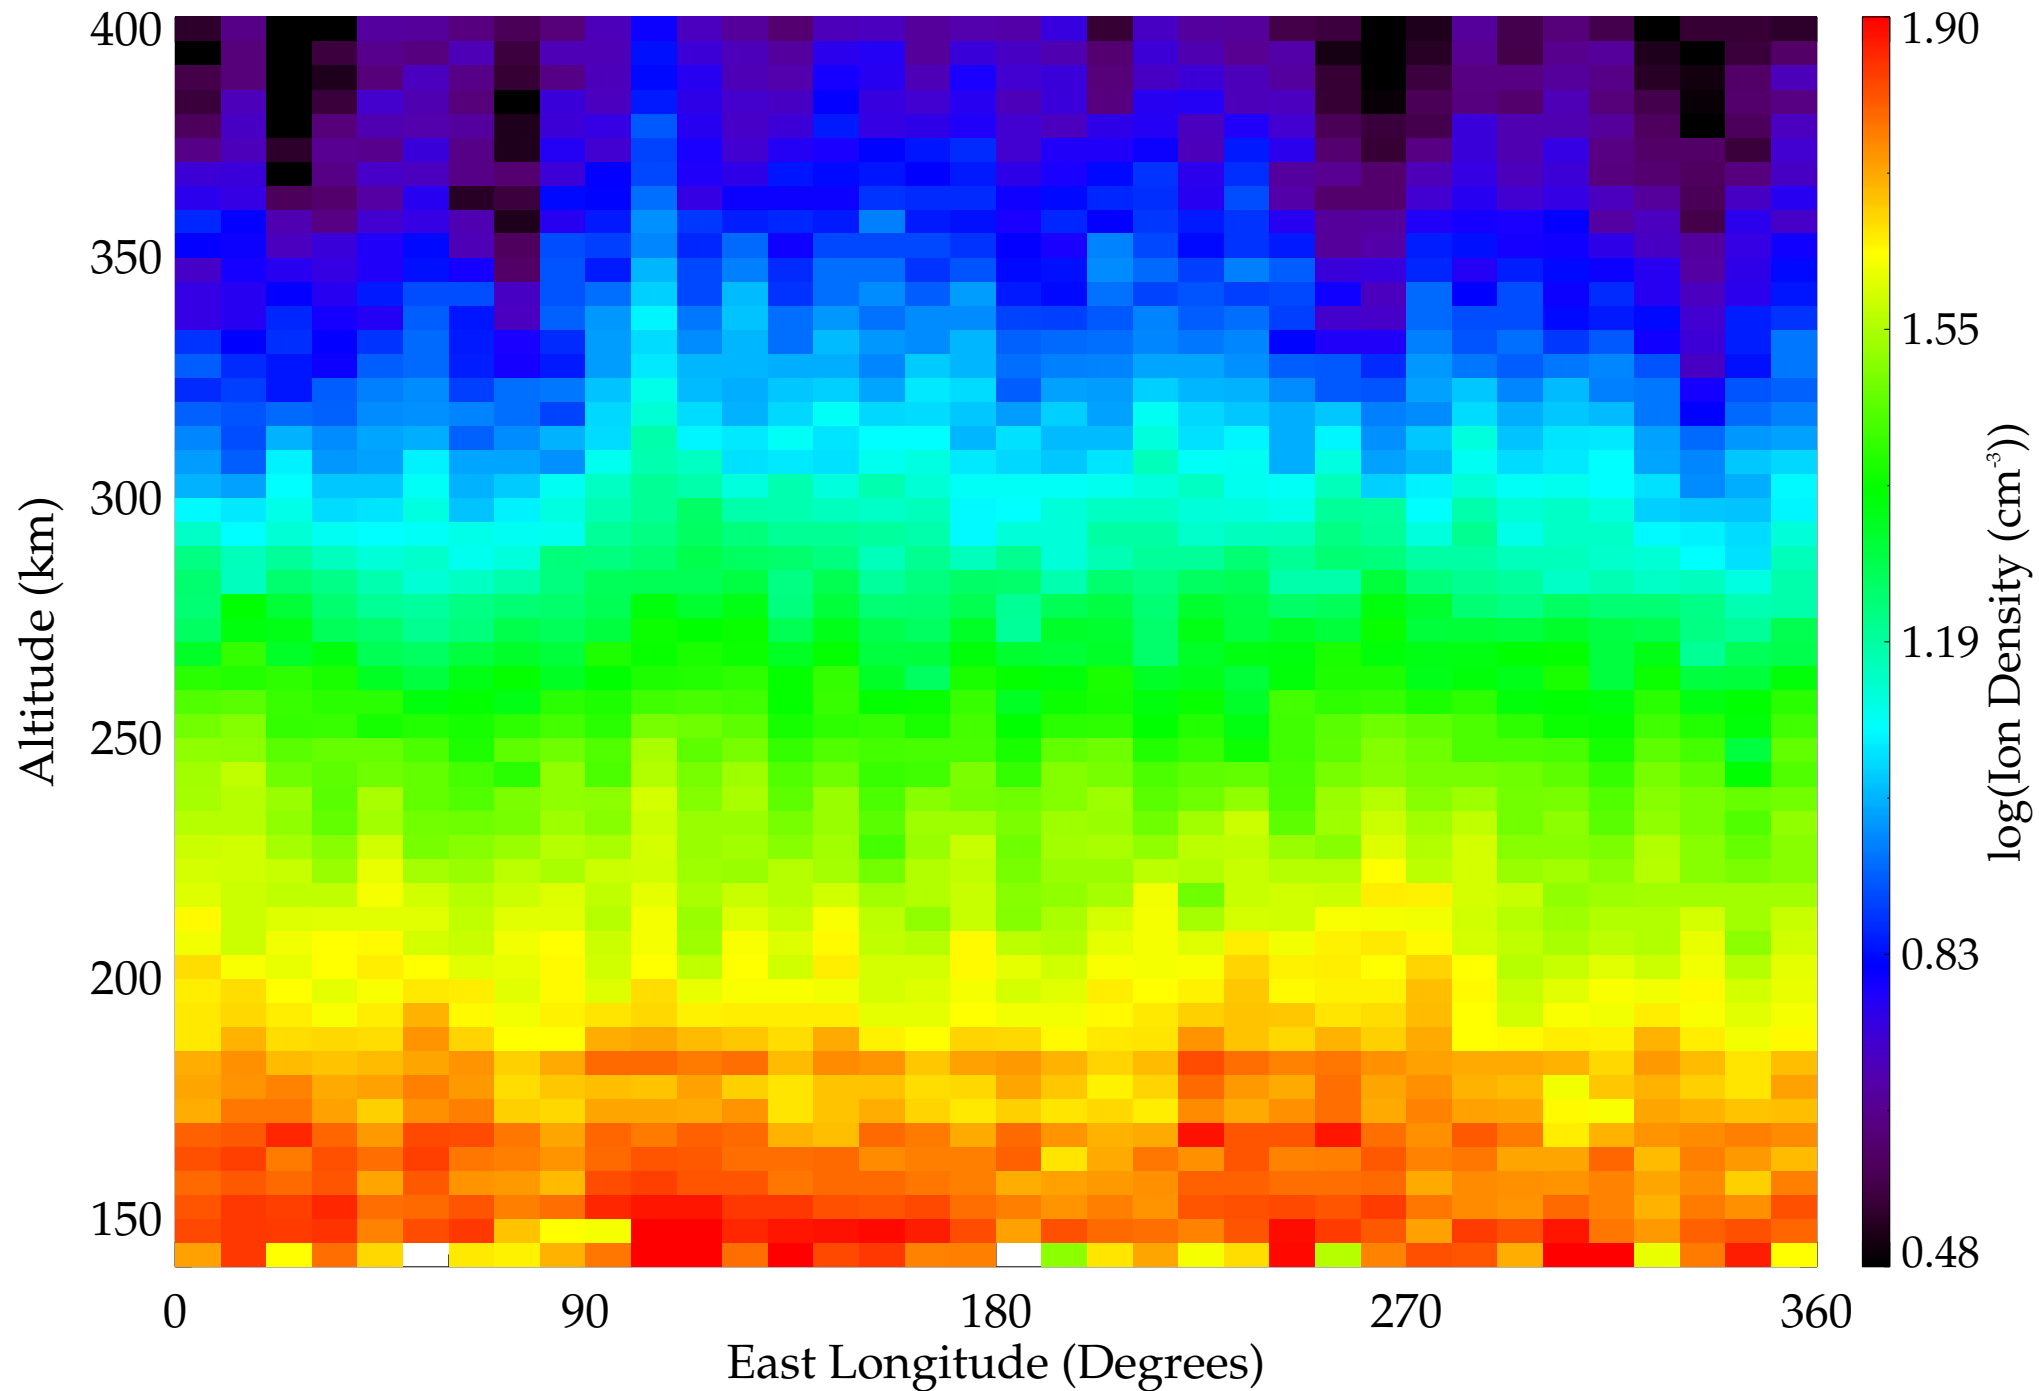

# Mass Number: 46

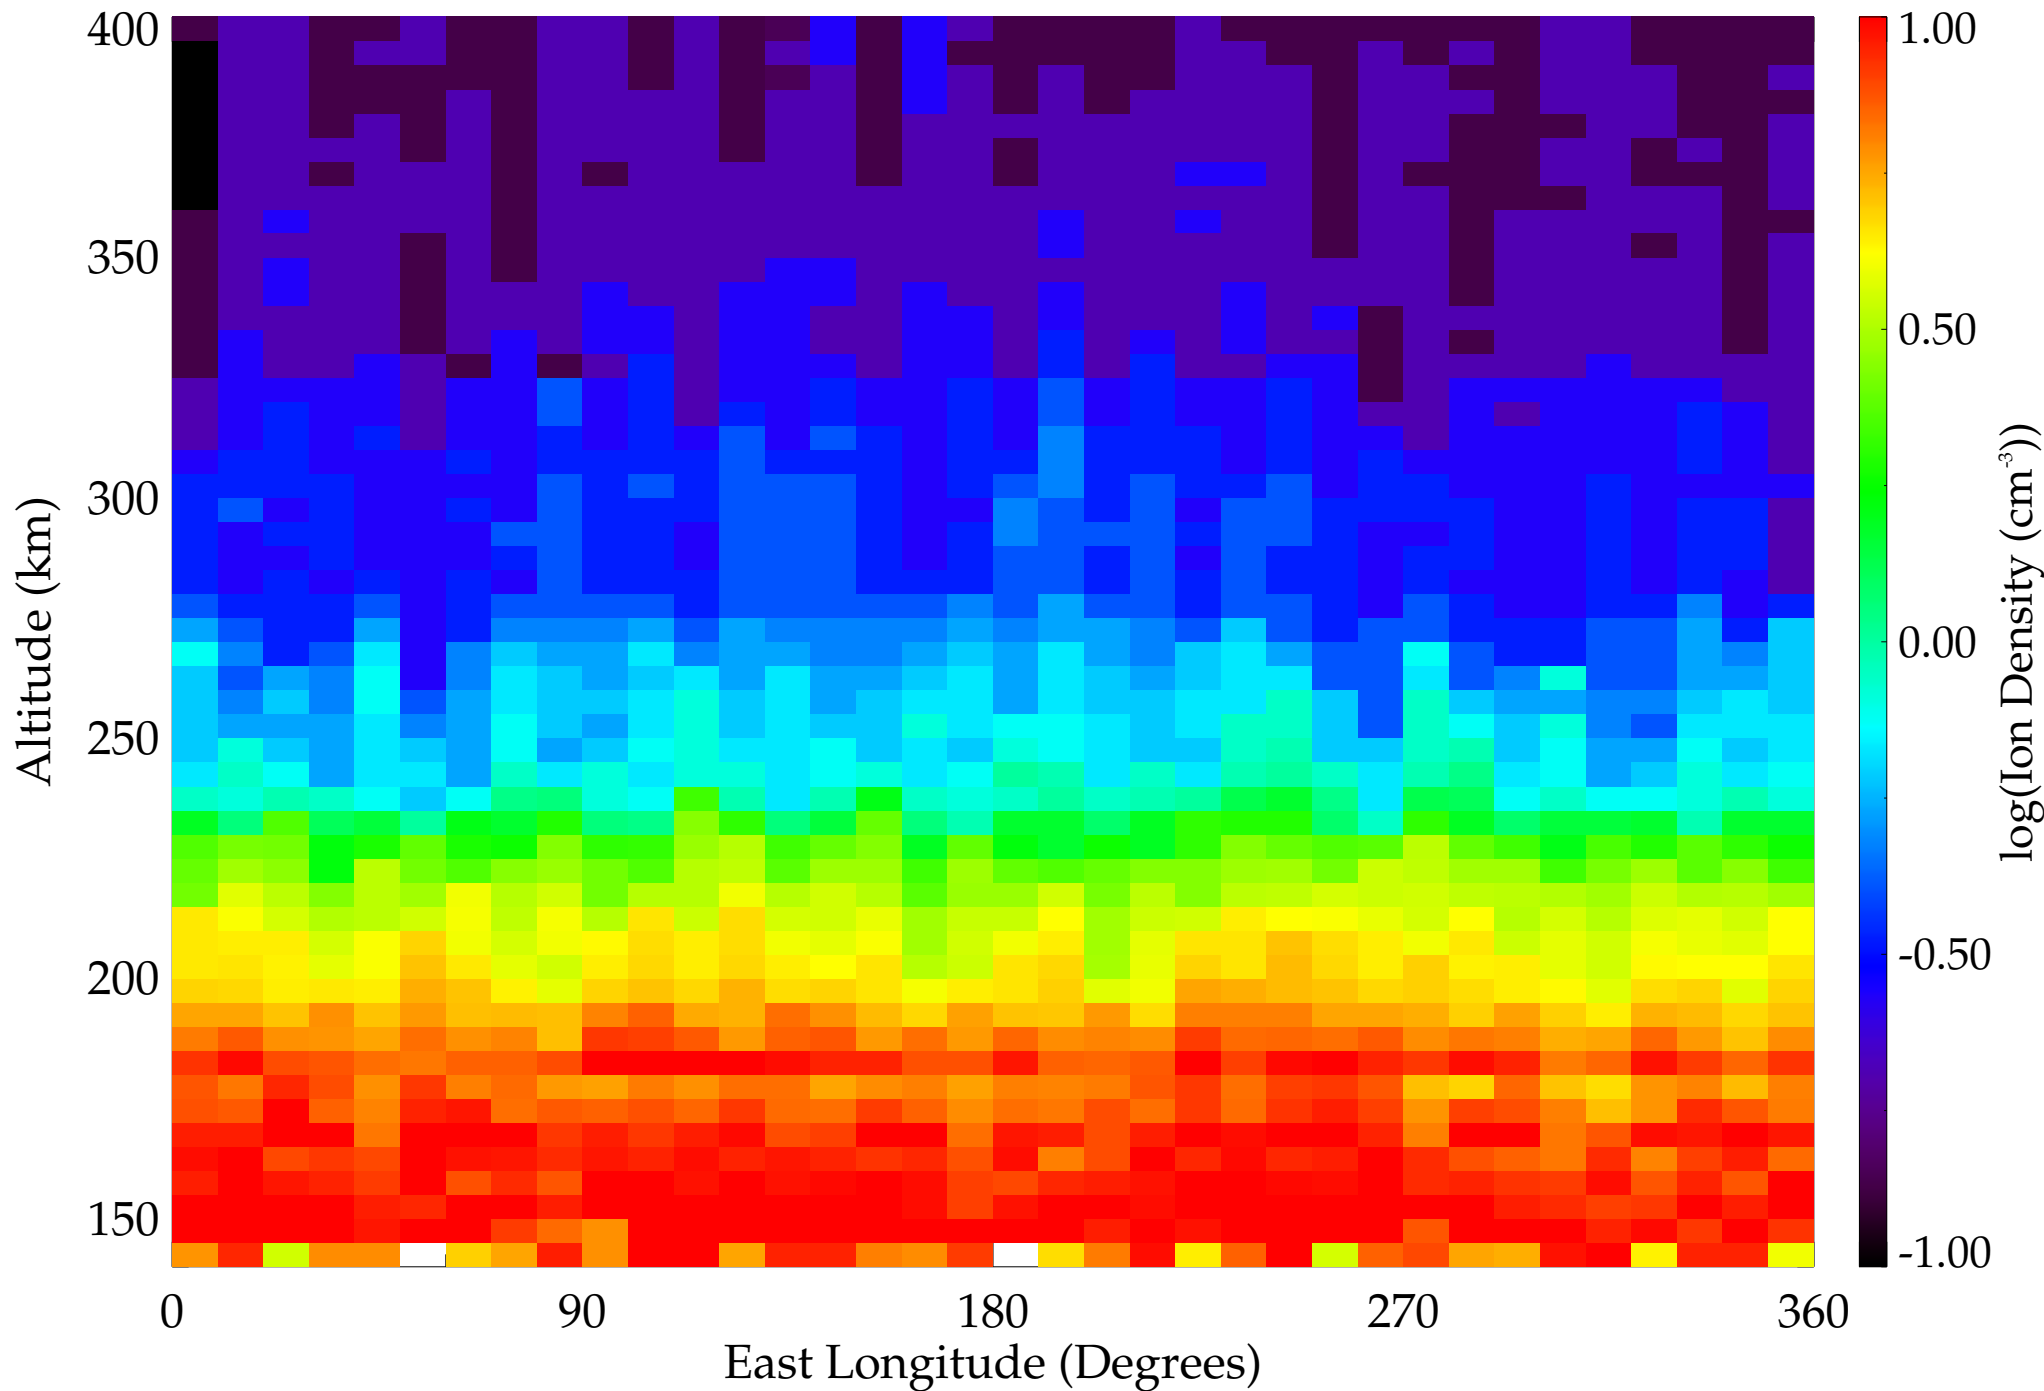



# Mass Number: 47

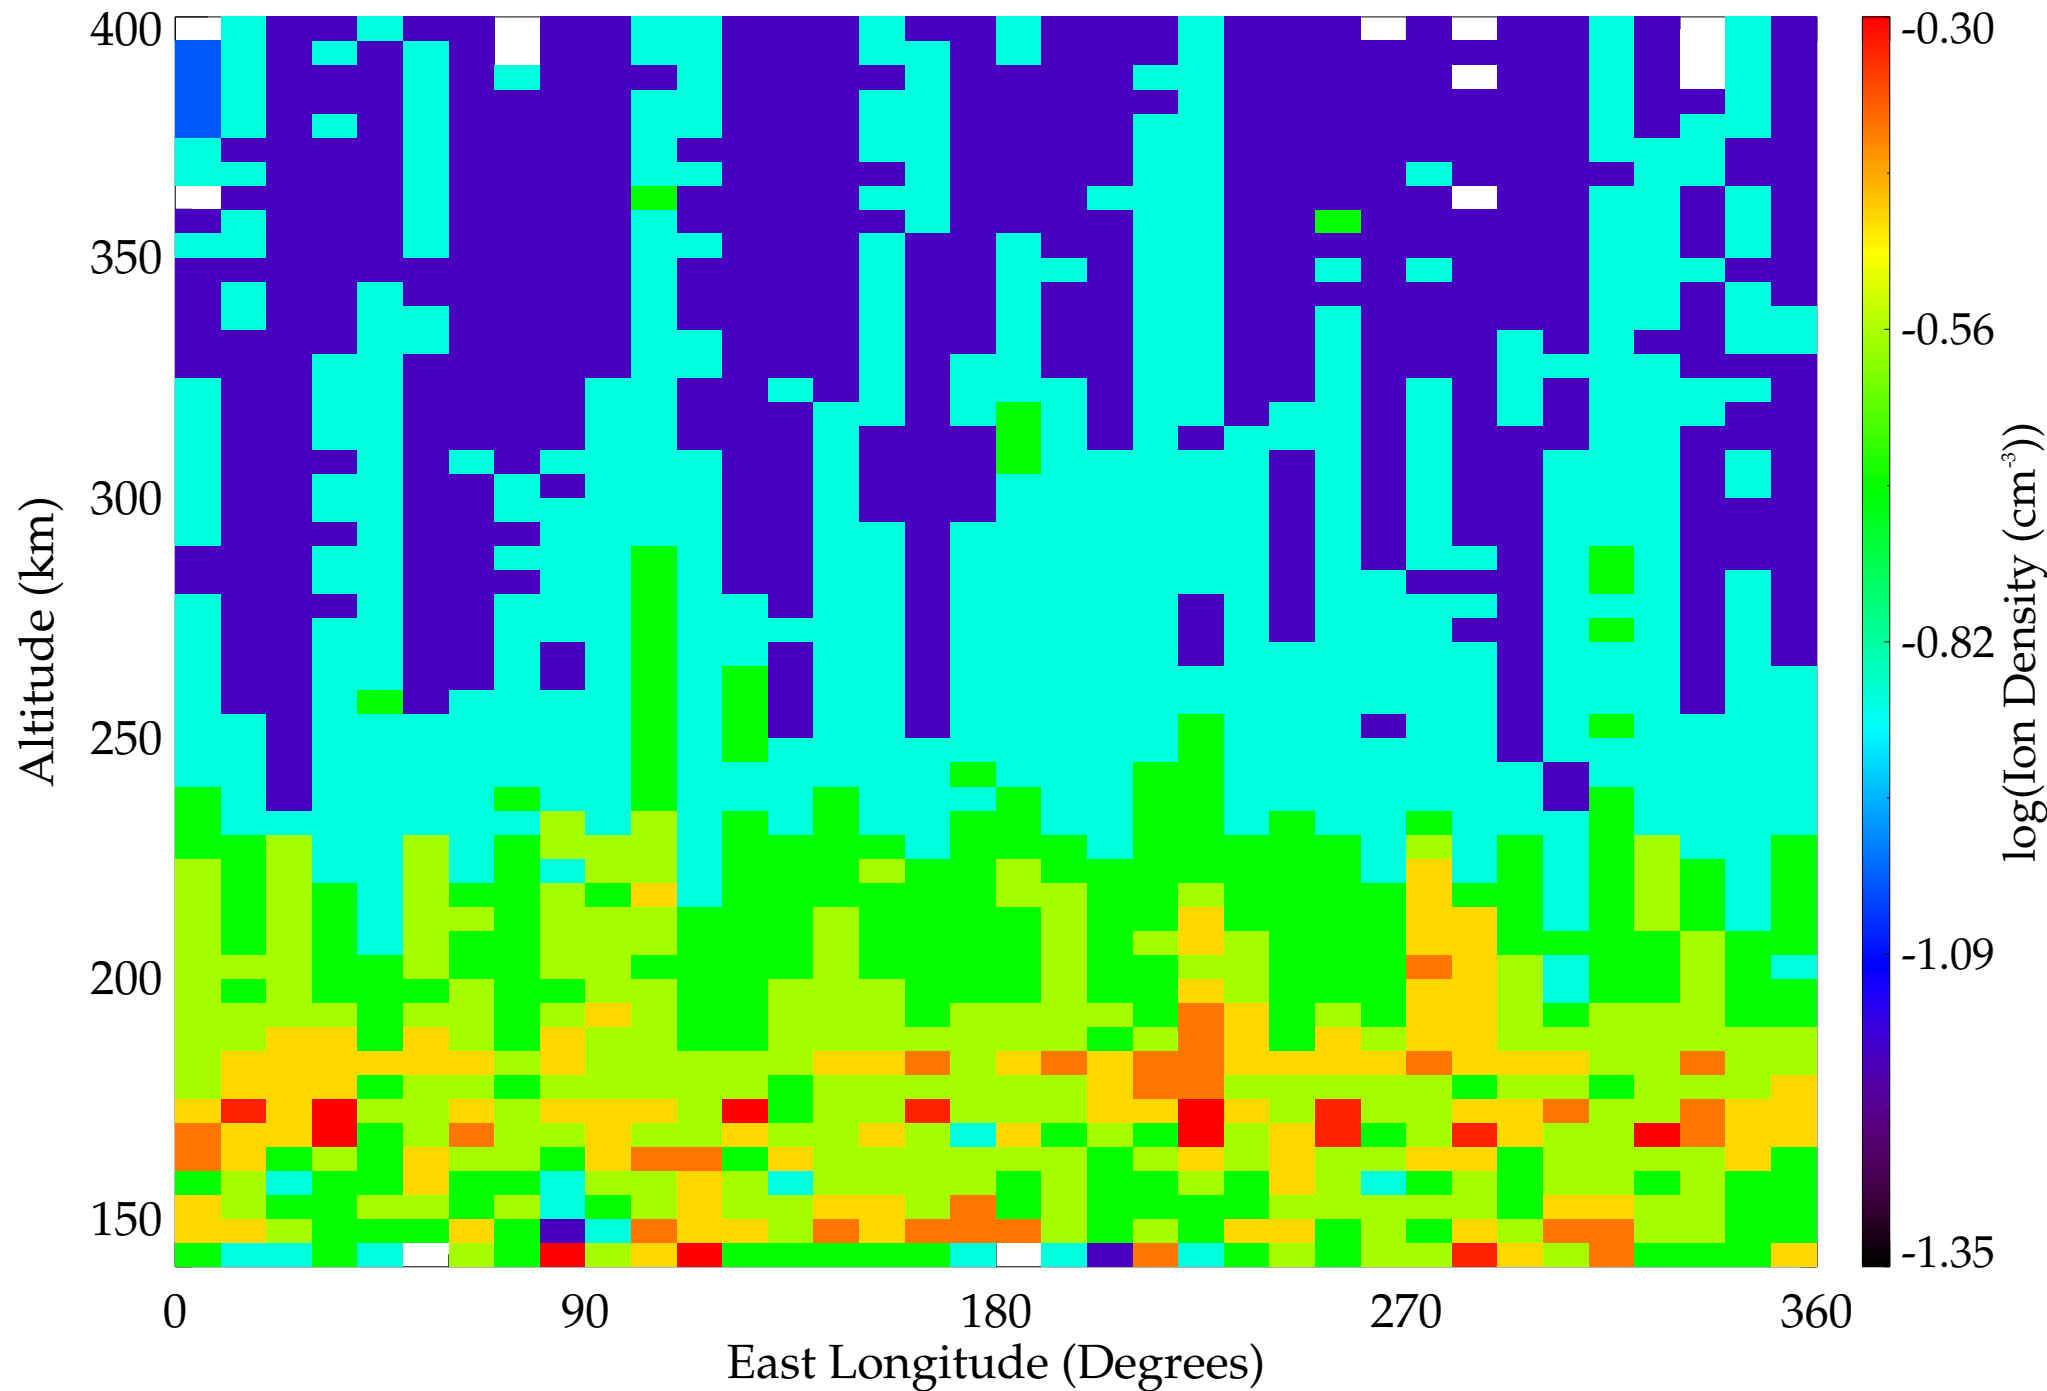

Supplement: NIHMS1617172-supplement-supporting_figures.pdf [file NIHMS1617172-supplement-supporting_figures.pdf]
